# 1 The AMIGO1 adhesion protein modulates 2 movement of Kv2.1 voltage sensors

3  
4 Condensed Title: AMIGO1 modulates Kv2.1 voltage sensors

5  
6 Rebecka J. Sepela<sup>1</sup>, Robert G. Stewart<sup>1</sup>, Luis A. Valencia<sup>3</sup>, Parashar Thapa<sup>1</sup>, Zeming Wang<sup>3</sup>, Bruce E.  
7 Cohen<sup>3,4</sup>, Jon T. Sack<sup>1,2\*</sup>

8  
9 <sup>1</sup>Department of Physiology and Membrane Biology, University of California, Davis, CA 95616

10 <sup>2</sup>Department of Anesthesiology and Pain Medicine, University of California, Davis, CA 95616

<sup>3</sup>Molecular Foundry, Lawrence Berkeley National Laboratory, Berkeley, CA 94720

<sup>4</sup>Division of Molecular Biophysics & Integrated Bioimaging, Lawrence Berkeley National  
Laboratory, Berkeley, CA 94720

11  
12 \*Correspondence to Jon T. Sack: [jsack@ucdavis.edu](mailto:jsack@ucdavis.edu)  
13 (ORCID <https://orcid.org/0000-0002-6975-982X>)  
14 1 Shields Ave. 4148 Tupper Hall. Davis, California 95616

## 15 Summary

16 This work investigates the functional mechanism by which the AMIGO1 adhesion protein  
17 modulates the conductance of the Kv2.1 channel subtype. We find that AMIGO1 acts by altering  
18 movement of the voltage sensors and destabilizing their earliest resting conformation.  
19

## 20 Abstract

21 Voltage-gated potassium (Kv) channels sense voltage and facilitate transmembrane flow  
22 of K<sup>+</sup> to control the electrical excitability of cells. The Kv2.1 channel subtype is abundant in  
23 most brain neurons and its conductance is critical for homeostatic regulation of neuronal  
24 excitability. Many forms of regulation modulate Kv2.1 conductance, yet the biophysical  
25 mechanisms through which the conductance is modulated are unknown. Here, we investigate the  
26 mechanism by which the neuronal adhesion protein AMIGO1 modulates Kv2.1 channels. With  
27 voltage clamp recordings and spectroscopy of heterologously expressed Kv2.1 and AMIGO1 in  
28 mammalian cell lines, we show that AMIGO1 modulates Kv2.1 voltage sensor movement to  
29 change Kv2.1 conductance. AMIGO1 speeds early voltage sensor movements and shifts the  
30 gating charge–voltage relationship to more negative voltages. Fluorescence measurements from  
31 voltage sensor toxins bound to Kv2.1 indicate that the voltage sensors enter their earliest resting  
32 conformation, yet this conformation is less stable upon voltage stimulation. We conclude that  
33 AMIGO1 modulates the Kv2.1 conductance activation pathway by destabilizing the earliest  
34 resting state of the voltage sensors.

## 35 Introduction

36 Voltage-gated potassium (Kv) channel proteins of the Kv2 family are critical regulators  
37 of neuronal electrical excitability. Kv2 channels are abundant (Vacher et al., 2008) homo- or  
38 heterotetramers of pore forming  $\alpha$  subunits (Bocksteins, 2016; Kihira et al., 2010; Trimmer,  
39 1993). The molecular architecture of Kv2.1 channels is similar to Kv1 channels for which atomic  
40 resolution structures have been solved (Long et al., 2005, 2007). Each  $\alpha$  subunit monomer has  
41 six transmembrane helical segments, S1-S6. S1-S4 comprise a voltage sensor domain (VSD)  
42 while S5 and S6 together form one quarter of the central pore domain. In response to sufficiently  
43 positive intracellular voltages, gating charges within the VSD translate from an intracellular  
44 resting position to a more extracellular activated conformation (Armstrong & Bezanilla, 1974;  
45 Tao et al., 2010; Xu et al., 2019). This gating charge movement powers the conformational  
46 changes of voltage sensor activation, which are coupled to subsequent pore opening and  
47 potassium conduction (Zagotta et al., 1994; Islas & Sigworth, 1999). The progression of the  $\alpha$   
48 channel protein through the entire landscape of conformations leading to opening, define a  
49 pathway for the activation of the  $K^+$  conductance.

50 Kv2 currents are present in most, if not all, central neurons. Genetic deletion of Kv2.1  
51 leads to seizure susceptibility and behavioral hyperexcitability in mice (Specia et al., 2014), and  
52 human Kv2.1 mutations result in developmental epileptic encephalopathy (Bar et al., 2020; Kang  
53 et al., 2019; Niday & Tzingounis, 2018; Thiffault et al., 2015; Torkamani et al., 2014),  
54 underscoring the importance of these channels to brain function. The unique kinetics and voltage  
55 dependence of Kv2 currents are critical to neuronal activity, as they regulate action potential  
56 duration and can either support or limit repetitive firing (Du et al., 2000; Hönigsperger et al.,  
57 2017; Kimm et al., 2015; Liu & Bean, 2014; Malin & Nerbonne, 2002; Mohapatra et al., 2009;  
58 Palacio et al., 2017; Romer et al., 2019). Kv2.1 conduction is regulated by multiple mechanisms  
59 that homeostatically maintain neuronal excitability (Cerdeira & Trimmer, 2011; Misonou et al.,  
60 2006; Romer et al., 2019; Specia et al., 2014). Kv2.1 regulation by ischemia (Aras et al., 2009;  
61 Misonou et al., 2004, 2005, 2008), glutamate (Baver & O'Connell, 2012; Mulholland et al.,  
62 2008), N-methyl-D-aspartic acid (Mulholland et al., 2008), phosphorylation and sumoylation  
63 (Ikematsu et al., 2011; Murakoshi et al., 1997; Park et al., 2006; Plant et al., 2011) and auxiliary  
64 protein subunits (Maverick et al., 2021; Peltola et al., 2011) all change the dynamics of Kv2.1  
65 channel activation to shift the midpoint of the conductance-voltage relation ( $G-V$ ) to more  
66 positive or negative voltages. However, it is not known which steps in the conductance activation  
67 pathway are modulated by any of these forms of regulation.

68 To identify activation steps that are targeted to modulate Kv2.1 conductance, we  
69 investigated modulation by the extracellular adhesion protein AMIGO1. AMIGO1  
70 (AMphoterin-Induced Gene and Open reading frame) is a single-pass transmembrane protein  
71 with an extracellular immunoglobulin domain and six leucine-rich repeats (Kuja-Panula et al.,  
72 2003) and is an auxiliary subunit of Kv2 channels (Peltola et al., 2011). AMIGO1 exhibits  
73 widespread subcellular colocalization with Kv2 in neurons throughout the brain and in multiple  
74 mammalian species (Bishop et al., 2018; Peltola et al., 2011, 2015). In vertebrate brain neurons,  
75 AMIGO1 is important for cell adhesion (Kajander et al., 2011; Kuja-Panula et al., 2003),  
76 neuronal tract development (Zhao et al., 2014), and circuit formation (Chen et al., 2012; Peltola  
77 et al., 2015; Zhao et al., 2014). AMIGO1 has been proposed to play a role in schizophrenia  
78 biology (Peltola et al., 2015). A robust association between AMIGO1 and Kv2.1 is evident by  
79 their coimmunoprecipitation from mouse and zebrafish brain samples (Peltola et al., 2011; Zhao  
80 et al., 2014) and their co-diffusion through neuronal membranes in response to stimuli that

81 reorganize Kv2.1 (Peltola et al., 2011). This robust association suggested that AMIGO1  
82 modulation of Kv2.1 would be sufficiently stable for biophysical study of its mechanism.

83 In other voltage-gated ion channels, the step(s) in the conductance activation pathway  
84 that are targeted by modulators have been identified. The  $G$ - $V$  relation can be shifted to more  
85 negative voltages by modulating pore opening (Dudem et al., 2020; Horrigan & Aldrich, 2002;  
86 Rockman et al., 2020), voltage sensor movement (Barro-Soria et al., 2015), or voltage sensor-  
87 pore coupling (Barro-Soria et al., 2017; Nakajo & Kubo, 2015; Yan & Aldrich, 2010). Single-  
88 pass transmembrane auxiliary subunits modulate other voltage-gated ion channel  $\alpha$  subunits by a  
89 variety of mechanisms (Barro-Soria et al., 2014, 2017; Brackenburg & Isom, 2011; Dudem et al.,  
90 2020; Zhang & Yan, 2014). However, AMIGO1 only shares a limited degree of secondary  
91 sequence with other single-pass transmembrane auxiliary subunits (Chen et al., 2006), and  
92 divergent structural interactions have been observed among other single-pass transmembrane  
93 auxiliary subunits (Shen et al., 2019; Sun & MacKinnon, 2020). As there is no consensus  
94 binding pose or mechanism of interaction for auxiliary subunits, it is difficult to predict which  
95 step in the conductance activation pathway AMIGO1 acts on. A recent study proposed that  
96 AMIGO proteins shift Kv2.1 conductance by increasing voltage sensor-pore coupling, and that  
97 measurements of voltage sensor movement could test this hypothesis (Maverick et al., 2021).

98 Here we ask whether AMIGO1 alters conformational changes associated with pore  
99 opening or with voltage sensor movement. To interrogate the mechanism through which  
100 AMIGO1 modulates the Kv2.1 conductance activation pathway, we use a combination of  
101 electrophysiological and imaging approaches. We find that AMIGO1 affects conductance  
102 activation to a different degree when Kv2.1 gating is modified. We find no changes in single  
103 channel conductance. We find that AMIGO1 modulates voltage sensor movements, yet find no  
104 evidence that the large extracellular domain of AMIGO1 perturbs the electrostatic environment  
105 of the voltage sensor. We conclude that AMIGO1 destabilizes the earliest resting conformation  
106 in the pathway of channel activation.

111

## 112 Methods

113

### 114 Reagents

115 A conjugate of a cysteine–modified guangxitoxin–1E and the maleimide of fluorophore  
116 Alexa594 (GxTX Ser13Cys(Alexa594)) was used to selectively modulate Kv2.1 channel gating  
117 and to fluorescently identify surface-expressing Kv2.1 channels (Thapa et al., 2021). Conjugates  
118 of propargylglycine (Pra)–modified GxTX and the fluorophore JP–N<sub>3</sub> (GxTX Ser13Pra(JP) and  
119 GxTX Lys27Pra(JP)) were used to monitor the chemical environment surrounding GxTX when  
120 localized to the channel (Fletcher-Taylor et al., 2020). All modified GxTX–mutants were  
121 synthesized by solid phase peptide synthesis as described (Fletcher-Taylor et al., 2020; Tilley et  
122 al., 2014).

123

### 124 Cell culture

#### 125 Maintenance

126 The HEK293 cell line subclone TS201A (Eaholtz et al., 1994) was obtained from Cell  
127 Genesis and maintained in DMEM (Gibco Cat# 11995-065) with 10% Fetal Bovine Serum  
128 (HyClone Cat# SH30071.03HI, LotAXM55317) and 1% penicillin/streptomycin (Gibco, 15-140-  
129 122) in a humidified incubator at 37°C under 5% CO<sub>2</sub>. Channel expression was achieved by  
130 transient transfection.

131 The two different Tetracycline-Regulated Expression (T-REx<sup>TM</sup>) Chinese Hamster Ovary  
132 (CHO) cell lines, both stably expressing the Tet repressor (pcDNA<sup>TM</sup>6/TR plasmid) were  
133 cultured as described previously (Tilley et al., 2014). One “CHO cell” subclone (Invitrogen,  
134 Cat# R71807) only expressed pcDNA<sup>TM</sup>6/TR and was used in experiments with pCAG-  
135 ChromE-mRuby2-ST transfection. The other “Kv2.1–CHO cell” subclone (Trapani & Korn,  
136 2003) expressed pcDNA<sup>TM</sup>6/TR and pCDNA<sup>TM</sup>4/TO encoding the rat Kv2.1 (rKv2.1) channel.  
137 Within these Kv2.1-CHO cells, a dose of 1 μg/ml minocycline (Enzo Life Sciences), prepared in  
138 70% ethanol, was added to the cellular media for indicated durations to induce rKv2.1 channel  
139 expression. (While minocycline is needed for appreciable Kv2.1 expression, there may be some  
140 residual Kv2.1 expression due to leakiness within the tet–repressor system (Trapani & Korn,  
141 2003).) The Kv2.1-CHO cell line was negative for mycoplasma contamination by biochemical  
142 tests (LT07; MycoAlert; Lonza).

143 CHO cells were chosen as an expression system due to their lack of substantial  
144 endogenous K<sup>+</sup> currents (Gamper et al., 2005). The incorporation of the inducible expression  
145 system promotes less cell-to-cell variation in current density than transient transfection  
146 (Supplemental Fig. 2A, B vs. D, E, F, G), helps minimize issues associated with Kv2.1 current  
147 density being too high or too low, and can be tuned to achieve appropriate expression for  
148 different experiments. We choose to limit induction to 1.5 hours to minimize series resistance-  
149 induced voltage errors apparent in ionic K<sup>+</sup> current recordings (Fig. 4, 6, 10) and increased  
150 induction to 48 hours to produce sufficient Kv2.1 density necessary for recording gating currents  
151 (Fig. 7).

152

#### 153 Transfection

154 5 minutes prior to transfection, cells were plated at 40% confluency in culture media free  
155 of antibiotics, selection agents, and serum and allowed to settle at room temperature. For  
156 imaging studies (except dose–response), cells were plated in 35 mm No. 1.5 glass–bottom dishes

157 (MatTek, P35G-1.5-20-C). For dose response time-lapse imaging, cells were plated onto 22 x 22  
158 mm No. 1.5H coverglass (Deckglaser). For electrophysiological studies, cells were plated in 35  
159 mm tissue culture treated polystyrene dishes (Fisher Scientific, 12-556-000). Transfections were  
160 achieved with Lipofectamine 2000 (Life Technologies, 11668-027). Each transfection included  
161 220  $\mu$ L Opti-MEM (Life Technologies, 31985062), 1.1  $\mu$ L Lipofectamine, and the following  
162 amount of plasmid DNA. HEK293 cell experiments: 0.1  $\mu$ g of mKv2.1 DNA and either 0.1  $\mu$ g  
163 of pEGFP, mAMIGO1-pIRES2-GFP DNA, or hSCN1 $\beta$ -pIRES2-GFP. The pIRES2-GFP  
164 vector has an encoded internal ribosome entry site which promotes continuous translation of two  
165 genes from a singular mRNA (Liu et al., 2000) so that GFP fluorescence indicates the presence  
166 of AMIGO1 or SCN1 $\beta$  mRNA. Kv2.1-CHO cell experiments: 1  $\mu$ g of either mAMIGO1-  
167 pEYFP-N1 or pEGFP. CHO cells experiments: 1  $\mu$ g of both pCAG-Chrome-mRuby2-ST and  
168 mAMIGO1-pEYFP-N1. Cells were incubated in the transfection cocktail and 2 mL of  
169 unsupplemented, basal media for 6-8 hours before being returned to regular growth media. Cells  
170 were given 40-48 hours recovery following transfection before being used for experiments.  
171 pEGFP, mAMIGO1-pEYFP-N1, and pCAG-Chrome-mRuby2-ST (Mardinly et al.,  
172 2018) plasmids were all kind gifts from James Trimmer, University of California, Davis.  
173 mAMIGO1-pEYFP-N1 uses a VPRARDPPVAT linker to tag the internal C-terminus of wild-  
174 type mouse AMIGO1 (NM\_001004293.2 or NM\_146137.3) with eYFP. pCAG-Chrome-  
175 mRuby2-ST is a vector encoding a soma-targeted and mRuby2-tagged opsin protein engineered  
176 by (Mardinly et al., 2018) using the Kv2.1-derived soma-targeting and ER-PM junction-  
177 remodeling amino acid sequence (Kirmiz et al., 2018a; Lim et al., 2000). mKv2.1 (NM\_008420)  
178 was purchased from OriGene (MG210968). hSCN1 $\beta$ -pIRES2-GFP was a kind gift of Dr.  
179 Vladimir Yarov-Yarovoy (University of California, Davis). mAMIGO1-pIRES2-GFP was  
180 subcloned from hSCN1 $\beta$ -pIRES2-GFP by Mutagenex. NheI and BamHI restriction sites were  
181 used to subclone mAMIGO1 into the place of hSCN1 $\beta$ .

182

### 183 Electrophysiology

184 Voltage clamp was achieved with an Axopatch 200B patch clamp amplifier (Axon  
185 Instruments) run by Patchmaster software (HEKA).

186

### 187 Whole-cell macroscopic ionic current measurements

188 Recording solutions were prepared as follows:

| Cell type                                                                             | External Solution (in mM)                                                                                                                      | Internal Solution (in mM)                                                                                                                          |
|---------------------------------------------------------------------------------------|------------------------------------------------------------------------------------------------------------------------------------------------|----------------------------------------------------------------------------------------------------------------------------------------------------|
| HEK293 cells<br>LJP: 3.9 mV<br>E <sub>K</sub> : -89.0 mV                              | 5 KCl, 160 NaCl, 10 HEPES, 2<br>CaCl <sub>2</sub> , 2 MgCl <sub>2</sub> , 10 glucose<br>adjusted to pH 7.32 with NaOH.<br>Osmolality: 345 mOsm | 160 KCl, 5 EGTA, 10 HEPES, 1<br>CaCl <sub>2</sub> , 2 MgCl <sub>2</sub> , and 10 glucose,<br>adjusted to pH 7.31 with KOH.<br>Osmolality: 344 mOsm |
| Kv2.1-CHO cells<br>LJP: 8.5 mV<br>E <sub>K</sub> : -97.4 mV                           | 3.5 KCl, 155 NaCl, 10 HEPES, 1.5<br>CaCl <sub>2</sub> , 1 MgCl <sub>2</sub> , adjusted to pH<br>7.4 with NaOH.<br>Osmolality: 315 mOsm         | 70 KCl, 5 EGTA, 50 HEPES, 50<br>KF, and 35 KOH, adjusted to pH<br>7.4 with KOH.<br>Osmolality: 310 mOsm*                                           |
| Kv2.1-CHO cells<br>With Mg <sup>2+</sup><br>LJP: 13.1 mV<br>E <sub>K</sub> : -97.4 mV | 3.5 KCl, 6.5 NaCl, 10 HEPES, 1.5<br>CaCl <sub>2</sub> , 100 MgCl <sub>2</sub> , adjusted to pH<br>7.41 with NaOH.<br>Osmolality: 289 mOsm      | 70 KCl, 5 EGTA, 50 HEPES, 50<br>KF, and 35 KOH, adjusted to pH<br>7.4 with KOH.<br>Osmolality: 298 mOsm*                                           |

Osmolality was measured by a VAPRO vapor pressure osmometer 5520. For each experiment/cell type, internal and external solutions were measured side-by-side on the same day. LJP values were tabulated using Igor's patchers power tools extension version 2.15 (Dr. Francisco Mendez and Frank Wurrichhausen, Max-Planck-Institut für biophysikalische chemie). LJP values were corrected for *post hoc*, offline. \*The external solutions for Kv2.1CHO cells and for Kv2.1CHO cells with Mg<sup>2+</sup> were prepared in two separate batches; osmolality measurements less than 10% of the theoretical (expected) value were tolerated for use.

189  
190 Kv2.1 channel expression was achieved through transient transfection in HEK293 cells  
191 (see “*transfection*”) and through 1-1.5 hours of incubation with minocycline administered in  
192 culture immediately prior to patching for Kv2.1-CHO cells. Prior to patch-clamp current  
193 recordings, Kv2.1-CHO cells were harvested by scraping in Versene (Gibco, 15040066) or  
194 TrypLE (Gibco, 12563011). HEK293 cells were dislodged by scraping. Dissociated cells were  
195 transferred to a polypropylene tube, washed three times by pelleting at 1,000 x g for 2 minutes  
196 and then resuspend in in the same external solution as used in the recording chamber bath. Cells  
197 were rotated in a polypropylene tube at room temperature (22-24 °C) until use. Cells were then  
198 pipetted into a 50 μL recording chamber (Warner Instruments, RC-24N) prefilled with external  
199 solution and allowed to settle for 5 or more minutes. For HEK293 experiments, the external  
200 solution was supplemented with TTX at 5 μM to block endogenous sodium channels which are  
201 sporadically expressed in HEK293 cells. After adhering to the bottom of the glass recording  
202 chamber, cells were thoroughly rinsed with external solution using a gravity-driven perfusion  
203 system. Cells showing plasma membrane-associated YFP expression or intracellular GFP  
204 expression of intermediate intensity were selected for patching.

205 Borosilicate glass recording pipettes (BF150-110-7.5HP, Sutter) were pulled with blunt  
206 tips, coated with silicone elastomer (Sylgard 184, Dow Corning), heat cured, and tip fire-  
207 polished to resistances less than 4 MΩ. Series resistances of 3–9 MΩ (before compensation)  
208 were estimated from the value arrived at during whole-cell capacitive transient subtraction by  
209 manual adjustment of the whole-cell parameters circuit of the amplifier. Series-resistance  
210 compensation lag was set to 10 μs. Series resistance compensation (of < 90%) was used as  
211 needed to constrain voltage error to less than 10 mV. Cell capacitances were 4–15 pF, resulting  
212 in cell membrane charging time constants of <50 μs before compensation. The series resistance  
213 compensation prediction (super-charging) circuit was not used. Remaining capacitance and  
214 Ohmic leak were subtracted using a P/5 protocol. Recordings were low-pass filtered at 10 kHz  
215 using the amplifier's built-in Bessel and digitized at 100 kHz.

216  
217 Whole-cell macroscopic ionic current voltage protocols HEK293 cells

218 Conductance-voltage (*G-V*) profiles for HEK293 cells were derived from cells held at -  
219 80 mV and depolarized by steps ranging from -80 mV to +85 mV in increments of +5 mV (100  
220 ms) before being returned to 0 mV (100 ms) to record tail currents. The intersweep interval was  
221 2 s. The average current in the 100 ms prior to the voltage step was used to zero-subtract the  
222 recording. Mean outward current was quantitated as the mean amplitude between 90-100 ms post  
223 depolarization. Cells with less than 65 pA/pF of outward current at +85 mV were excluded  
224 because they lacked a 3-fold increase in the amount of cell size-normalized outward current  
225 compared to what could be expected from endogenous K<sup>+</sup> channels in HEK293 cells (Yu &  
226 Kerchner, 1998). Mean tail current was derived from the average amplitude between 0.2-1.2 ms  
227 into the 0 mV step.

228

229 Whole-cell macroscopic ionic current voltage protocols in Kv2.1-CHO cells

230  $G$ - $V$  profiles for Kv2.1-CHO cells were derived from cells held at -100 mV and  
231 depolarized by steps ranging from -80 mV to +120 mV in increments of +5 mV (100 ms) before  
232 being returned to 0 mV (100 ms). The intersweep interval was 2 s. The average current in the  
233 100 ms prior to voltage step was used to zero-subtract the recording. Mean outward current was  
234 taken as the mean value between 190-200 ms. Mean tail current values were derived from the  
235 average current value between 200.2-201.2 ms.

236

237 Whole-cell macroscopic ionic current voltage protocols in Kv2.1-CHO cells with GxTX-594

238 Cells that maintained a membrane resistance greater than 1 G $\Omega$  (when held near the  
239 holding potential) after a first round of ionic current voltage protocols, were selected to be  
240 treated with GxTX-594. 5 minutes after the addition of 100  $\mu$ L of 100 nM GxTX-594, the  
241 voltage-step protocol was run once more. GxTX-594 was diluted from a 13.1  $\mu$ M stock (stored  
242 at -80  $^{\circ}$ C, thawed on ice) to its working concentration in the 3.5 mM K $^{+}$  patching solution.  
243 GxTX-594 was added manually while holding at -100 mV; during initial additions, the  
244 membrane potential was pulsed to 0 mV to gauge the time course of binding. To promote fluid  
245 exchange during the addition and to maintain constant bath fluid level, fluid from the chamber  
246 was removed distally through vacuum tubing.

247

248 Whole-cell macroscopic ionic current  $G$ - $V$  analysis

249 Both HEK293 and Kv2.1-CHO voltage clamp data was adjusted for series-resistance  
250 induced voltage error and normalized in Microsoft Excel. Any datum from voltage steps that  
251 produced a series-resistance induced voltage error greater than 10 mV was excluded from  
252 analysis. Voltage error ( $V_{error}$ ) was tabulated by the product of current amplitude taken from the  
253 zero-subtracted, mean outward current ( $I_{avg,step}$ ), and estimated series resistance remaining after  
254 compensation ( $R_{s,uncompensated}$ ) (Eqn. A).

$$V_{error} = I_{avg,step} * R_{s,uncompensated} \quad (\text{Eqn. A})$$

255 Tail currents were normalized by the mean tail current elicited from 50-80 mV plotted against  
256 the estimated membrane potential ( $V_{membrane}$ ), which accounted for both voltage-error and the  
257 calculated liquid junction potential ( $LJP$ ) (Eqn. B),

$$V_{membrane} = V_{command} - V_{error} - LJP \quad (\text{Eqn. B})$$

258

259  $G$ - $V$  relations were individually fit with a 4 $^{th}$  power Boltzmann (Eqn. C) in order to represent the  
260 four independent and identical voltage sensors that must all activate for channels to open. Fitting  
261 was carried out using Igor Pro software, version 7 or 8 (Wavemetrics, Lake Oswego, OR) that  
262 employs nonlinear least squares curve fitting via the Levenberg-Marquardt algorithm.

$$\left( 1 + e^{\frac{-(V-V_{i,1/2})z_i F}{RT}} \right)^x \quad (\text{Eqn. C})$$

263

264 Within a 4 $^{th}$  power Boltzmann  $G$  is conductance,  $A$  is maximum amplitude,  $V_{i,1/2}$  is the activation  
265 midpoint for each of four independent transitions in units of millivolts,  $z_i$  is the minimum  
266 effective gating valence associated with channel activation in units of elementary charge  $e_0$  as  
267 determined by ionic currents,  $F$  is the Faraday constant,  $R$  is the ideal gas constant,  $T$  is absolute  
268 temperature, and  $x$  represents the number of independent identical transitions required to open a

269 channel. To calculate the  $V_{i, \text{Mid}}$  values corresponding to 4<sup>th</sup> power Boltzmann fits, the  $V_{i, 1/2}$  and  $z_i$   
270 fit values were input into (Eqn. D).

$$V_{i, \text{Mid}} = V_{i, 1/2} + \frac{42.38}{z_i} \quad (\text{Eqn. D})$$

271 For clarity of presentation, “average”  $G_K$  plots represent reconstructed Boltzmann curves that  
272 were formulated using the average  $V_{i, 1/2}$  and average  $z_i$  values obtained from the grouped  
273 individual fits. The shaded regions surrounding the reconstructed curve represent Boltzmann  
274 curves reconstructed using the average  $z_i$  and either  $V_{i, 1/2} + \text{SD}$  or  $V_{i, 1/2} - \text{SD}$ .

275

276 Whole-cell macroscopic ionic current free energy and  $K_{\text{eq}}$  calculations

277 To estimate of the Gibbs free energy ( $\Delta G_{\text{AMIGO1}}$ ) that AMIGO1 must impart onto Kv2.1  
278 in order to produce the observed shift in the  $G-V$ , we used (Eqn. E).

$$\Delta G = -R \times T \times \ln(K_{\text{eq}}) \quad (\text{Eqn. E})$$

279 Here  $R = 0.00199 \text{ kcal}/(\text{K} \cdot \text{mol})$  and  $T = 298\text{K}$ .  $K_{\text{eq}}$ , or the equilibrium constant of channel

280 opening, was approximated by  $\frac{f_{\text{Kv2.1+AMIGO1}}(V_{i, \text{Mid}, \text{Kv2.1}})}{1 - f_{\text{Kv2.1+AMIGO1}}(V_{i, \text{Mid}, \text{Kv2.1}})}$ . Here  $f_{\text{Kv2.1+AMIGO1}}(V_{i, \text{Mid}, \text{Kv2.1}})$  is the

281 average conductance of Kv2.1 + AMIGO1 cells elicited at the voltage equivalent to  $V_{i, \text{Mid}, \text{Kv2.1}}$ , or  
282 the  $V_{i, \text{Mid}}$  of Kv2.1 control cells (Table 1).  $f_{\text{Kv2.1+AMIGO1}}(V_{i, \text{Mid}, \text{Kv2.1}})$  values were calculated by  
283 interpolation using the “reconstructed”, normalized Boltzmann plots in Fig. 1F, 4F, 6F, or 10F.

284 Fold  $K_{\text{eq}}$  values were calculated as the ratio of  $K_{\text{eq}, \text{Kv2.1+AMIGO1}}$  to  $K_{\text{eq}, \text{Kv2.1}}$ . Measures of  
285 conductance such as those in Figs. 1, 4, 6, and 10 only approximate the fraction of channels open  
286 out of the total amount of channels available to open and are incapable of assessing the fraction  
287 of channels that exist while remaining electrically silent. A true measure of  $K_{\text{eq}}$  is the quotient  
288 describing the fraction of channels open to the fraction of channels closed. We acknowledge that  
289 this  $G-V$ -based measure is an underestimate and not an exact approximation for  $K_{\text{eq}}$ . As such, we  
290 expect our  $\Delta G$  to be an overestimate.

291

292 Whole-cell macroscopic ionic current kinetic analysis

293 Activation time constants ( $\tau_{\text{act}}$ ) and sigmoidicity values ( $\sigma$ ) (Sack & Aldrich, 2006) were  
294 derived from the current response to the same voltage protocol used to derive  $G-V$  relations.  
295 Currents were normalized from 0-100% with the average current elicited in the 100 ms prior to  
296 the voltage step as 0% and the average current from 190-200 ms as 100%.  $\tau_{\text{act}}$  and  $\sigma$  were  
297 derived by fitting the 10-90% current rise with a power with delay function (Eqn. F):

$$I_K = A \left( 1 - e^{-\frac{t}{\tau_{\text{act}}}} \right)^\sigma \quad (\text{Eqn. F})$$

298 Eqn. F yields a curve that originates at  $I_K = 0$  and asymptotically approaches its maximum  
299 current amplitude,  $A$ , with a time course determined by time constant  $\tau_{\text{act}}$ , and sigmoidicity  $\sigma$ ,  
300 which is unitless. The  $t = 0$  mark was adjusted to 100  $\mu\text{s}$  after voltage step start to correct for  
301 filter delay and cell charging. For representation, average  $\tau_{\text{act}}$  and  $\sigma$  values are plotted against  
302 command voltage potentials. In summary plots, dots represent averages, while shaded regions  
303 bounded by bars represent the standard error of the mean.  $\tau_{\text{act}}$  and  $\sigma$  values from individual fits  
304 were statistically evaluated at each command voltage in Igor Pro software using an unpaired,  
305 two-tailed, Student’s T-test. Kv2.1 deactivation kinetics can become progressively slower after  
306 establishment of whole cell mode, similar to Shaker deactivation after patch excision (Schoppa



307 & Sigworth, 1998). Due to the ambiguity expected from this increased variability of deactivation  
308 kinetics, deactivation kinetics were not analyzed.

309

310 On-cell microscopic single channel current measurements

311 Recording solutions were prepared as follows:

| Cell type                                                                                                                                                                                                                                                                                                                                                                                                                | External Solution (in mM)                                                                                                                           | Internal Solution (in mM)                                                                                                                   |
|--------------------------------------------------------------------------------------------------------------------------------------------------------------------------------------------------------------------------------------------------------------------------------------------------------------------------------------------------------------------------------------------------------------------------|-----------------------------------------------------------------------------------------------------------------------------------------------------|---------------------------------------------------------------------------------------------------------------------------------------------|
| Kv2.1-CHO cells<br>LJP: -3.3 mV                                                                                                                                                                                                                                                                                                                                                                                          | 135 KCl, 50 HEPES, 20 KOH, 20 NaOH, 2 CaCl <sub>2</sub> , 2 MgCl <sub>2</sub> , and 0.1 EDTA, adjusted to pH 7.27 with HCl.<br>Osmolality: 346 mOsm | 155 NaCl, 50 HEPES, 20 KOH, 2 CaCl <sub>2</sub> , 2 MgCl <sub>2</sub> , 0.1 EDTA, and adjusted to pH 7.29 with HCl.<br>Osmolality: 347 mOsm |
| Osmolality was measured by a VAPRO vapor pressure osmometer 5520. For each experiment/cell type, internal and external solutions were measured side-by-side on the same day. LJP values were tabulated using Igor's patchers power tools extension version 2.15 (Dr. Francisco Mendez and Frank Wurriehausen, Max-Planck-Institut für biophysikalische chemie). LJP values were corrected for <i>post hoc</i> , offline. |                                                                                                                                                     |                                                                                                                                             |

312 Kv2.1 channel expression was achieved through 1-1.5 hours of incubation with  
313 minocycline administered in culture immediately prior to patching for Kv2.1-CHO cells. Prior to  
314 on-cell current recordings in a 50  $\mu$ L recording chamber (Warner Instruments, RC-24N), Kv2.1-  
315 CHO cells were harvested, washed, resuspended, and stored by the same protocols detailed in  
316 "*Whole-cell macroscopic ionic current measurements.*" While YFP fluorescence enabled us to  
317 detect the presence of plasma membrane-associated AMIGO1 protein, a caveat of this  
318 experiment is that we are not able to definitely state whether recordings from a single Kv2.1  
319 channel also included AMIGO1.

320 Sylgard-coated and fire-polished, thick-walled borosilicate glass (BF150-86-7.5HP;  
321 Sutter Instruments) were pulled to resistances were  $>10$  M $\Omega$ . Single channel recordings were  
322 made from on-cell patches, to avoid Kv2.1 current rundown that occurs after patch excision  
323 (Lopatin et al., 1994). Pipette capacitance compensation was used to adjust for pipette charging,  
324 but series resistance compensation was not used. Recordings were low-pass filtered at 10 kHz  
325 using the amplifier's built-in Bessel and digitized at 100 kHz.

326

327 On-cell microscopic current voltage protocols in Kv2.1-CHO cells

328 Cells were held at -100 mV and depolarized by steps to +0 mV (1000 ms) before being  
329 returned to the holding potential of -100 mV. The intersweep interval was 2 s. The average  
330 current in the 100 ms prior to voltage step was used to normalize the baseline the recording and  
331 correct for any drift. To isolate single channel currents from leak current and uncompensated  
332 capacitive transients, multiple traces without openings were averaged and then subtracted from  
333 each trace with single-channel openings.

334

335 On-cell microscopic single channel current analysis

336 Single channel amplitude histograms were obtained from corrected traces at +0 mV that  
337 were clearly bimodal, and each peak was fitted (to its half maximum) with a Gaussian function.  
338 The single channel current amplitude was defined as the difference between the peaks of the fits  
339 (see Fig. 5C, D), and a half-amplitude threshold at the midpoint between them. Occurrences of  
340 K<sup>+</sup>-sensitive sub-conductance levels were minimized to less than  $< 10\%$  compared to fully open  
341 conductance levels by the 20 mM K<sup>+</sup> extracellular solution in the pipette (Trapani et al., 2006).  
342 The sub-conductance levels were not treated explicitly during analysis, as justified in (Tilley et  
343 al., 2019). All traces reported were idealized to include only a single fully open conductance  
344 level. Idealization of traces resulted in channel event artifacts occurring when variant sub-

345 conductance currents crossed the half-amplitude threshold or when capacitive artifacts were not  
346 entirely subtracted. This resulted in overrepresentation of fast, flickery openings and closings,  
347 especially at the initiation of the voltage pulse. Hence, no conclusions were made concerning the  
348 kinetics of fast, flickery states nor the latency to first open. Conclusions were drawn only from  
349 states with longer-lived dwell time constants.

350 Open probability was calculated as the fraction of the integral of the amplitude histogram  
351 above the half-amplitude threshold. The half-amplitude threshold of idealized traces was also  
352 used to determine the open and closed dwell times. The distributions of dwell times were  
353 analyzed, fitted, and displayed by quantifying the square-root of the number of events in  
354 logarithmic bins (Sigworth & Sine, 1987). Open dwell times were well described by a single  
355 exponential component which was used to derive  $\tau_{\text{closing}}$ . Average open dwell times were also  
356 described as the geometric mean of all open dwell times. Closed dwell times appeared to have  
357 multiple exponential components and were not fit. Average closed dwell times were solely  
358 described as the geometric mean of all closed dwell times.

359

### 360 Whole-cell gating current measurements

361 Recording solutions were prepared as follows:

| Cell type                                                                                                                                                                                                                                                                                                                                                                                                                                                                                                                                                                   | External Solution (in mM)                                                                                                                      | Internal Solution (in mM)                                                                                                          |
|-----------------------------------------------------------------------------------------------------------------------------------------------------------------------------------------------------------------------------------------------------------------------------------------------------------------------------------------------------------------------------------------------------------------------------------------------------------------------------------------------------------------------------------------------------------------------------|------------------------------------------------------------------------------------------------------------------------------------------------|------------------------------------------------------------------------------------------------------------------------------------|
| Kv2.1-CHO cells<br>LJP: -3.3 mV                                                                                                                                                                                                                                                                                                                                                                                                                                                                                                                                             | 150 TEA-Cl, 41 HEPES, 1 MgCl <sub>2</sub> · 6 H <sub>2</sub> O, 1.5 CaCl <sub>2</sub> , adjusted to pH to 7.32 with NMDG. Osmolality: 311 mOsm | 90 NMDG, 1 NMDG-Cl, 50 HEPES, 5 EGTA, 50 NMDG-F, 0.01 CsCl, and adjusted to pH 7.36 with methanesulfonic acid Osmolality: 303 mOsm |
| <small>To avoid KCl contamination of the recording solution from the pH electrode, pH was determined in small aliquots that were discarded. Osmolality was measured by a VAPRO vapor pressure osmometer 5520. For each experiment/cell type, internal and external solutions were measured side-by-side on the same day. LJP values were tabulated using Igor's patchers power tools extension version 2.15 (Dr. Francisco Mendez and Frank Wurriehausen, Max-Planck-Institut für biophysikalische Chemie). LJP values were corrected for <i>post hoc</i>, offline.</small> |                                                                                                                                                |                                                                                                                                    |

362 Kv2.1 expression was achieved by 48 hours incubation with minocycline during culture.  
363 Prior to whole-cell gating current recordings in a 50  $\mu$ L recording chamber (Warner Instruments,  
364 RC-24N), Kv2.1-CHO cells were harvested, washed, resuspended, and stored by the same  
365 protocols detailed in "Whole-cell ionic current measurements." To avoid contamination of the  
366 recording chamber with Kv2.1-permeant ions, cells were given > 4 min to adhere before gently  
367 washing with 10 mL of the gating current recording solution.

368 Recording pipettes were pulled from thin-walled borosilicate glass (BF150-110-7.5HP;  
369 Sutter Instruments) to resistances measured within gating current solutions of 6-14 M $\Omega$ . Patched  
370 cells had series resistance of 14-30 M $\Omega$  (before compensation), as estimated by the value arrived  
371 at during whole-cell capacitive transient subtraction by manual adjustment of the whole-cell  
372 parameters circuit of the amplifier. Series-resistance compensation lag was set to 10  $\mu$ s. The  
373 series resistance compensation correction circuit was set to 50% when the estimated series  
374 resistance exceeded 10 M $\Omega$ . Cell capacitances were 6-10 pF, resulting in cell membrane  
375 charging time constants of <50  $\mu$ s before compensation. The series resistance compensation  
376 prediction (super-charging) circuit was not used. Remaining capacitance and Ohmic leak were  
377 subtracted offline using the average of five traces recorded during P/5.9 voltage protocols  
378 executed from a -133 mV holding potential. Low-pass filtering at 10 kHz and digitization at 10  
379 kHz were used during recordings.

380

381 Whole-cell gating current voltage protocols in Kv2.1-CHO cells

382 Gating charge-Voltage ( $Q-V$ ) profiles for CHO cells were derived from patched cells  
383 held at -100 mV and step depolarized from -100 mV to +120 mV in increments of +5 mV (100  
384 ms, to record ON gating currents) before being returned to -140 mV (100 ms, to record OFF  
385 gating currents). The intersweep interval was 2 s. Recordings were low-pass filtered at 10 kHz  
386 using the amplifier's built-in Bessel and digitized at 100 kHz. For representation, exemplar  
387 gating current traces were filtered at 2000 Hz.

388

389 Whole-cell gating current  $Q-V$  analysis

390 An early component ON gating charge movement was quantified by integrating ON  
391 gating currents in a 3.5 ms window ( $Q_{ON,fast}$ ) following the end of any obvious fast capacitive  
392 artifacts created from the test voltage step. The tail of the ON charge movement is so slow that it  
393 is difficult to integrate in these cells, making the cutoff point for integration arbitrary. This 3.5  
394 ms integration window resulted in a more positive  $Q_{ON,fast}-V$  midpoint than with a 10 ms window  
395 reported previously (Tilley et al., 2019), and more positive midpoint than the  $G-V$  relation.  
396 Differences in gating current solutions compared to prior studies may also contribute to the  
397 different midpoints reported (Jara-Oseguera et al., 2011; Scholle et al., 2004; Tilley et al., 2019).  
398 Currents were baseline-subtracted with the average current elicited during a 1 ms-long period  
399 after current decay has ceased. This window began 4 ms following the test voltage step stimuli.

400  $Q_{OFF}$  gating charge movement was quantified by integrating the area under the gating  
401 currents in a 10.5 ms window following the end of any obvious fast capacitive artifacts created  
402 from the voltage step to -140 mV. Currents were baseline-subtracted with the average current  
403 elicited during a 10 ms-long period after current decay has ceased. This window began 10 ms  
404 following the initiation of the -120 mV voltage step stimuli. To determine the amount of gating  
405 charge per cell,  $Q_{ON,fast}$  was normalized by cell-capacitance size ( $fC/pF$ ). Since the level of  
406 series-resistance induced voltage error was negligible ( $< 1$  mV), Kv2.1-CHO estimated  
407 membrane potential was only adjusted for LJP.  $Q-V$  curves were normalized to the average  $Q$   
408 value elicited from 100-120 mV steps. Adjustments and normalizations were made in Microsoft  
409 Excel.

410  $Q-V$  relations were individually fit with a 1<sup>st</sup> power Boltzmann (Eqn C.), as described  
411 previously, where  $V_{g,Mid}$  is the voltage where the function reaches half maximal conductance, and  
412  $z_g$  is valence in units of elementary charge ( $e_0$ ) associated with gating machinery rearrangements.  
413 For clarity of presentation, the average max-normalized  $Q_{ON,fast}$  and  $Q_{OFF}$  plots were  
414 "reconstructed" using the average and standard deviation from individual fits, as previously  
415 described in the methods "*Whole-cell ionic current  $G-V$  analysis*". Our  $V_{g,Mid,ON,fast}$  value is  
416 distinct from values we have reported previously (Tilley et al., 2019), potentially due to  
417 differences in recording solutions which can affect voltage sensor movement (Consiglio & Korn,  
418 2004).

419

420 Whole-cell gating current kinetic analysis

421 Time constants ( $\tau_{ON}$ ) were derived from the  $I_{g,ON}$  response to the same voltage protocol used to  
422 derive  $Q-V$  relations. Baseline-subtracted currents were fit with a double-exponential function  
423 (Eqn. G),

$$I_{g,ON} = A \left( e^{\frac{-t}{\tau_{ON}}} \right) + B - A_{rise} \left( e^{\frac{-t}{\tau_{rise}}} \right) \quad (\text{Eqn. G})$$

424 where current decays from maximum amplitude ( $A$ ) to baseline ( $B$ ) with a time constant of  $\tau_{ON}$ .  
 425 The rising phase of  $I_{g,ON}$  was accounted for by  $A_{rise}$  and  $\tau_{rise}$ . The rising phase was predicted to be  
 426 affected by the rate of cell charging and was not used in analyses. The rising phase of  $I_{g,OFF}$  was  
 427 not well fit by Eqn. G and thus  $\tau_{OFF}$  was not analyzed.

428  
 429 The voltage-dependence of the forward activation rate was determined by fitting the average  
 430  $\tau_{ON}-V$  with an exponential function (Eqn. H) on a semi-logarithmic plot. Fitting was weighted by  
 431 the standard error associated with the average.

$$\tau_{ON} = \frac{1}{\tau_{0mV,\alpha} e^{Vz_{\alpha}F/RT} + \tau_{0mV,\beta} e^{Vz_{\beta}F/RT}} \quad (\text{Eqn. H})$$

432 Eqn. H yields a curve where the rate of gating charge activation,  $\tau_{ON}$ , is predicted by the forward  
 433 ( $\tau_{0mV,\alpha}$ ) and reverse ( $\tau_{0mV,\beta}$ ) rates of activation at the neutral voltage of 0 mV and a voltage  
 434 dependence in units of elementary charge,  $z$ . All other values have the same meaning as stated in  
 435 Eqn. C. To constrain fits encompassing the entire  $\tau_{ON}-V$  plot, the forward activation rate and  
 436 charge dependence were first determined by fitting Eqn. H (with  $\tau_{0mV,\beta} = 0$ ,  $z_{\beta} = 0$ ) to the portion  
 437 of  $\tau_{ON}-V$  that was linear and steep. Since  $I_{g,ON}$  was not always well approximated by Eqn. G at  
 438 low voltages where reverse rates are suspected to be large, fit values from Eqn. H for reverse  
 439 rates were not analyzed.

440  
 441 Whole-cell gating current kinetic analysis free energy calculations

442 The estimate of the minimum Gibbs free energy of activation ( $\Delta G^{\ddagger}$ ) required to produce the  
 443 observed change in the forward rate of gating current activation,  $\tau_{0mV\alpha}$ , was determined using  
 444 (Eqn. I).  $R$  and  $T$  have been previously described.

$$\Delta G^{\ddagger} = -4 \times R \times T \times \ln \left( \frac{\tau_{0mV,aAMIGO1}}{\tau_{0mV,aControl}} \right) \quad (\text{Eqn. I})$$

445  
 446 Whole-cell gating current free energy calculations (Eqn. E, Eqn. J\*, and Eqn. J\*°)

447 The estimate of the Gibbs free energy ( $\Delta G_{AMIGO1}$ ) required for AMIGO1 to impart onto  
 448 Kv2.1 in order to produce the shift in the gating charge-voltage response was determined using  
 449 (Eqn. E), as previously described in the methods of macroscopic free energy calculations.

450  $\frac{f_{Kv2.1+AMIGO1}(V_{g,Med,Kv2.1})}{1-(f_{Kv2.1+AMIGO1}(V_{g,Med,Kv2.1}))}$  was derived using the “reconstructed”  $Q-V$  relations in Fig. 7I and

451 7T. Again,  $V_{g,Med,Kv2.1}$  represents  $V_{g,Med}$  of Kv2.1 control cells (Table 2). While we expect  
 452  $\Delta G_{AMIGO1}$  approximates made from conductance measurements and  $Q_{ON}$  recordings to be

453 overestimates, we expect  $\frac{f_{Kv2.1+AMIGO1}(V_{g,Med,Kv2.1})}{1-(f_{Kv2.1+AMIGO1}(V_{g,Med,Kv2.1}))}$  to closely approximate a  $K_{eq}$  of channel

454 activation since  $Q_{OFF}$  captures all gating current movement.  $\Delta G_{AMIGO1}$  was also calculated using  
 455 Eqn. J, which utilizes inputs derived from the 1<sup>st</sup> order Boltzmann fit to calculate a minimum  
 456 energetic input for AMIGO1.

$$\Delta G = V_{1/2} \times Q \times F \quad (\text{Eqn. J})$$

457 All variables have been previously described.  $F = 23.06$  kcal/volt gram equivalent.  $V_{1/2}$  was  
 458 defined as either  $V_{g,Med}$  (denoted by “°”, see below for methods of calculation) or  $V_{g,Med}$ . Since  
 459 this method assumes that Kv2.1 channels progress from their resting state to an activated state by  
 460 moving gating charges on 4 independent voltage sensors,  $Q$  was defined as the theoretical value  
 461 associated with ion channel activation,  $12.5 e_0$  (denoted by “\*”).  $12.5 e_0$  represents the charge

462 associated with channel activation as determined from a limiting slope analysis of the Kv2.1  
463 open probability-voltage relation (Islas & Sigworth, 1999).

464

465 Whole-cell gating current median voltage analysis (°)

466 Implicit in our calculations of  $z_g$  (and  $z_i$ ) is the assumption that voltage sensors adopt only  
467 two conformations, resting and activated, yet many more conformations are involved in Kv  
468 channel activation (Bezanilla et al., 1994; Zagotta et al., 1994). As a model-independent method  
469 to estimate the minimum  $\Delta G_{AMIGO1}$ , we employed a median voltage analysis (Chowdhury &  
470 Chanda, 2012) which makes no assumptions about the conformations underlying the gating  
471 process. Briefly, the median voltage ( $V_{g,Med}$ ) describes the voltage at which half of the gating  
472 charge is fully activated, while half of the charge is still in the resting conformation.

473 Mathematically this state can be described as the voltage that bisects the max-normalized  $Q-V$   
474 relation into two portions: a portion to the left of the bisecting line, where the area under the  
475 normalized  $Q-V$  relation is equivalent to amount of charge that has activated fully, and a portion  
476 to the right of the bisecting line, where the area above the normalized  $Q-V$  relation is equivalent  
477 to the amount of charge that has yet to activate.

478 We used the average curves describing all Kv2.1 control or Kv2.1 + AMIGO1  
479 normalized  $Q_{OFF}-V$  relations to define  $V_{g,Med}$ . Integration above and below the curve was carried  
480 out using a trapezoidal rule. For calculating areas above the curve integration values were  
481 adjusted to reflect a transposition of axis upon curve inversion. The AMIGO1-induced change in  
482 median voltage ( $\Delta V_{g,Med}$ ) from the  $Q_{OFF}-V$  relation was -9.5 mV.

483 All of the aforementioned methods for calculating the  $\Delta G$  approximate the minimum total  
484 change movement associated with conformation change (Zagotta et al., 1994), and thus these  
485 energy calculations also represent a minimum estimate of AMIGO1's impact.

486

487 Imaging

488 Fluorescence imaging instrumentation

489 Images were obtained with an inverted confocal system (Zeiss LSM 880, 410900-247-  
490 075) run by ZEN black v2.1. Images were acquired with a Plan-Apochromat 1.4 NA 63x DIC  
491 M27 oil immersion objective (Zeiss 420782-9900-799), an EC Plan-Neofluar 1.30 NA 40x  
492 apochromatic oil immersion objective (Zeiss 420462-9900-000), or a LD C-Apochromat 1.15  
493 NA 63x M27 water immersion objective (Zeiss 421887-9970-000). Images were taken in either  
494 confocal imaging mode, lambda scan mode or in Airyscan superresolution imaging mode.

495 In confocal and lambda scan imaging mode fluorescence was collected with the  
496 microscope's 32-detector gallium arsenide phosphide photomultiplier tube detector array  
497 arranged in a linear fashion with a diffraction grating to measure 400-700 nm emission in 9.6 nm  
498 bins. In confocal imaging mode, user defined detection filters sum the fluorescence from the  
499 encompassed bins, while in spectral imaging mode, the bins are left un-summed so spectral  
500 information can be retained. The point spread functions for confocal images with the 63x/1.40  
501 Oil DIC objective in the X-Y direction were 228 nm (488 nm excitation) and 316 nm (594 nm  
502 excitation). Point spread functions were calculated using ZEN black software using emissions  
503 from 0.1 nm fluorescent microspheres, prepared on a slide according to manufacturer's  
504 instructions (T7279, Thermo Fisher).

505 In Airyscan superresolution imaging mode, the gallium arsenide phosphide  
506 photomultiplier tube array of 32 elements is arranged in a compound eye (or honeycomb) fashion  
507 (Zeiss Airyscan 410900-2058-580) to improve the efficiency of light capture compared to a

508 standard confocal point detector. Images were collected and deconvolved using ZEN black  
509 software version 2.1. After deconvolution, the point spread functions for the 63x/1.40 NA  
510 objective with 488 nm excitation was 124 nm in X-Y and 216 nm in Z; with 594 nm excitation  
511 168 nm in X-Y and 212 nm in Z. For the 63x/1.2 NA objective, the point spread function with  
512 488 nm excitation was 187 nm in X-Y and 214nm in Z; the point spread function with 594 nm  
513 excitation was 210 nm in X-Y and 213 nm in Z.

514

515 GxTX–594 dose response time–lapse imaging

516 Cells were transfected, induced, and plated as described in the “*Transfection*” methods  
517 section. ~5 min prior to imaging, the cell culture exchanged in the dish containing the cell–plated  
518 coverglass was exchanged with an “imaging solution”. The imaging solution consisted of the  
519 same 3.5 mM KCl / 1 mM MgCl<sub>2</sub> solution used for electrophysiological recordings (see  
520 “*Whole–cell ionic current measurements in Kv2.1-CHO cells*”) but was additionally  
521 supplemented with 0.1% Bovine serum albumin and 10 mM glucose. Cells were washed in this  
522 solution with three, 1 mL washes. The coverslip was then mounted on an imaging chamber  
523 (Warner Instrument, Catalog # RC-24E) with vacuum grease. During time lapse imaging,  
524 indicated concentrations of GxTX–594 were applied by manual pipetting of a 100 μL bolus that  
525 was allowed to sit for 10 minutes. Manual wash–out was accomplished by flushing ~10 mL of  
526 imaging solution through the bath using an input syringe and a clearance vacuum. Solutions were  
527 added to and removed from the imaging chamber using a syringe at a flow rate of ~1 mL / 10  
528 sec. 15 minutes after wash–out, the next GxTX–594 concentration was added. Temperature  
529 inside the microscope housing was 24–28 °C.

530 Images were taken every 5 sec in Airyscan superresolution imaging mode using the 63x  
531 oil objective. The field of view that included cells both positive and negative for AMIGO1–YFP  
532 fluorescence to be used as an in-frame imaging control. YFP was excited with the 488 nm line  
533 from an argon laser (3.2 mW at installation) powered at 2% through a MBS 488/594 and MBS -  
534 405 beam splitter. YFP emission was detected through a BP 420–488 + BP 495–550 filter.  
535 GxTX–594 was excited with 594 nm helium–neon laser (0.6 mW at installation) powered at 2%  
536 through a MBS 488/594 beam splitter. GxTX–594 emission was detected through a BP 420–480  
537 and a BP 495–620 filter. Images were collected as 16-bit, 512 x 512 pixel (0.13 μm x 0.13 μm  
538 pixel size) images with no averaging and a pixel dwell of 0.85 μs. Images were exported as .czi  
539 files and the intensity data was extracted using FIJI (Schindelin et al., 2012). Representative  
540 images shown in Fig. 2 were taken with the same aforementioned parameters, but FIJI  
541 (Schindelin et al., 2012) was used to linearly adjust the brightness and contrast to optimize  
542 display.

543 To calculate the dissociation constant ( $K_d$ ) of GxTX–594 binding, the maximum,  
544 background–subtracted, fluorescence intensity following GxTX–594 addition was quantified.  
545 Plots of fluorescence intensity vs. GxTX–594 concentration curves were normalized to the  
546 maximum intensity recorded within each individual experiment and were constrained to 0 by  
547 setting the fluorescence intensity at 0 nM GxTX–594 = 0. The resulting curve was fit with a  
548 Langmuir binding isotherm to characterize maximum amplitude ( $A$ ), and  $K_d$  (Eqn. K).

$$f(x) = A * \frac{1 - x}{(K_d + x)} \quad (\text{Eqn. K})$$

549 Three individual  $K_d$  fit values were derived from independent biological replicates and the  
550 reported  $K_d$  values represents their average.

551

## 552 Environment-sensitive fluorescence and imaging

553 GxTX mutants were synthesized by solid phase peptide synthesis as described (Stewart et  
554 al., 2021; Fletcher-Taylor et al., 2020; Tilley et al., 2014) with propargylglycine (Pra)  
555 substituents at either Ser13 or Lys27. Purified GxTX mutants were conjugated with JP-N<sub>3</sub> as  
556 reported (Fletcher-Taylor et al., 2020). Stock solutions of 7 and 73  $\mu$ M, respectively, were  
557 dissolved in 1 mM Arginine buffer (1 M Arg-HCl, 50 mM Glu, pH 5.0 with NaOH) and stored at  
558 -80 °C and thawed on ice. JP conjugates were diluted to 100 nM working concentration using the  
559 same 3.5 mM KCl / 1 mM MgCl<sub>2</sub> solution used for electrophysiological recordings. Cells were  
560 transfected, induced and plated as described in the “*Transfection*” methods section and washed  
561 with imaging solution as described in “*GxTX-594 dose response time-lapse imaging*”.  
562 Following washing, the imaging solution was removed and cells were incubated in 100  $\mu$ L of  
563 GxTX-based labeling solutions for 5-10 minutes in the dark before 1 mL of the imaging solution  
564 was used to wash out the excess. All cells were imaged in 1 mL of fresh imaging solution.  
565 Temperature inside the microscope housing was 24-28 °C.

566 Images were taken in lambda scan imaging mode using the 63x oil objective. JP was  
567 excited with 543 nm helium-neon laser (0.6 mW at installation) laser powered at 60% through a  
568 MBS 488/543 beam splitter. JP emission was detected between 553-695 nm in 9 nm bin spacing.  
569 Images were collected as 16-bit, 512 x 512 pixel (0.24  $\mu$ m x 0.24  $\mu$ m pixel size) images with 2x  
570 averaging and a pixel dwell of 8.24  $\mu$ s. Images were exported as .czi files and the spectral data  
571 was extracted from the converted 8-bit image in Zen Blue.

572 To better visualize JP labeling, representative images shown in Fig. 9 were taken using  
573 confocal imaging mode. These images were not used in analysis but instead used in conjunction  
574 with the lambda scan spectral images, (which display a clear YFP emission tail in AMIGO1-  
575 positive cells) to identify the AMIGO1-YFP positive cells in each lambda scan image. YFP was  
576 excited with the 514 nm line from an argon laser (3.2 mW at installation) laser powered at 2%  
577 through a MBS 458/514/594 beam splitter. YFP emission was detected between 519-589 nm. JP  
578 was excited with 594 nm helium-neon laser (0.6 mW at installation) powered at 2% through a  
579 MBS 458/514/594 beam splitter. JP emission was detected between 599-734 nm. Images were  
580 collected as 16-bit, 512 x 512 pixel (0.24  $\mu$ m x 0.24  $\mu$ m pixel size) images with 4x averaging  
581 and a pixel dwell of 16.5  $\mu$ s. Representative image contrast and brightness settings were linearly  
582 adjusted in FIJI (Schindelin et al., 2012) to optimize display.

583

## 584 Split Pseudo-Voigt fitting

585 JP emission spectra were fit with two-component split pseudo-Voigt functions using the  
586 curve fitting software Fityk 1.3.1 (<https://fityk.nieto.pl/>), which employed a  
587 Levenberg-Marquardt algorithm. Goodness of fit was determined by root-mean-squared  
588 deviation ( $R^2$ ) values, which are listed in Supplemental Table 1 along with the parameters of  
589 each component function. Fittings for JP spectra from cells without AMIGO1-YFP included all  
590 data from 550-700 nm. To avoid YFP overlap, fittings for spectra from cells expressing  
591 AMIGO1-YFP include emission data points from 613-700 nm for GxTX Ser13Pra(JP) and 582-  
592 700 nm for GxTX Lys27Pra(JP).

593

## 594 Pearson's correlation coefficient

595 Pearson's correlation coefficient (PCC) measurements assay protein colocalization at a  
596 resolution defined by the point-spread function of the microscope, and encapsulate both signal  
597 cooccurrence and correlation (McDonald & Dunn, 2013). For PCC analysis, cells were

598 transfected and/or induced and plated as described in the “*Transfection*” methods section and  
599 washed as described in the “*GxTX–594 dose response time–lapse imaging*” section. ~5 min prior  
600 to imaging, cell culture media was exchanged with an “imaging solution”. In instances where  
601 Kv2.1 was labeled with GxTX–594, cells were then incubated in 100  $\mu$ L of 100 nM GxTX–594  
602 as described in “*Environment–sensitive fluorescence and imaging*”. Cells were incubated in the  
603 labeling solutions for 5-10 minutes before 1 mL of the imaging solution was used to wash out  
604 fluorescent dyes. All cells were imaged in 1 mL of fresh imaging solution. Temperature inside  
605 the microscope housing was 24-28 °C.

606 Confocal images were collected using the 40x oil objective. YFP was excited with the  
607 514 nm helium-neon laser (0.6 mW at installation) powered at 1% through a MBS 458/514/594  
608 beam splitter. YFP emission was detected between 519-589 nm. GxTX-594 and mRuby were  
609 excited with the 594 nm helium-neon laser powered at 2% through the same beam splitter.  
610 Emission was detected between 599-734 nm. Images were collected as optically sectioned 8-bit,  
611 2048 x 2048 pixel (0.03  $\mu$ m x 0.03  $\mu$ m pixel size) images with 2 averaging and a pixel dwell of  
612 2.06  $\mu$ s. For glass–adhered images, ROIs were drawn around the inner perimeter of each  
613 individual cell. These circular ROIs encapsulated all of the punctae, and the “negative space”  
614 between punctae. For solution–exposed membrane images, annulus-shaped regions of interest  
615 (ROIs) were drawn manually around the apparent inner and outer boundary of an individual cell  
616 to isolate the surface-exposed membrane perimeter. After automatic Costes thresholding, PCC  
617 values were calculated using the colocalization function in Zen Blue software. Costes  
618 thresholding uses an algorithm to distinguish labeled structures from background and then  
619 removes low-intensity values from analysis (Costes et al., 2004; Dunn et al., 2011). Although  
620 Costes thresholding decreases the empirical value of a PCC measurement, it is an unbiased form  
621 of thresholding designed to account for nonuniformities in background fluorescence both within  
622 a singular image and between images (Dunn et al., 2011). High PCC values are only obtained  
623 when two fluorescent signals overlap spatially and have linked fluorescent intensities (bright  
624 with bright and dim with dim). Perfect colocalization is represented by a value of +1, while a  
625 value of -1 represents fluorophores with mutually exclusive compartmentalization. A value of 0  
626 indicates no colocalization, and intermediate positive values indicate some extent of  
627 colocalization (McDonald & Dunn, 2013). Representative images in Fig. 3 and Fig. 4 were taken  
628 with the 40x objective using confocal mode and exported as 8-bit .czi files to FIJI (Schindelin et  
629 al., 2012) to linearly adjust the brightness and contrast linearly to optimize display.

630

#### 631 Coefficient of variation

632 For coefficient of variation (COV) analysis, cells were prepared as described in  
633 “*Pearson’s correlation coefficient*”. COV describes the degree of variability and non-uniformity  
634 of a fluorescence signal (Bishop et al., 2018) and has previously been used to describe the degree  
635 of punctate-like nature of an ROI as described previously (Bishop et al., 2015; Jensen et al.,  
636 2017; Kirmiz, et al., 2018a). Cells with highly clustered fluorescence will have high COV  
637 values, while cells with more uniformly distributed fluorescence will have low COV values.  
638 COV is calculated as the quotient of the standard deviation of fluorescence intensity between  
639 pixels in the ROI and the mean fluorescence intensity of the total ROI. Whenever possible, the  
640 same images collected for Pearson’s correlation analyses (by the settings detailed in “*Pearson’s*  
641 *correlation coefficient*”) were used for COV analysis. Since PCC analyses were designed to  
642 sample at a rate beyond the Nyquist limit, images were Gaussian filtered (sigma = 1) for COV  
643 analyses. Circular ROIs were drawn around the inner perimeter of the glass–adhered membrane



644 of AMIGO1–YFP expressing cells. All instances of cellular overlap and saturated intracellular  
645 expression were excluded from the ROI. Mean fluorescence intensity values and the standard  
646 deviation of the means were calculated using Zen Blue software. COV values were computed in  
647 Microsoft Excel as standard deviation divided by the mean intensity. Representative images of  
648 the Gaussian filtered data were exported as 8-bit .czi files to FIJI to linearly adjust the brightness  
649 and contrast to optimize display.

650

651 Voltage clamp fluorimetry with GxTX–594

652 Recording solutions were prepared as follows:

| Cell type                                                                                                                                                                                                                                                                                                                                                                                                                                                                                                                                                               | External Solution (in mM)                                                                                                        | Internal Solution (in mM)                                                                                      |
|-------------------------------------------------------------------------------------------------------------------------------------------------------------------------------------------------------------------------------------------------------------------------------------------------------------------------------------------------------------------------------------------------------------------------------------------------------------------------------------------------------------------------------------------------------------------------|----------------------------------------------------------------------------------------------------------------------------------|----------------------------------------------------------------------------------------------------------------|
| Kv2.1-CHO cells<br>LJP: -5.3 mV                                                                                                                                                                                                                                                                                                                                                                                                                                                                                                                                         | 3.5 KCl, 155 NaCl, 10 HEPES, 1.5 CaCl <sub>2</sub> , 1 MgCl <sub>2</sub> , adjusted to pH 7.4 with NaOH.<br>Osmolality: 315 mOsm | 70 mM CsCl, 50 mM CsF, 35mM NaCl, 1 mM EGTA, 10 mM HEPES, brought to pH 7.4 with CsOH.<br>Osmolality: 310 mOsm |
| The patch pipette contained a potassium-deficient Cs <sup>+</sup> internal pipette solution to limit outward current and reduce voltage error. Osmolality was measured by a VAPRO vapor pressure osmometer 5520. For each experiment/cell type, internal and external solutions were measured side-by-side on the same day. LJP values were tabulated using Igor's patchers power tools extension version 2.15 (Dr. Francisco Mendez and Frank Wurriehausen, Max-Planck-Institut für biophysikalische chemie). LJP values were corrected for <i>post hoc</i> , offline. |                                                                                                                                  |                                                                                                                |

653 AMIGO1–YFP and Kv2.1 channel expression and GxTX–594 labeling was achieved  
654 following the same protocols as described in (Thapa et al., 2021) and were similar to those  
655 described in “*GxTX–594 dose response time–lapse imaging*”. Briefly, instead of completely  
656 washing out GxTX–594 after incubation, the solution was diluted with 1 mL of a bovine serum  
657 albumin-deficient imaging solution for a working concentration of 9 nM GxTX-594 during  
658 experiments. Cells with obvious GxTX-594 surface staining were selected for whole-cell  
659 voltage-clamp stimulation with an EPC-10 patch clamp amplifier (HEKA) run by Patchmaster  
660 software, v2x90.2 (HEKA). Borosilicate glass pipettes (Catalog # BF 150-110-10HP, Sutter  
661 Instruments) were pulled with blunt tips to resistances less than 3.0 MΩ in these solutions. Cells  
662 were held at -100 mV for 30 images and stepped to +35 mV (which was effectively +30 mV,  
663 accounting for the -5.3 mV LJP). The voltage step stimulus was maintained until any observed  
664 change in fluorescence was complete.

665 Images were taken every 1 sec in Airyscan superresolution imaging mode using the 63x  
666 water objective. GxTX–594 was excited with 594 nm helium–neon laser (0.6 mW at installation)  
667 powered at 1% through a MBS 488/594 and MBS -405 beam splitter. GxTX–594 emission was  
668 detected through a BP 420-480 and a LP 605 filter. Images were collected as 16-bit, 256 x 256  
669 pixel (0.11 μm x 0.11 μm pixel size) images with 2x averaging and a pixel dwell of 0.85 μs.  
670 Images were exported as .czi files and the intensity data was extracted using Zen Blue.  
671 Representative images shown in Fig. 8 were taken with the same aforementioned parameters, but  
672 FIJI (Schindelin et al., 2012) was used to linearly adjust the brightness and contrast to optimize  
673 display.

674 GxTX–594 dissociation rates

675 To extract the rate of GxTX–594 dissociation ( $k_{AF}$ ) annular regions of interest were  
676 drawn manually around the solution-exposed membrane. The average fluorescence intensity was  
677 evaluated over time. Immediately following the voltage stimulus, the fluorescence intensity  
678 decreased. The decay was fit with a monoexponential function as done in (Thapa et al., 2021).  
679 For presentation, fluorescence intensity traces were subtracted by the minimum intensity value  
680 and normalized to the maximum.

681  
682 GxTX–594 dissociation rate free energy calculations (Method C)  
683 As GxTX–594 binding is determined by the stability of Kv2.1 in the earliest resting  
684 conformation, we converted the  $k_{\Delta F}$  of GxTX–594 dissociation at +30 mV into a 1.9-fold change  
685 in equilibrium constant ( $K_{eq}$ ) for resting vs. activated voltage sensors (Thapa et al., 2021). To  
686 transform the experimentally measured  $k_{\Delta F}$  into an approximate  $K_{eq}$ , we used the  $k_{\Delta F}$  vs.  $V$  vs.  
687  $P_{\text{Activated,Labeled}}$  relationship described in (Thapa et al., 2021). Briefly, experimentally measured  
688  $k_{\Delta F}$  values were interpolated onto the  $k_{\Delta F}$  vs.  $V$  relation. From this interpolation, the  $k_{\Delta F}$  values we  
689 observed, corresponded to the rates Thapa et al., might observe when stimulating to +13.3 mV  
690 (Kv2.1–Control cells) or to +24.7 mV (Kv2.1–AMIGO1 cells). Minor differences in  
691 experimental methods made it so neither of these interpolations perfectly corresponded to the  
692 expected +30 mV stimuli. Once a representative voltage was identified, an estimate of  
693  $P_{\text{Activated,Labeled}}$  was also gathered by interpolation. Here  $P_{\text{Activated,Labeled}}$  represents the probability  
694 that a GxTX–594-labeled channel occupies its activated conformation. The quotient of  
695  $P_{\text{Activated,Labeled}}$  and  $(1 - P_{\text{Activated,Labeled}})$  represents the  $K_{eq}$ .  $K_{eq, Kv2.1} / K_{eq, Kv2.1+AMIGO1} = 1.9$ .  
696 Summing this energetic perturbation over all 4 voltage sensors yields  $\Delta G_{\text{AMIGO1}}$  was -1.50  
697 kcal/mol (Eqn. L).  $R$  and  $T$  have been previously described.

$$\Delta G_{k_{\Delta F}} = -4 \times R \times T \times \ln(K_{eq}) \quad (\text{Eqn. L})$$

#### 698 Fluorescence intensity analysis

699 Fluorescence intensities were calculated from the dose-response data. Fluorescence  
700 intensity comparisons between test groups were made between in-frame controls only to control  
701 for any use- or time-dependent changes in microscope function or image acquisition that may  
702 unknowingly occur. To compare GxTX–594 intensities from CHO cells with or without  
703 AMIGO1–YFP, ROIs were drawn to encapsulate every cell for a particular test group  
704 (AMIGO1–YFP positive or negative) that was present in a single image. This resulted in two  
705 ensemble average intensities for each image, representing 3-8 cells each. Intensity values were  
706 background subtracted. GxTX–594 fluorescence intensity values originating from cells negative  
707 for AMIGO1–YFP fluorescence were normalized to 1 and the corresponding fluorescence  
708 intensities for the image-matched, GxTX–594 fluorescence intensities for AMIGO1–YFP  
709 positive cells were proportionally adjusted.

#### 710 Summary of Supplemental Materials

711 Supplemental Fig. 1 describes an electrophysiology experiment in which HEK293 cells were  
712 transfected with mouse Kv2.1 along with the auxiliary subunit for voltage-gated sodium  
713 channels, human SCN1 $\beta$ . From this negative control experiment, we saw no statistically  
714 discernable effect on the  $G$ – $V$  relation, which supports the conclusion that the  $G$ – $V$  shift seen in  
715 HEK293 cells transfected with Kv2.1 channels is an effect specifically induced by AMIGO1.  
716 Supplemental Fig. 2 is a compilation of potassium current densities measured in HEK293 and  
717 Kv2.1–CHO cells. Current densities compared across different expression and cell systems  
718 revealed that the level of variation in channel expression was greater in the transient transfection  
719 approaches used in HEK293 cells compared to the stable induction approach used in Kv2.1–  
720 CHO cells. Supplemental Fig. 3 showcases a time course of confocal images of Kv2.1–CHO  
721 cells transfected with or without AMIGO1 and treated with progressively increasing  
722 concentrations of GxTX–594 to label Kv2.1 channels. In this experiment we track GxTX–594  
723 intensity with respect to the added concentration of GxTX–594 and by fitting that relation with a

724 Langmuir binding isotherm, we extract a dissociation constant describing GxTX–594 binding  
725 affinity. From this experiment, we see no indication that AMIGO1 expression adversely affects  
726 GxTX–594 binding to Kv2.1 channels. Supplemental Table 1 is a list of the split pseudo–Voigt  
727 fitting parameters used to quantitate the emission maxima of environmentally-sensitive  
728 GxTX(JP) conjugates.

729

## 730 Results

### 731 AMIGO1 shifts the midpoint for activation of Kv2.1 conductance in HEK293 cells

732 Prior studies have found that AMIGO1 co-transfection shifts the  $G-V$  relation of GFP-  
733 tagged Kv2.1 channels (Maverick et al., 2021; Peltola et al., 2011). To determine whether  
734 AMIGO1 modulates the conductance of wild type Kv2.1 similarly, we transfected and voltage  
735 clamped cells under conditions similar to the original report (Peltola et al., 2011). HEK293 cells  
736 were transfected with either mouse Kv2.1 (mKv2.1 control cells) or mouse Kv2.1 and mouse  
737 AMIGO1 (mKv2.1 + AMIGO1 cells) (Fig. 1A). Macroscopic ionic current recordings were  
738 made in whole-cell voltage-clamp mode and  $K^+$  conductance was measured from tail currents  
739 (Fig. 1B, C). To limit the proportion of currents from endogenous voltage-dependent channels  
740 (Ponce et al., 2018; Yu & Kerchner, 1998), we set a minimum outward current density as an  
741 inclusion threshold for analysis (65 pA/pF at +85 mV). Of the cells patched, 7 of 18 mKv2.1  
742 control cells and 14 of 28 mKv2.1 + AMIGO1 cells satisfied this inclusion threshold and  
743 displayed currents consistent with a Kv2.1 delayed rectifier conductance ( $I_K$ ) (Supplemental Fig.  
744 1A, B respectively). The  $G-V$  relations were fit with a 4<sup>th</sup> power Boltzmann function (Eqn. C)  
745 (Fig. 1D, E, F), and average  $V_{i, Mid}$  (Fig. 1H) and steepness equivalents ( $z_i$ ) (Fig. 1G) were  
746 determined (Table 1). AMIGO1 did not change the steepness ( $\Delta z_i$ ) of the Kv2.1  $G-V$  relation,  
747 but did shift the  $V_{i, Mid}$  ( $\Delta V_{i, Mid}$ ) by  $-5.7 \pm 2.3$  mV (SEM). Consistent with the previous reports,  
748 these results indicate that AMIGO1 shifts activation of Kv2.1 to more negative voltages.  
749 Although this shift is smaller than the -15.3 mV shift of GFP-tagged mouse Kv2.1 induced by  
750 mouse AMIGO1-YFP (Peltola et al., 2011), it is on par with the -6.1 mV shift observed from  
751 cotransfection of human AMIGO1-mRuby2 with a rat Kv2.1-GFP protein engineered to contain  
752 a biotin acceptor peptide (LB) between S1 and S2 (Maverick et al., 2021).

753 To test if the shift in Kv2.1 conductance was a nonspecific response of transfecting  
754 HEK293 cells with a transmembrane protein, we measured the  $G-V$  relation of  $K^+$  conductance  
755 in cells transfected with Kv2.1 and the sodium channel  $\beta$  subunit SCN1 $\beta$ . SCN1 $\beta$  and AMIGO1  
756 are both single-pass transmembrane proteins with an immunoglobulin domain. Co-transfection  
757 with SCN1 $\beta$  did not detectably modulate the Kv2.1 conductance (Table 1 and Supplemental Fig.  
758 1, 2). This result suggests that modulation of Kv2.1 conductance is a specific property of  
759 AMIGO1.

760 Several aspects of the HEK293 cell co-transfection preparation complicated detailed  
761 biophysical investigations of the AMIGO1 mechanism. This included inconsistency in the  
762 expression level of Kv2.1 channels, endogenous voltage-activated conductances, and the  
763 increased variability in  $V_{i, Mid}$  measurements made with AMIGO1. The increased variability is  
764 apparent in Fig. 1H where the standard deviation of  $V_{i, Mid}$  increased from  $\pm 3.6$  mV in control  
765 cells to  $\pm 6.9$  mV in mKv2.1 + AMIGO1 cells. From our data, we note that the  $V_{i, Mid}$  values for  
766 mKv2.1 + AMIGO1 cells seemed to partition into two groups: a more negatively shifted group  
767 with an average  $V_{i, Mid}$  of -13.9 mV (Fig. 1H, dark blue), and a group similar to mKv2.1 alone  
768 with an average  $V_{i, Mid}$  of -2.5 mV (Fig. 1H, light blue). Although all cells analyzed had GFP  
769 fluorescence indicating transfection with the AMIGO1-pIRES2-GFP vector, it is possible that  
770 some cells were not expressing sufficient AMIGO1 to have a functional effect. These concerns  
771 led us to seek a different expression system for interrogating the AMIGO1-Kv2.1 interaction.

772 Figure 1. AMIGO1 modulates Kv2.1 conductance in HEK293 cells.

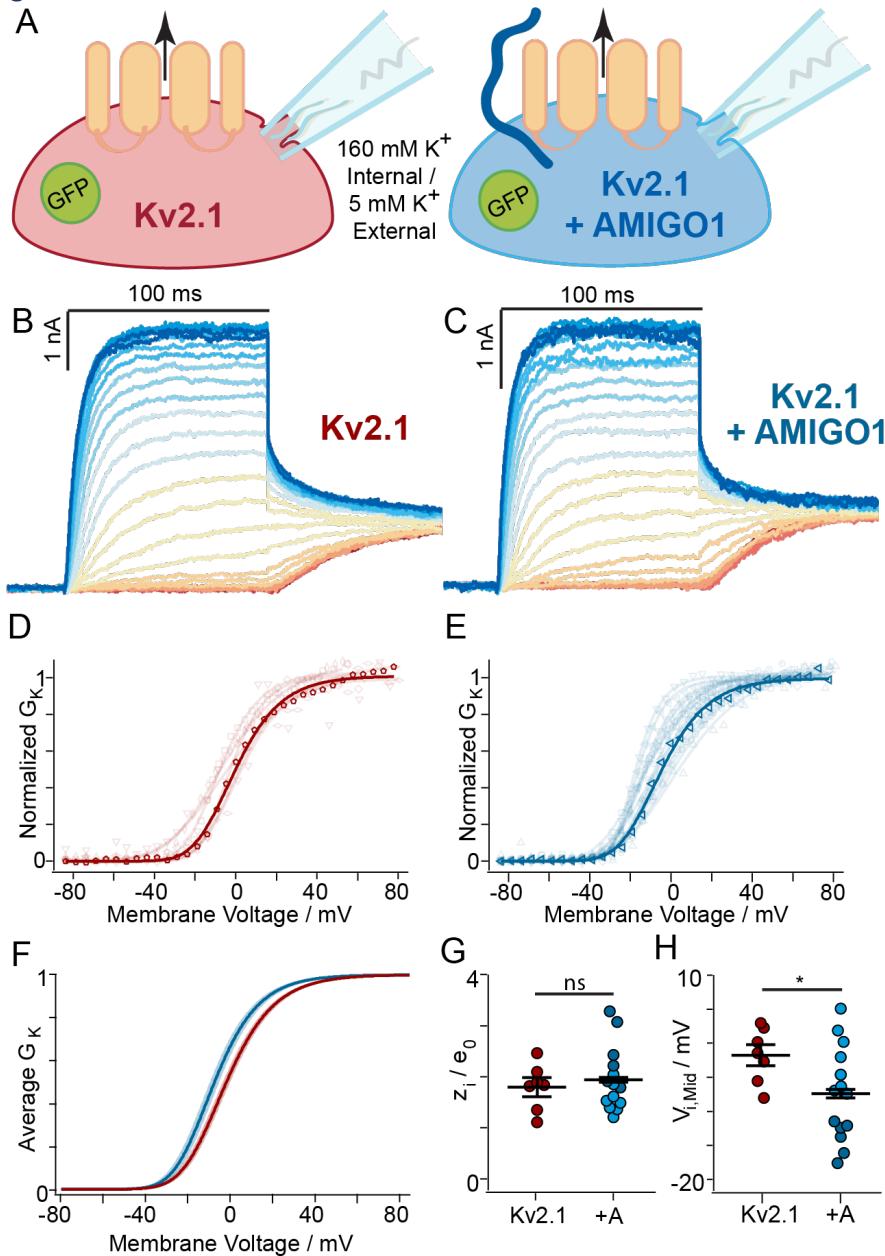

773

774 *Figure 1. AMIGO1 modulates Kv2.1 conductance in HEK293 cells.*

775 (A) Experimental set up: HEK293 cells were co-transfected 48 hours prior to whole-cell recording with either  
 776 mKv2.1 and either GFP (red) or AMIGO1-pIRES2-GFP (blue). K<sup>+</sup> ionic current was recorded (black arrow). (B, C)  
 777 Representative Kv2.1 current response elicited from a mKv2.1 control (14.8 pF) or mKv2.1 + AMIGO1 (9.6 pF)  
 778 HEK293 cell. Cells were given 100 ms voltage steps ranging from -80 mV (dark red trace) to +85 mV (dark blue  
 779 trace) and then stepped to 0 mV to record tail currents. The holding potential was -80 mV. (D, E respectively)  
 780 Normalized G-V relationships for mKv2.1 control or mKv2.1 + AMIGO1. Different symbols correspond to  
 781 individual cells and the bolded trace corresponds to the G-V derived from the exemplar cell shown in panels B, C  
 782 respectively. Solid lines represent 4<sup>th</sup> order Boltzmann relationships (Eqn. C). (F) Reconstructed 4<sup>th</sup> order  
 783 Boltzmann fits using the average V<sub>i,Mid</sub> and z<sub>i</sub> (Table 1). Shaded areas represent V<sub>i,Mid</sub> ± SEM. (G) Steepness and (H)  
 784 midpoint of 4<sup>th</sup> order Boltzmann fits. Bars are mean ± SEM. Unpaired two-tailed, T-tests p-values are in Table 1. \*:  
 785 p = ≤0.05, ns: not significant.

786 Table 1. Fourth order Boltzmann parameters for G–V relationships.

|                                               | Activation ( $G-V$ ) |                  |                     |     | $\Delta G_{AMIGO1}$ (kcal/mol)<br>(Eqn. E) |
|-----------------------------------------------|----------------------|------------------|---------------------|-----|--------------------------------------------|
|                                               | $V_{i,1/2}$ (mV)     | $V_{i,Mid}$ (mV) | $z_i$ ( $e_0$ )     | $n$ |                                            |
| <b>HEK293 cells</b>                           |                      |                  |                     |     |                                            |
| mKv2.1 + GFP                                  | $-26.8 \pm 3.0$      | $-1.7 \pm 1.4^A$ | $1.79 \pm 0.17^D$   | 7   | -0.32                                      |
| mKv2.1+ AMIGO1 + GFP                          | $-30.9 \pm 0.8$      | $-7.4 \pm 1.8^B$ | $1.95 \pm 0.16^E$   | 14  |                                            |
| mKv2.1 + SCN $\beta$ 1 + GFP                  | $-24.8 \pm 1.5$      | $0.2 \pm 1.8^C$  | $1.720 \pm 0.074^F$ | 8   |                                            |
| <b>Kv2.1-CHO cells</b>                        |                      |                  |                     |     |                                            |
| rKv2.1 + GFP                                  | $-33.4 \pm 1.7$      | $-1.8 \pm 1.2^G$ | $1.411 \pm 0.070^I$ | 20  | -0.21                                      |
| rKv2.1+ AMIGO1-YFP                            | $-42.0 \pm 3.3$      | $-7.6 \pm 1.8^H$ | $1.40 \pm 0.11^J$   | 19  |                                            |
| <b>Kv2.1-CHO cells + Mg<math>^{2+}</math></b> |                      |                  |                     |     |                                            |
| rKv2.1 + GFP                                  | $-13.8 \pm 1.8$      | $17.6 \pm 2.2^K$ | $1.51 \pm 0.11^M$   | 18  | -0.37                                      |
| rKv2.1+ AMIGO1-YFP                            | $-16.3 \pm 1.5$      | $10.2 \pm 1.0^L$ | $1.682 \pm 0.082^N$ | 23  |                                            |
| <b>Kv2.1-CHO cells + GxTX-594</b>             |                      |                  |                     |     |                                            |
| rKv2.1 + GFP                                  | $26.8 \pm 2.9$       | $73.2 \pm 3.8^O$ | $1.03 \pm 0.11^Q$   | 13  | -0.79                                      |
| rKv2.1+ AMIGO1-YFP                            | $12.9 \pm 4.4$       | $50.9 \pm 2.8^P$ | $1.27 \pm 0.14^R$   | 12  |                                            |

787 *Table 1. Fourth order Boltzmann parameters for G–V relationships.*

788 Average  $V_{i,1/2}$ ,  $V_{i,Mid}$ , and  $z_i$  values were derived from a 4<sup>th</sup> order Boltzmann fits (Eqn. C) of  $n$  individual cells. All  
789 values are given  $\pm$  SEM Corresponding p-values from unpaired, two-tailed, T-test comparisons are as follows:  
790 HEK293 Cells: AB: 0.024. BC: 0.008. AC: 0.41. DE: 0.51. EF: 0.22. DF: 0.71. Kv2.1-CHO Cells: GH: 0.012. IJ:  
791 0.95. Kv2.1-CHO Cells with Mg $^{2+}$ : KL: 0.0051. MN: 0.21. Kv2.1-CHO Cells with GxTX-594: OP: 0.00018. QR:  
792 0.19.  $\Delta G_{AMIGO1}$  was tabulated using Eqn. E, at the  $V_{i,Mid}$  for Kv2.1 control cells, or  $V_{i,Mid,Control}$ .

793 [Kv2.1 interacts with AMIGO1 in CHO cells](#)

794 To overcome some of the limitations of the transiently transfected HEK293 system, we  
795 used a Chinese Hamster Ovary K1 cell line with inducible rat Kv2.1 expression (Kv2.1-CHO)  
796 and transfected this cell line with a YFP-tagged mouse AMIGO1. Unlike HEK293 cells, CHO  
797 cells lack the presence of endogenous voltage-gated K<sup>+</sup> currents (Gamper et al., 2005). Inducible  
798 Kv2.1 expression permits tight control of current density (Trapani & Korn, 2003) and  
799 fluorescence tagging of AMIGO1 permits visualization of protein expression and localization.

800 As expression systems can influence auxiliary protein interactions with ion channels  
801 (Isom et al., 1992; Isom et al., 1995; Kazarinova-Noyes et al., 2001; McEwen & Isom, 2004;  
802 Patino et al., 2009), we assessed Kv2.1–AMIGO1 association in these CHO cells. We evaluated  
803 two hallmarks of Kv2.1 and AMIGO1 association: whether Kv2.1 expression reorganizes  
804 AMIGO1, and whether AMIGO1 and Kv2.1 colocalize (Bishop et al., 2018; Maverick et al.,  
805 2021; Peltola et al., 2011).

806 In HEK293 cells, heterologously expressed AMIGO1 localization is intracellular and  
807 diffuse (Bishop et al., 2018; Maverick et al., 2021). However, when co-expressed with Kv2.1,  
808 AMIGO1 reorganizes into punctae with Kv2.1, similar to the expression patterns in central  
809 neurons (Bishop et al., 2018; Maverick et al., 2021). To determine whether Kv2.1 similarly  
810 reorganizes AMIGO1 in CHO cells, the degree of AMIGO1–YFP reorganization was quantified  
811 using the Coefficient of Variation (COV), which captures non–uniformity of YFP localization  
812 (Kirmiz et al., 2018a). COV was quantified following the limited 1.5 h Kv2.1 induction period  
813 used in macroscopic and microscopic K<sup>+</sup> current recordings (Fig. 4, 5, 6, 10) and the prolonged  
814 48 h induction period used for gating current recordings (Fig. 7) or imaging studies (Fig. 8, 9).  
815 COVs were compared against an uninduced control (0 h induction) and against an engineered  
816 protein, ChroME-mRuby2, which contains the Kv2.1 clustering sequence, but lacks the Kv2.1  
817 voltage sensing and pore forming domains (Lim et al., 2000; Mardinly et al., 2018). COVs were  
818 evaluated from the glass-adhered, basal membrane where evidence of reorganization is most  
819 notable (Fig. 2). Both COV<sub>1.5h</sub> and COV<sub>48h</sub> were greater than the COV<sub>0h</sub> or COV<sub>ChroME-mRuby</sub>  
820 control. This result is consistent with Kv2.1 and AMIGO1 association in CHO cells.

821 Figure 2. Kv2.1 reorganizes AMIGO1 in CHO cells.

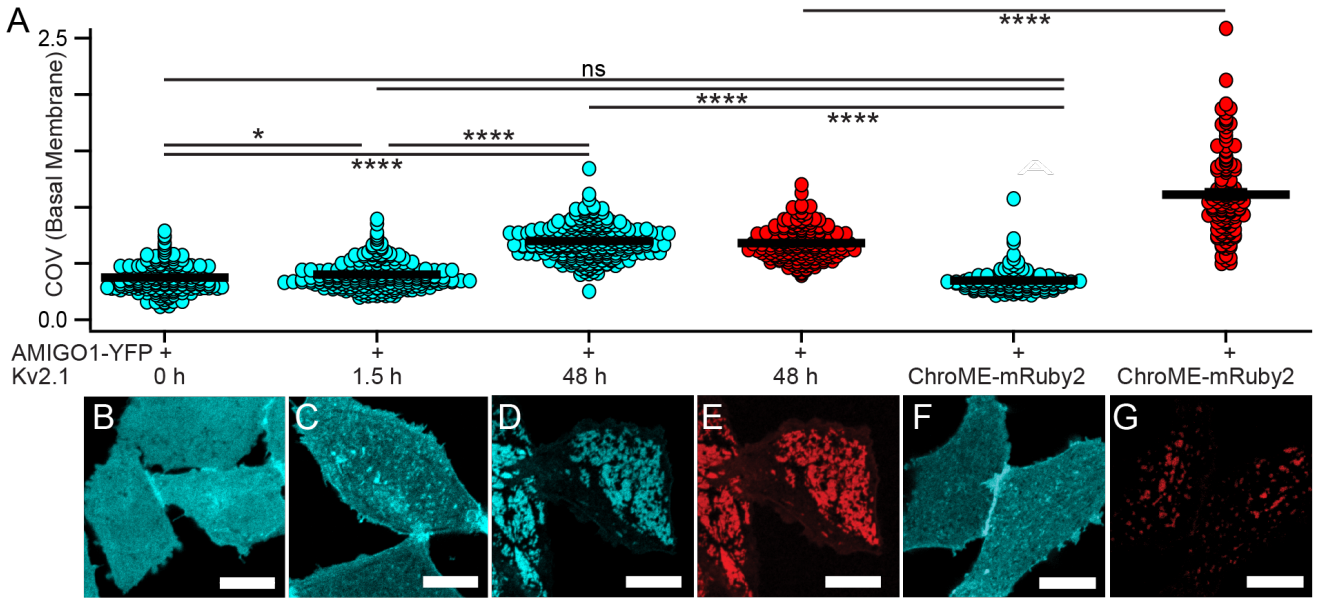

822

823 *Figure 2. Kv2.1 reorganizes AMIGO1 in CHO cells.*

824 (A) Coefficient of variation of fluorescence from AMIGO1–YFP (blue circles), GxTX–594 (red circles), or  
 825 ChroME–mRuby2 (red circles). Bars are mean  $\pm$  SEM. COV measurements were calculated from confocal images  
 826 acquired from the glass–adhered basal membrane of the cell (exemplar confocal images in B–G). All cells were  
 827 transfected with AMIGO1–YFP 48 h prior to imaging. AMIGO1–YFP fluorescence from cells (B) not induced for  
 828 Kv2.1 expression ( $COV_{0h} = 0.3755 \pm 0.0097$ ,  $n = 171$ ), (C) induced 1.5 h for Kv2.1 expression ( $COV_{1.5h} = 0.4023 \pm$   
 829  $0.0077$ ,  $n = 244$ ), (D) induced 48 h for Kv2.1 expression ( $COV_{48h} = 0.7007 \pm 0.0086$ ,  $n = 278$ ). (E) GxTX–594  
 830 labeling of the cells in panel D ( $COV_{48h(GxTX-594)} = 0.682 \pm 0.010$ ,  $n = 197$  cells). (F) AMIGO1–YFP fluorescence  
 831 from CHO cells lacking Kv2.1 co-transfected with ChroME–mRuby2 ( $COV = 0.3510 \pm 0.0092$ ,  $n = 129$  cells). (G)  
 832 ChroME–mRuby2 fluorescence of cells in panel F ( $COV_{(ChroME-mRuby2)} = 1.114 \pm 0.032$ ,  $n = 129$ ). Individual cell data  
 833 from 4 separate transfections were combined for each experimental condition. All scale bars are  $10 \mu m$ . (Statistics)  
 834 Individual cells were treated as biologically distinct samples for statistical evaluation; a nested/hierarchical model  
 835 was not used. \*\*\*\*:  $p = \leq 0.0001$ , \*:  $p = \leq 0.05$ . Two–tailed, T–test:  $COV_{0h} \neq COV_{1.5h}$ ,  $p = 0.03$ .  $COV_{48h} \neq COV_{1.5h}$ ,  
 836  $p = 2.2 \times 10^{-95}$ .  $COV_{48h} \neq COV_{0h}$ ,  $p = 1.1 \times 10^{-83}$ .  $COV = COV_{0h}$ ,  $p = 0.067$ .  $COV \neq COV_{1.5h}$ ,  $p = 2.47 \times 10^{-5}$ .  $COV \neq$   
 837  $COV_{48h}$ ,  $p = 1.01 \times 10^{-88}$ .  $COV_{48h(GxTX-594)} \neq COV_{(ChroME-mRuby2)}$ ,  $p = 1.4 \times 10^{-24}$ .



838 We also assessed AMIGO1–YFP and Kv2.1 colocalization using the Pearson’s  
839 correlation coefficient (PCC) (Manders et al., 1992). Surface-expressing Kv2.1 on live cells was  
840 labeled with GxTX Ser13Cys(Alexa594) (referred to from here on as GxTX–594), the conjugate  
841 of the voltage sensor toxin guangxitoxin-1E derivative Ser13Cys with the maleimide of  
842 Alexa594 (Thapa et al., 2021). As auxiliary subunits can impede binding of toxins to voltage-  
843 gated ion channels (Das et al., 2016; Gilchrist et al., 2013; Maffie et al., 2013; Messner et al.,  
844 1986; Messner & Catterall, 1986; Wilson et al., 2011), we tested whether AMIGO1 impacted  
845 GxTX–594 binding to Kv2.1. However, under conditions where AMIGO1 modulates most, if not  
846 all, Kv2.1 subunits (Fig. 7, Fig. 8), we found no evidence that AMIGO1 impedes GxTX–594  
847 binding to Kv2.1 (Supplemental Fig. 3). Colocalization between AMIGO1–YFP and GxTX–594  
848 was apparent as  $PCC_{48h}$ , measured from the glass-adhered basal membrane, was greater than the  
849 negative control,  $PCC_{ChroME-mRuby2}$  (Fig. 3K–Q). With a limited 1.5 h induction, Kv2.1 was  
850 difficult to detect at the glass-adhered basal membrane surface, so we moved the confocal  
851 imaging plane further from the cover glass to image Kv2.1 on apical cell surfaces where GxTX-  
852 594 labeling was more apparent. On these apical surfaces,  $PCC_{1.5h}$  and  $PCC_{48h}$  were greater than  
853  $PCC_{0h}$  (Fig. 3A–J), consistent with some colocalization of AMIGO1–YFP and Kv2.1. While the  
854 increase at the  $PCC_{1.5h}$  is minimal, the limited GxTX-594 signal skews signal proportionality,  
855 and is expected to depress the PCC value (Dunn et al., 2011). Altogether, the reorganization of  
856 AMIGO1 and colocalization with Kv2.1 indicate that AMIGO1 and Kv2.1 interact in the CHO  
857 cells used for  $K^+$  current recordings and for gating current measurements.  
858

859 Figure 3. AMIGO1 colocalizes with Kv2.1 in CHO cells.

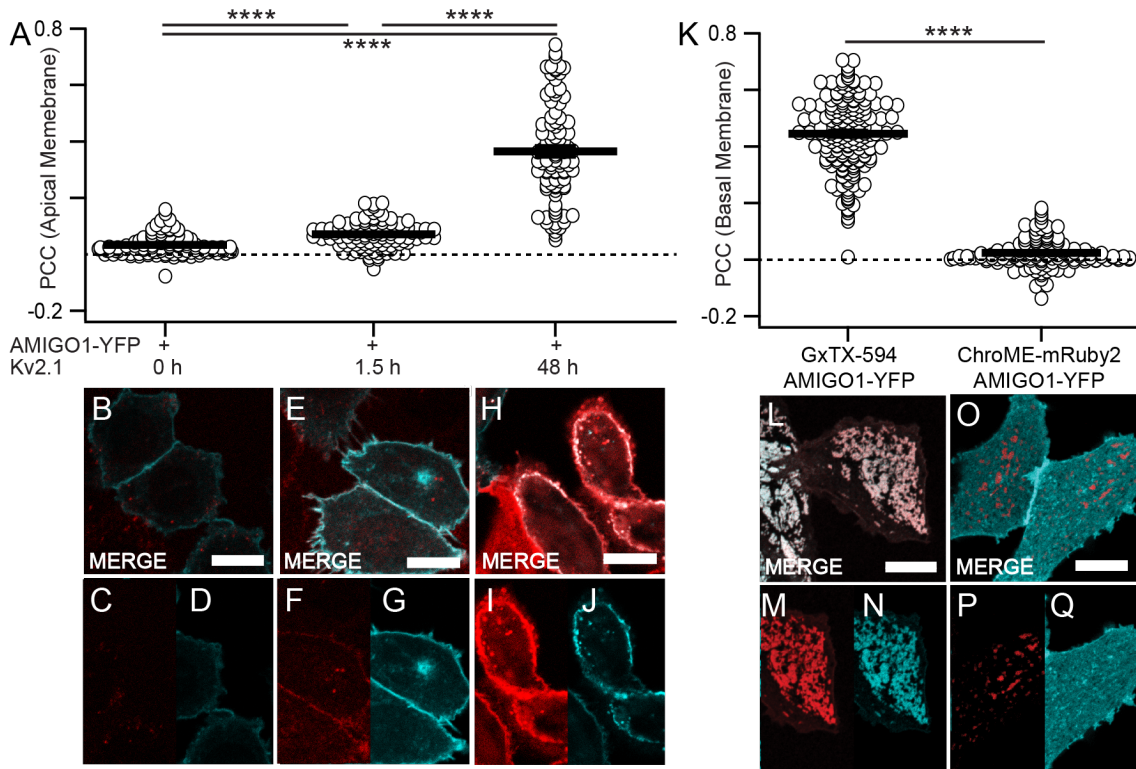

860

861 *Figure 3. AMIGO1 colocalizes with Kv2.1 in CHO cells.*

862 (A) Costes thresholded, Pearson's colocalization between AMIGO1-YFP and GxTX-594 at the solution-exposed  
 863 membrane of the cell following, from left to right, 0, 1.5, or 48 h of Kv2.1 induction (exemplar Confocal images in  
 864 B-J, brightness/contrast display settings were set to optimize visualization of GxTX-594 labeling at 1.5 h). Because  
 865 1.5 h of Kv2.1 induction significantly reduces the number of channels available for GxTX-594 labeling, the PCC  
 866 between AMIGO1-YFP and GxTX-594 was best assessed at a focal plane  $\sim 1 \mu\text{m}$  above the glass-adhered cell  
 867 surface. On these lateral surfaces, GxTX-594 labeling of surface-expressing Kv2.1 channels were isolated by  
 868 annular regions of interest bounded by concentric circles drawn around the inner and outer periphery of the cell  
 869 membrane. From left to right:  $PCC_{0h} = 0.0344 \pm 0.0036, \geq 0$  ( $p$ -value =  $6.7 \times 10^{-16}$ , one-tailed, T-test),  $n = 103$ ,  
 870  $PCC_{1.5h} = 0.0718 \pm 0.0042, \geq 0$  ( $p$ -value = 0, one-tailed, T-test),  $n = 118$ , and  $PCC_{48h} = 0.365 \pm 0.017, \geq 0$  ( $p$ -value  
 871 = 0, one-tailed, T-test),  $n = 101$ . Individual cell data from 3 separate transfections were combined for each  
 872 experimental condition. (B, C, D respectively) Merge overlay (white, B) shows colocalization between GxTX-594  
 873 (C) and AMIGO1-YFP (D) in cells not induced for Kv2.1 expression. (E, F, G respectively) Merge overlay (white,  
 874 E) shows colocalization between GxTX-594 (F) and AMIGO1-YFP (G) in cells induced for Kv2.1 expression 1.5 h  
 875 prior to imaging. (H, I, J respectively) Merge overlay (white, H) shows colocalization between GxTX-594 (I) and  
 876 AMIGO1-YFP (J) in cells induced for Kv2.1 expression 48 h prior to imaging. (K) Costes thresholded, Pearson's  
 877 colocalization between (left to right) AMIGO1-YFP/GxTX-594 and AMIGO1-YFP/ChroME-mRuby2 at the glass-  
 878 adhered basal membrane of the cell. Exemplar images in Fig. 2 D-G. From left to right:  $PCC_{GxTX-594} = 0.4449 \pm$   
 879  $0.0090, \geq 0$  ( $p$ -value = 0, one-tailed, T-test),  $n = 195$ , from 3 transfections;  $PCC_{ChroME-mRuby2} = 0.0242 \pm 0.0045, \geq 0$   
 880 ( $p$ -value =  $1.7 \times 10^{-7}$ , one-tailed, T-test),  $n = 129$ , from 4 transfections. (Statistics and plotting) All scale bars are 10  
 881  $\mu\text{m}$ . Arithmetic means and standard errors are plotted. Individual cells were treated as biologically distinct samples  
 882 for statistical evaluation; a nested/hierarchical model was not used. \*\*\*\*:  $p = \leq 0.0001$ . Two-tailed, T-test:  $PCC_{0h} \neq$   
 883  $PCC_{1.5h}, p = 7.4 \times 10^{-11}$ ,  $PCC_{1.5h} \neq PCC_{48h}, p = 8.8 \times 10^{-33}$ ,  $PCC_{0h} \neq PCC_{48h}, p = 6.4 \times 10^{-37}$ .  $PCC_{GxTX-594} \neq PCC_{ChroME-}$   
 884  $mRuby2, p = 3.3 \times 10^{-121}$ .  $PCC_{1.5h} \neq PCC_{ChroME-mRuby2}, p = 1.3 \times 10^{-13}$ .  $PCC_{0h} \neq PCC_{ChroME-mRuby2}, p = 0.039$ .

885 **AMIGO1 shifts the midpoint of activation of Kv2.1 conductance in CHO cells**

886 To determine whether AMIGO1 affected the macroscopic  $K^+$  conductance in Kv2.1–  
887 CHO cells, we conducted whole-cell voltage clamp recordings. Cells were transfected with GFP  
888 (Kv2.1 control) or with AMIGO1–YFP (Kv2.1 + AMIGO1 cells) and identified for whole-cell  
889 voltage clamp based on the presence of cytoplasmic GFP fluorescence or plasma membrane-  
890 associated YFP fluorescence, respectively (Fig. 4A).  $K^+$  conductance was measured from tail  
891 currents (Fig. 4B, C) and the resulting  $G$ – $V$  relations were fit with a 4<sup>th</sup> power Boltzmann  
892 function (Eqn. C) (Fig. 4D, E, F) (Table 1). In Kv2.1 control cells, the  $V_{i, Mid}$  was -1.8 mV (Fig.  
893 4H), consistent with prior reports of  $V_{i, Mid}$  ranging from -3 mV to +8 mV in CHO cells (Cobb et  
894 al., 2016; Maverick et al., 2021; Scholle et al., 2004; Tilley et al., 2014). In Kv2.1 + AMIGO1  
895 cells, the  $V_{i, Mid}$  was negatively shifted (Fig. 4H) producing a mean  $\Delta V_{i, Mid}$  of  $-5.7 \pm 2.2$  mV  
896 (SEM) compared to control (Table 1).

897 To test if AMIGO1 also alters the rate of activation for Kv2.1 conductance we analyzed  
898 macroscopic activation kinetics. 10-90% of the rise of Kv2.1 currents following a voltage step  
899 (Fig. 4A, B) was fit with the power of an exponential function (Eqn. F), which has three free  
900 parameters: the final amplitude ( $A$ ), the sigmoidicity ( $\sigma$ ) which quantifies delay before current  
901 rise, and the activation time constant ( $\tau_{act}$ ) which is determined by the rate of the slowest step in  
902 the activation path.  $\sigma$  was not significantly altered by AMIGO1 (Fig. 4J, L, N), suggesting that  
903 the Kv2.1 activation pathway retains a similar structure with AMIGO1 (Tilley et al., 2019). At a  
904 subset of voltages less than +70 mV, AMIGO1 expression accelerated activation, decreasing  $\tau_{act}$   
905 (Fig. 4I, K, M). A similar trend was observed with AMIGO1–mRuby2 and GFP–Kv2.1–LB in  
906 HEK293 cells (Maverick et al., 2021). A model of Kv2.1 activation kinetics suggests that voltage  
907 sensor dynamics influence  $\tau_{act}$  below  $\sim +70$  mV, and that at more positive voltages a slow pore  
908 opening step limits kinetics (Tilley et al., 2019). From this result we see no indication that  
909 AMIGO1 modulates the conformational change associated with the slow pore opening step, but  
910 do find evidence that suggests AMIGO1 speeds voltage sensor movement.

911 Figure 4. AMIGO1 shifts the midpoint and speeds activation of the Kv2.1 conductance in CHO  
912 cells.

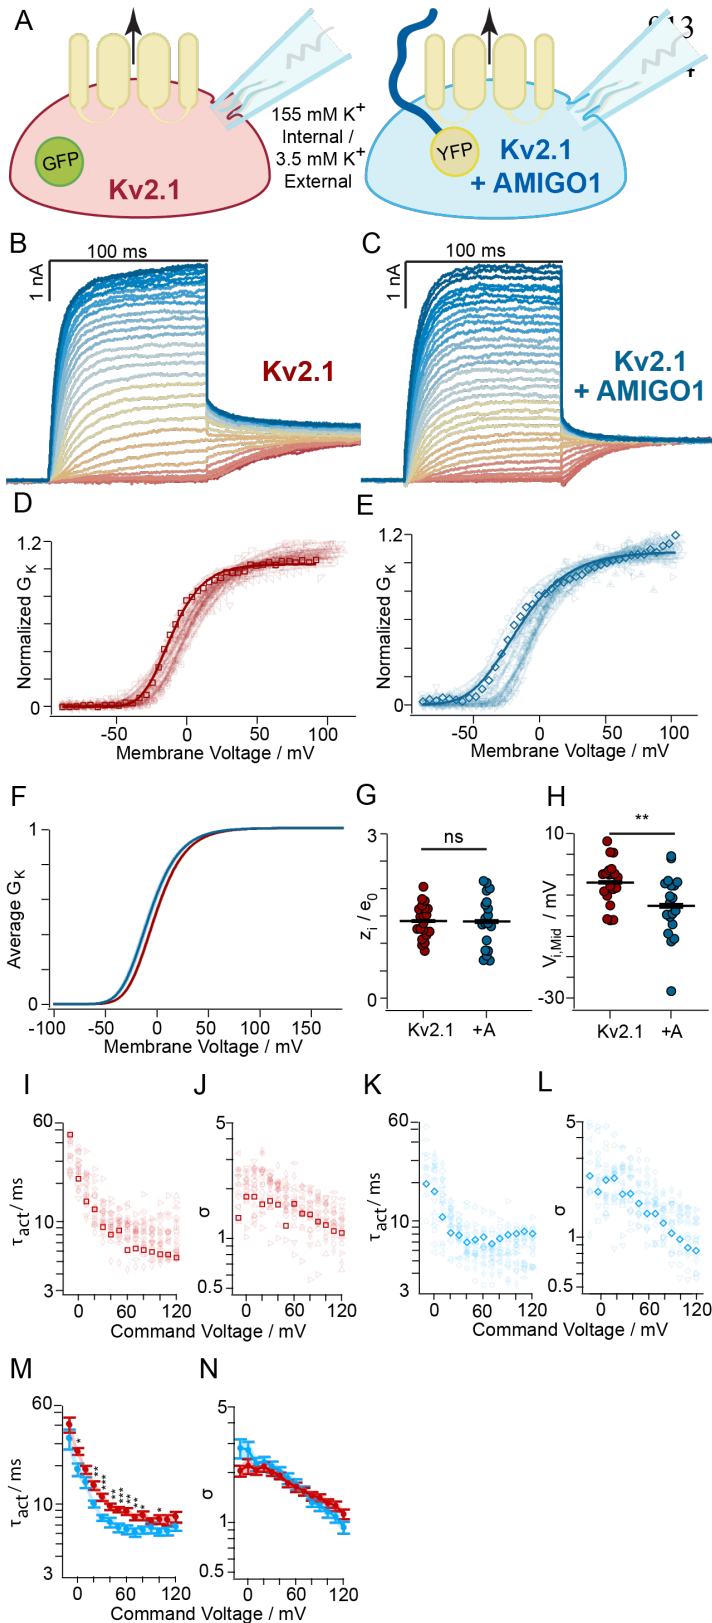

915 *Figure 4. AMIGO1 shifts the midpoint and speeds activation of the Kv2.1 conductance in CHO*  
916 *cells.*

917 (A) Experimental set up: Kv2.1–CHO cells were transfected 48 hours prior to whole-cell recording with either GFP  
918 (red) or AMIGO1–YFP (blue). Kv2.1 expression was induced by incubation with minocycline for 1–2 hours prior to  
919 recording. Macroscopic  $K^+$  ionic current was recorded (black arrow). (B, C) Representative Kv2.1 current response  
920 elicited from a Kv2.1 control (6.0 pF) or Kv2.1 + AMIGO1 (14.5 pF) cell. Cells were given 100 ms voltage steps  
921 ranging from -80 mV (dark red trace) to +120 mV (dark blue trace) and then stepped to 0 mV to record tail currents.  
922 The holding potential was -100 mV. (D, E **respectively**) Normalized  $G$ – $V$  relationships for Kv2.1 control or Kv2.1  
923 + AMIGO1 cells. Different symbols correspond to individual cells and the bolded trace corresponds to the  $G$ – $V$   
924 derived from the exemplar cell shown in panels B, C respectively. Solid lines represent 4<sup>th</sup> order Boltzmann  
925 relationships (Eqn. C). (F) Reconstructed 4<sup>th</sup> order Boltzmann fits using the average  $V_{i, Mid}$  and the average  $z_i$  (Table  
926 1). Shaded areas represent  $V_{i, Mid} \pm SEM$ . (G) Steepness and (H) midpoint of 4<sup>th</sup> order Boltzmann fits. Bars are mean  
927  $\pm SEM$ . (I, K **respectively**)  $\tau_{act}$  and (J, L **respectively**)  $\sigma$  from fitting of Eqn. F onto the activation phase of Kv2.1  
928 control ( $n = 19$ ) or Kv2.1 + AMIGO1 ( $n = 18$ ) currents. The bolded symbols correspond to the representative current  
929 response shown in (B/D or C/E). (M) Mean  $\tau_{act}$  and (N)  $\sigma$  following each command voltage step. Bars are mean  $\pm$   
930 SEM. (Statistics G, H, M, N) Unpaired two-tailed, T–test p-values are in Table 1. \*\*\*:  $p = \leq 0.001$ , \*\*:  $p = \leq 0.01$ ,  
931 \*:  $p = \leq 0.05$ , ns: not significant.

932 Effects of AMIGO1 on pore opening conformational changes were not apparent in single  
933 channel recordings

934 To more directly assess whether the pore opening step of the Kv2.1 activation pathway is  
935 modulated by AMIGO1, we analyzed pore openings of single Kv2.1 channels (Fig. 5A, B).  
936 Neither the single channel current amplitude (Fig. 5C, D, E) nor the intra-sweep open  
937 probability (Fig. 5F) were significantly impacted by AMIGO1. AMIGO1 did not impact the  
938 single channel open or closed dwell times in a statistically significant manner (Fig. 5 G-L). In all  
939 analyses, effects of AMIGO1 on single channel openings were not apparent. The lack of a  
940 detectable difference in open probability was not surprising, given the substantial variability in  
941 open probability from patch to patch. These results constrain any impact of AMIGO1  
942 coexpression on Kv2.1 pore opening to be smaller than the variability in these single channel  
943 measurements.

944 Figure 5. Effects of AMIGO1 on pore opening conformational changes were not apparent  
945 in single channel recordings.

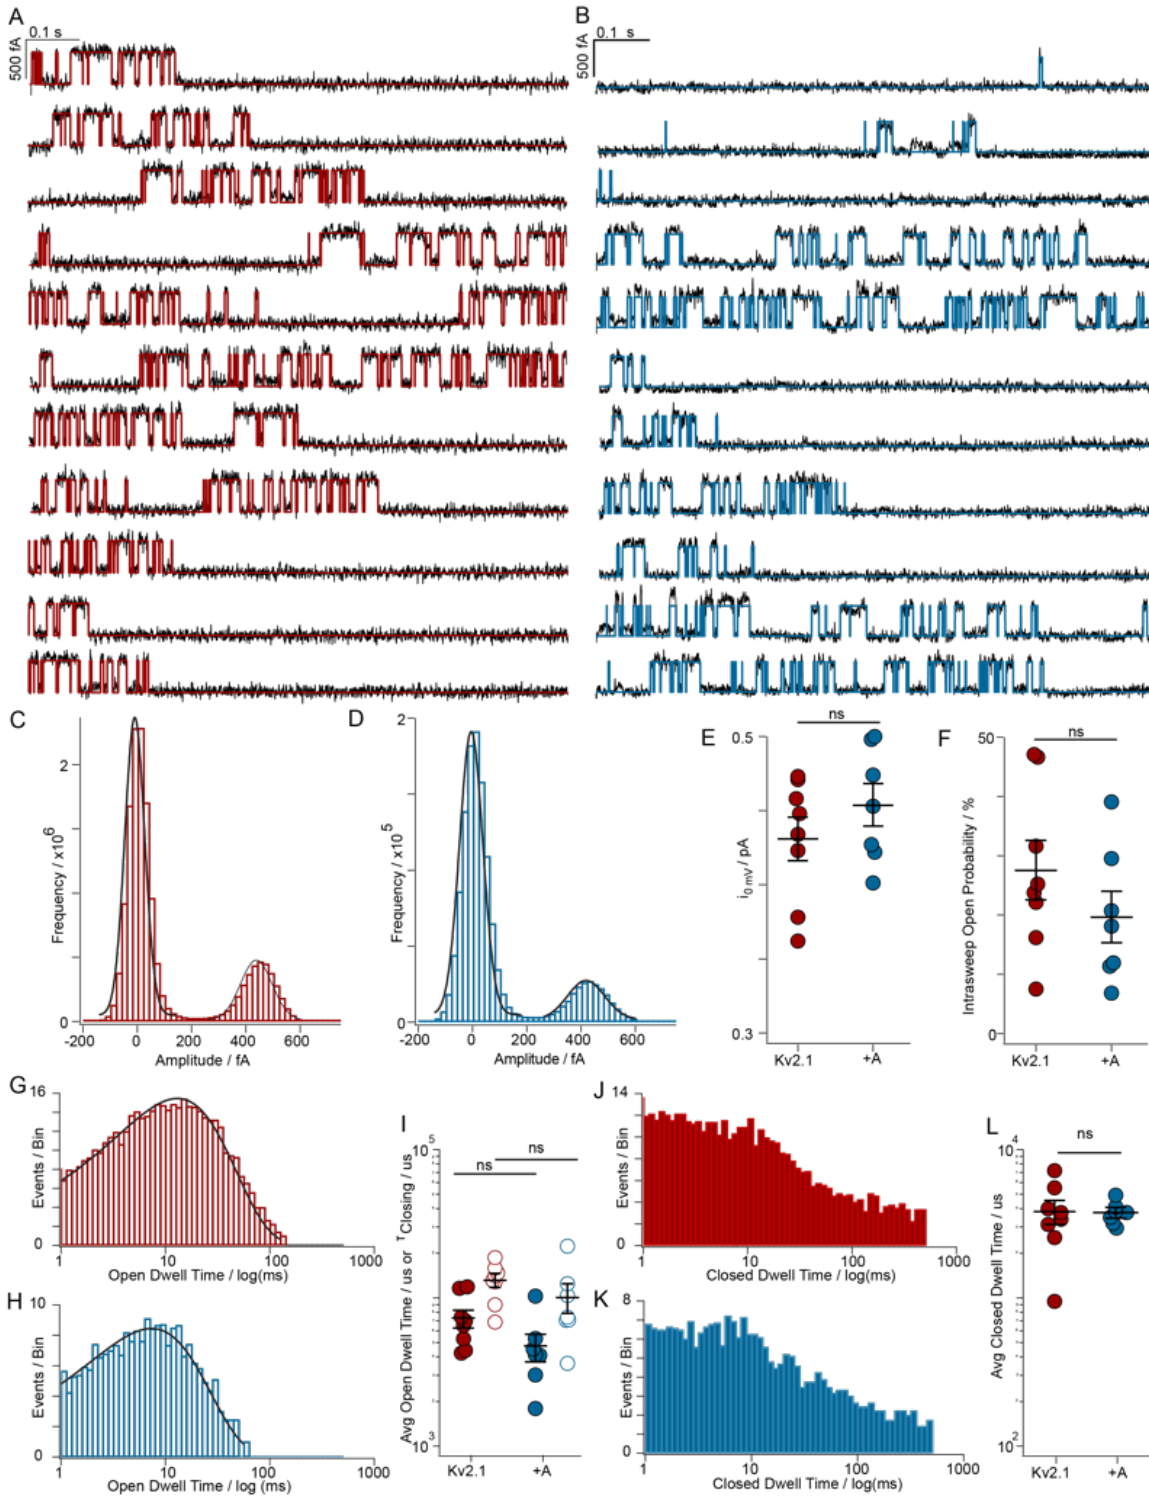

946

947 *Figure 5. Effects of AMIGO1 on pore opening conformational changes were not apparent in single*  
948 *channel recordings.*

949 **(A, B)** Representative single channel current responses from Kv2.1-CHO cells transfected 48 hours prior to on-cell  
950 recording with either GFP (red) or AMIGO1-YFP (blue). Kv2.1 expression was induced by incubation with  
951 minocycline for 1.5 hours prior to recording. Cells were given a 1 s long, 0 mV step from a -100 mV holding  
952 potential to stimulate Kv2.1 openings. Current responses were subtracted for leak currents and capacitive transients.  
953 Smooth lines represent idealization that was used to distinguish fully open state from the fully closed state. 8 Kv2.1-  
954 control single channel patches and 7 Kv2.1+AMIGO1 single channel patches were analyzed. **(C, D respectively)**  
955 Representative current histograms at +0 mV from the patched cell in A/B. Solid lines represent Gaussian fits to  
956 histogram peaks; the peak amplitudes of which were used to idealize the fully open and closed state. **(E)** Mean  
957 single channel current amplitude from Gaussian histogram fits to individual patches. Kv2.1 control:  $4.3 \times 10^{-13} \pm$   
958  $1.4 \times 10^{-14}$  A (SEM). Kv2.1 + AMIGO1:  $4.5 \times 10^{-13} \pm 1.5 \times 10^{-14}$  A (SEM). Bars are mean  $\pm$  SEM. Unpaired two-tailed,  
959 T-test p-value > 0.05. **(F)** Open probability of Kv2.1 channels was determined from the integral of current  
960 histograms above half-amplitude threshold. Kv2.1 control:  $28 \pm 4.9\%$  (SEM). Kv2.1 + AMIGO1:  $20 \pm 4.2\%$  (SEM).  
961 Bars are mean  $\pm$  SEM. Two-tailed, T-test p-value > 0.05. **(G, H respectively)** Log-binned open dwell-time  
962 distributions and single exponential fits for Kv2.1 control or Kv2.1 + AMIGO1 cells. The distributions of open  
963 dwell times were determined from idealized currents which were classified as either open or closed using a half-  
964 amplitude threshold criterion. Y axis is square root scaling. **(I)** Open dwell times from all individual openings in a  
965 single patch were derived in two ways: from the arithmetic mean of all individual open dwell times and also from a  
966 single exponential fit of the log square root transform of all open dwell times (Sigworth & Sine, 1987). Arithmetic  
967 mean open dwell times (closed circles) Kv2.1 control:  $12000 \pm 1000 \mu\text{s}$  (SEM). Kv2.1 + AMIGO1,  $9400 \pm 2100 \mu\text{s}$   
968 (SEM). Microscopic time constant of closing from individual patches derived from single exponential fits (open  
969 circles). Kv2.1 control:  $13000 \pm 1300 \mu\text{s}$  (SEM). Kv2.1 + AMIGO1:  $9980 \pm 2300 \mu\text{s}$  (SEM). Bars are mean  $\pm$  SEM.  
970 Unpaired two-tailed, T-test p-value > 0.05. **(J, K respectively)** Log-binned closed dwell time distribution for Kv2.1  
971 control or Kv2.1 + AMIGO1 cells. Similar to the open dwell time distributions, the distributions of closed dwell  
972 times were determined from idealized currents. **(L)** Arithmetic mean closed dwell time spanning all individual  
973 openings in a single patch (closed circles). Kv2.1 control:  $3800 \pm 670 \mu\text{s}$  (SEM). Kv2.1 + AMIGO1:  $3730 \pm 250 \mu\text{s}$   
974 (SEM). Bars are mean  $\pm$  SEM. Two-tailed, T-test p-value > 0.05.



975 A voltage sensor toxin enhances modulation AMIGO1 of the Kv2.1 conductance

976 To test whether AMIGO1 modulation is dependent on the conformation of the voltage  
977 sensors, we altered voltage sensor movement with a voltage sensor toxin. GxTX binds to the  
978 voltage sensing domain of Kv2.1 (Milescu et al., 2009), such that exit from the channel's earliest  
979 resting conformation is the primary limitation to opening (Tilley et al., 2019). If AMIGO1  
980 modulates the earliest resting conformation of the voltage sensors, then AMIGO1 might have a  
981 greater impact when exit from that conformation limits opening. Hence, GxTX would be  
982 expected to amplify the AMIGO1 impact on the pore opening equilibrium. Alternately, if  
983 AMIGO1 acts directly on pore opening, the AMIGO1 impact on the pore opening equilibrium  
984 should be insensitive to voltage sensor modulation. To distinguish between these possibilities,  
985 we measured AMIGO1 modulation in the presence of GxTX-594, a GxTX derivative that acts  
986 by the same mechanism as GxTX (Thapa et al., 2021) and binds Kv2.1 similarly with or without  
987 AMIGO1 (Supp. Fig. 3). We applied 100 nM GxTX-594 to cells and activated the Kv2.1  
988 conductance with 100-ms activating pulses, much shorter than the  $>2$  second time constants of  
989 GxTX-594 dissociation at extreme positive voltages (Thapa et al., 2021), and we saw no  
990 evidence of GxTX-594 dissociation. The AMIGO1  $\Delta V_{i, \text{Mid}}$  of  $-22.1 \pm 4.8$  (SEM) with GxTX-  
991 594 was distinct from the AMIGO1  $\Delta V_{i, \text{Mid}}$  of  $-5.7 \pm 2.2$  mV (SEM) without GxTX-594 ( $p =$   
992  $0.00018$ , unpaired, two-tailed T-test), suggesting AMIGO1 has a greater impact on the Kv2.1  
993 conductance when voltage sensor movement was altered. The  $\tau_{\text{act}}$  values of Kv2.1 + AMIGO1  
994 cells were not statistically different from Kv2.1 control cells (Fig. 6M). Most  $\sigma$  values were not  
995 statistically different with the presence of AMIGO1 (Fig. 6J, L, N). We calculated a pore  
996 opening equilibrium constant ( $K_{eq}$ ) from Boltzmann fits to  $G-V$  relations and estimated that  
997 AMIGO1 shifts  $K_{eq}$  for pore opening by 1.4-fold under control conditions or 3.7-fold in 100 nM  
998 GxTX. This result indicates that the impact AMIGO1 has on the Kv2.1 conductance is dependent  
999 on the details of the activation path. Further this result indicates that AMIGO1 opposes the action  
1000 of GxTX, suggesting that AMIGO1 may destabilize the earliest resting conformations of Kv2.1  
1001 voltage sensor.

1002 Figure 6. The voltage sensor toxin, GxTX-594, enhances modulation by AMIGO1 on Kv2.1  
 1003 conductance.

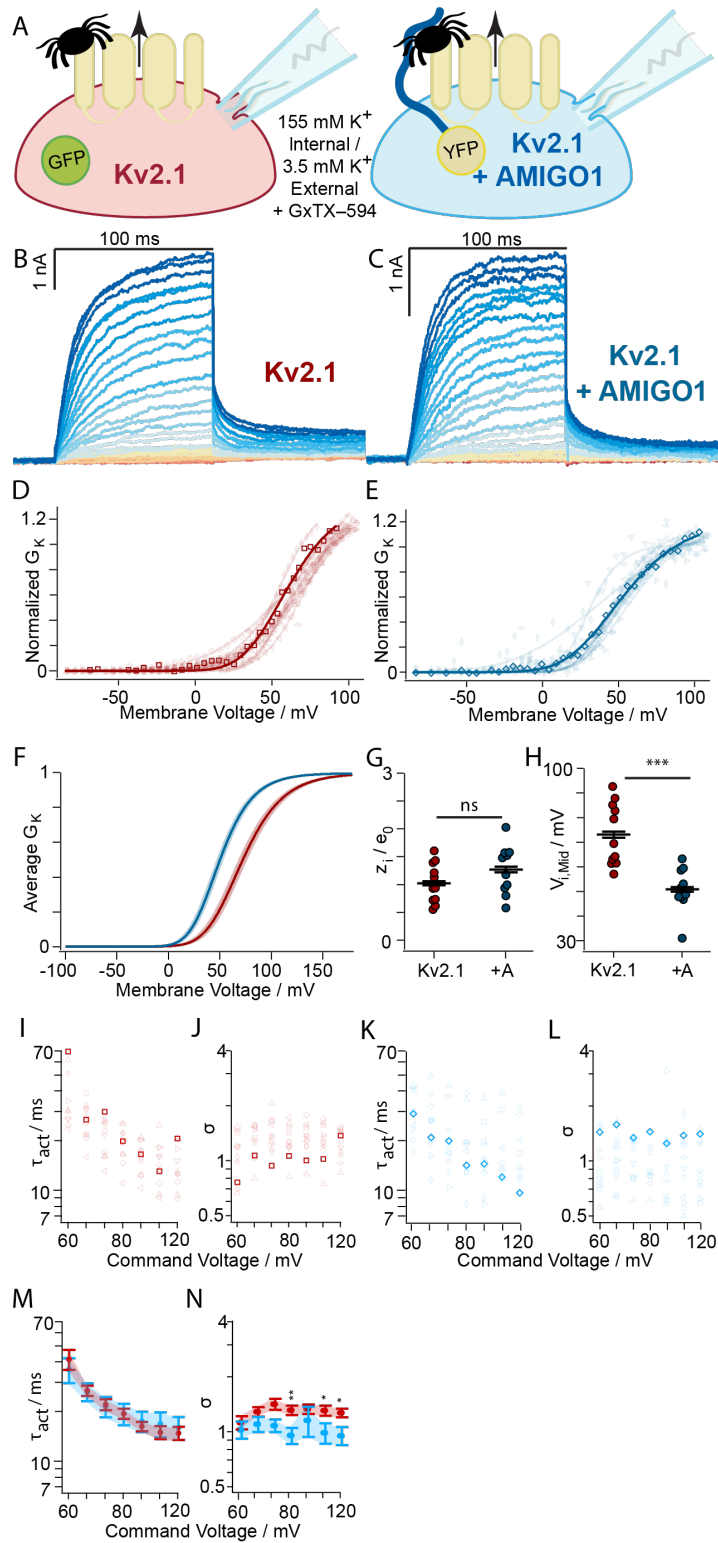

1004

1005 *Figure 6. The voltage sensor toxin, GxTX-594, enhances modulation by AMIGO1 on Kv2.1*  
1006 *conductance.*

1007 (A) Experimental set up: Kv2.1-CHO cells were transfected 48 hours prior to whole-cell recording with either GFP  
1008 (red) or AMIGO1-YFP (blue). Kv2.1 expression was induced by incubation with minocycline for 1-2 hours prior to  
1009 recording. After initial whole cell recordings (Fig. 4), cells treated with 100 nM GxTX-594 (tarantulas), for 5  
1010 minutes and then additional macroscopic  $K^+$  ionic currents were recorded (black arrow). (B, C) Representative  
1011 Kv2.1 current response elicited from a Kv2.1 control (6.0 pF) or Kv2.1 + AMIGO1 (14.5 pF) cell. Cells were given  
1012 100 ms voltage steps ranging from -80 mV (dark red trace) to +120 mV (dark blue trace) and then stepped to 0 mV  
1013 to record tail currents. The holding potential was -100 mV. (D, E respectively) Normalized  $G-V$  relationships for  
1014 Kv2.1 control or Kv2.1 + AMIGO1 cells. Different symbols correspond to individual cells and the bolded trace  
1015 corresponds to the  $G-V$  derived from the exemplar cell shown in panels B, C respectively. Solid lines represent 4<sup>th</sup>  
1016 order Boltzmann relationships (Eqn. C). (F) Reconstructed 4<sup>th</sup> order Boltzmann fits using the average  $V_{i, Mid}$  and the  
1017 average  $z_i$  (Table 1). Shaded areas represent  $V_{i, Mid} \pm SEM$ . (G) Steepness and (H) midpoint of 4<sup>th</sup> order Boltzmann  
1018 fits. Bars are mean  $\pm SEM$  (I, K respectively) Values of  $\tau_{act}$  from fitting of Eqn. F onto the activation phase of  
1019 Kv2.1 control ( $n = 11$ ) or Kv2.1 + AMIGO1 ( $n = 11$ ) currents. The bolded symbols correspond to the representative  
1020 current response shown in (B/D or C/E). (J, L respectively) Values of  $\sigma$  from fitting of Eqn. F onto the activation  
1021 phase of Kv2.1 control or Kv2.1 + AMIGO1 currents. The bolded symbols correspond to the representative current  
1022 response shown in (B/D or C/E). (M) Mean  $\tau_{act}$  and (N)  $\sigma$  in the presence of 100 nM GxTX-594, following each  
1023 command voltage step. Bars are mean  $\pm SEM$ . (Statistics G, H, M, N) Unpaired, two-tailed T-test p-values are in  
1024 Table 1. \*\*:  $p = \leq 0.01$ , \*:  $p = \leq 0.05$ , ns: not significant.

## 1025 AMIGO1 facilitates the activation of Kv2.1 voltage sensors

1026 To determine if AMIGO1 affects voltage sensor movement, we measured gating currents  
1027 ( $I_g$ ), which correspond to movement of Kv2.1 voltage sensors across the transmembrane electric  
1028 field. Kv2.1-CHO cells were patch clamped in whole-cell mode in the absence of  $K^+$  (Fig. 7A),  
1029 and given voltage steps to elicit gating currents (Fig. 7B, C). The resolvable ON gating currents  
1030 ( $I_{g,ON}$ ) represent an early component of gating charge movement, but not all of the total gating  
1031 charge; the later charge movements, which include any charge associated with the pore opening,  
1032 move too slowly for us to resolve accurately in ON measurements (Scholle et al., 2004; Tilley et  
1033 al., 2019). If AMIGO1 acts solely through the pore we would not expect to detect an impact on  
1034 this early component of ON gating currents.

1035 At voltages above 50 mV, the charge density translocated over the first 3.5 ms,  $Q_{ON,fast}$ ,  
1036 was not significantly different with AMIGO1 (Fig. 7D, E, F), indicating that AMIGO1 did not  
1037 alter the total charge translocated during early conformational transitions. However, between -10  
1038 mV and +50 mV, Kv2.1 control cells did not move as much gating charge as Kv2.1 + AMIGO1  
1039 cells, indicating a shift in the threshold for gating current activation (Fig. 7F). The shift in  
1040 voltage dependence was quantified by fitting the normalized  $Q_{ON,fast}-V$  with a single Boltzmann  
1041 fit (Fig. 7G, H, I) yielding  $\Delta V_{g,Mid,ON,fast}$  of  $-12.8 \pm 3.5$  mV (SEM) (Fig. 7K) and a  $\Delta z_{g,ON,fast}$  of  
1042  $0.215 \pm 0.058 e_0$  (SEM) (Fig. 7J) (Table 2). This result indicates that AMIGO1 modulates the  
1043 early gating charge movement which occurs before pore opening.

1044 To determine whether AMIGO1 modulates the kinetics of early gating charge movement,  
1045 we extracted a time constant ( $\tau_{ON}$ ) from the decay phase of  $I_{g,ON}$  that occurs before 10 ms (Fig.  
1046 7B top, C top) (Eqn. G) as in (Tilley et al., 2019). In Kv2.1 + AMIGO1 cells, the  $\tau_{ON}-V$  relation  
1047 shifts to more negative voltages compared to control (Fig. 7L, M, N). Above +30 mV, the mean  
1048  $\tau_{ON}$  for Kv2.1 + AMIGO1 cells was faster than the mean  $\tau_{ON}$  from Kv2.1 control cells (Fig. 7N).  
1049 Fitting the  $\tau_{ON}-V$  with rate theory equations indicated AMIGO1 accelerates the forward rate of  
1050 gating charge movement by 1.7x at neutral voltage and decreases the voltage dependence of this  
1051 rate by 13% (Fig. 7N). This result indicates that voltage sensors activate faster in the presence of  
1052 AMIGO1, consistent with destabilization of the earliest resting conformation of the the voltage  
1053 sensors by AMIGO1.

1054 To measure if AMIGO1 alters the total gating charge movement, we integrated OFF  
1055 gating currents ( $I_{g,OFF}$ ) at -140 mV after 100 ms voltage steps (Fig. 7B bottom, C bottom, O, P,  
1056 Q). The density of  $Q_{OFF}$  elicited by voltage steps above -10 mV was not significantly different  
1057 between Kv2.1 control and Kv2.1 + AMIGO1 cells (Fig. 7Q), indicating that AMIGO1 did not  
1058 alter the density of channels expressed, nor the total gating charge per channel. However,  
1059 between -25 mV and -10 mV, Kv2.1 control cells did not move as much gating charge as Kv2.1  
1060 + AMIGO1 cells, indicating a shift in voltage dependence (Fig. 7Q). Boltzmann fits (Fig. 7R, S,  
1061 T), yielded  $\Delta V_{g,Mid,OFF}$  of  $-10.8 \pm 2.4$  mV (SEM) (Fig. 7V) and a  $\Delta z_{g,OFF}$  of  $0.43 \pm 0.20 e_0$  (SEM)  
1062 (Fig. 7U) (Table 2), indicating that AMIGO1 shifts total gating charge movement to more  
1063 negative voltages. Overall, we find that AMIGO1 affects every aspect of gating current  
1064 movement. As both  $Q_{ON,fast}-V$  and  $\tau_{0mV,\alpha}$  measurements report the gating charge movements out  
1065 of the earliest resting conformation, these results indicate that AMIGO1 destabilizes the earliest  
1066 resting conformation relative to voltage sensor conformations later in the conduction activation  
1067 pathway of Kv2.1.

1068 Figure 7. AMIGO1 facilitates the activation of Kv2 voltage sensors.

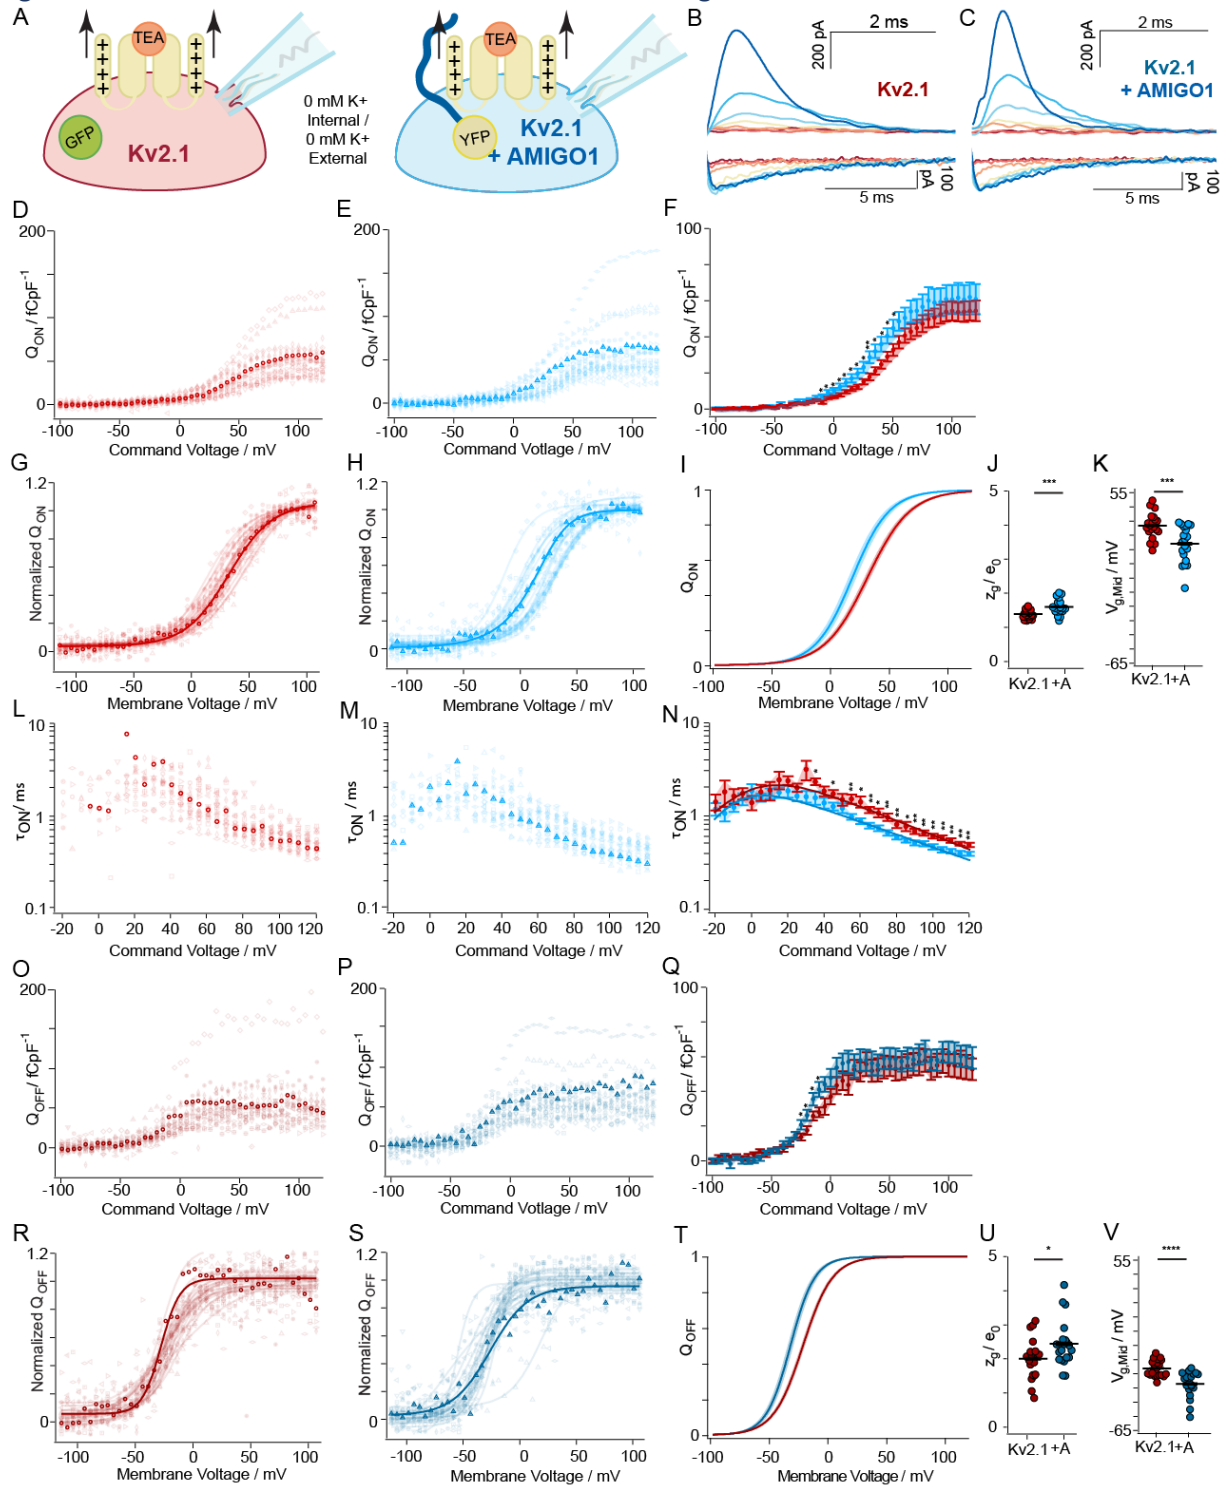

1069

1070 *Figure 7. AMIGO1 facilitates the activation of Kv2 voltage sensors.*  
1071 Experimental set up: Kv2.1-CHO cells were simultaneously induced for Kv2.1 expression and transfected with  
1072 either GFP (red) or AMIGO1-YFP (blue) 48 hours prior to whole-cell recording. Macroscopic  $K^+$  currents were  
1073 inhibited by the addition of the Kv2 pore-blocker, TEA (orange), and by removal of free  $K^+$  ions. Gating currents  
1074 (black arrows) were recorded. **(B, C)** Top/Bottom: Representative  $I_{g,ON}/I_{g,OFF}$  response elicited from a Kv2.1 control  
1075 (11.9 pF) or Kv2.1 + AMIGO1 (8.2 pF) cell. Cells were given 100 ms voltage steps ranging from -100 mV (dark red  
1076 trace) to +120 mV to record  $I_{g,ON}$  and then stepped to -140 mV to record  $I_{g,OFF}$ . The holding potential was -100 mV.  
1077 For presentation, only voltage pulses to -100, -50, -25, +0, +25, +50, and +100 mV are presented. **(D, E**  
1078 **respectively)**  $Q_{ON,fast}/pF$  for Kv2.1 control and Kv2.1 + AMIGO1 cells was calculated by normalizing the area  
1079 under the raw  $I_{g,ON}$  traces by cell size. Bolded circle data corresponds to exemplar cell shown in B, C. **(F)**  
1080  $Q_{ON,fast}/pF-V$  relation. Bars are mean  $\pm$  SEM. **(G, H respectively)** Normalized  $Q_{ON,fast}-V$  relation from D/E. The  
1081 bolded trace corresponds to the representative current response shown in D, E. Solid lines represent 1<sup>st</sup> order  
1082 Boltzmann relationship fit (Eqn. C). **(I)** Reconstructed Boltzmann fits using the average  $V_{g,Mid,ON,fast}$  and the average  
1083  $z_{g,ON,fast}$  (Table 2). Shaded areas represent  $V_{g,Mid,ON,fast} \pm$  SEM. **(J)** Steepness and **(K)** midpoint of 1<sup>st</sup> order Boltzmann  
1084 fits. Bars are mean  $\pm$  SEM. **(L, M respectively)** Values of  $\tau_{ON}$  from fitting of Eqn. G to the rising and falling phase  
1085 of the ON gating currents shown in B/C from Kv2.1 control cells ( $n = 20$ ) or Kv2.1 + AMIGO1 cells ( $n = 20$ ). **(N)**  
1086  $\tau_{ON}-V$ . Bars are mean  $\pm$  SEM. Solid lines represent Eqn. H fit. Fit values for Kv2.1 control cells:  $k_{0mV,\alpha} = 254 \pm 26$   
1087  $s^{-1}$ ,  $z_{\alpha} = 0.468 \pm 0.026 e_0$ ,  $k_{0mV,\beta} = 261 \pm 50 s^{-1}$ ,  $z_{\beta} = -1.31 \pm 0.37 e_0$ . Fit values for Kv2.1 + AMIGO1 cells:  $k_{0mV,\alpha} =$   
1088  $443 \pm 26 ms^{-1}$ ,  $z_{\alpha} = 0.405 \pm 0.019 e_0$ ,  $k_{0mV,\beta} = 157 \pm 52 ms^{-1}$ ,  $z_{\beta} = -2.00 \pm 0.55 e_0$ . Fit values are reported  $\pm$  SD. **(O, P**  
1089 **respectively)**  $Q_{OFF}/pF$  for Kv2.1 control and Kv2.1 + AMIGO1 cells was calculated by normalizing the area under  
1090 the raw  $I_{g,OFF}$  traces by cell size. Bolded circle data corresponds to exemplar cell shown in B, C. **(Q)**  $Q_{OFF}/pF-V$   
1091 relation. Bars are mean  $\pm$  SEM. **(R, S respectively)** Normalized  $Q_{OFF}-V$  relation from O/P. The bolded trace  
1092 corresponds to the representative current response shown in D/O, E/P. Solid lines represent 1<sup>st</sup> order Boltzmann  
1093 relationship fit (Eqn. C). **(T)** Reconstructed Boltzmann fits using the average  $V_{g,Mid,OFF,fast}$  and the average  $z_{g,OFF,fast}$   
1094 (Table 2). Shaded areas represent  $V_{g,Mid,OFF,fast} \pm$  SEM **(U)** Steepness and **(V)** midpoint of 1<sup>st</sup> order Boltzmann fits.  
1095 Bars are mean  $\pm$  SEM. **(Statistics and plotting)** Unpaired, two-tailed, T-test p-values are in Table 2. \*\*\*\*:  $p = \leq$   
1096 0.0001, \*\*\*:  $p = \leq 0.001$ , \*\*:  $p = \leq 0.01$ , \*:  $p = \leq 0.05$ , ns: not significant.

1097 Table 2. Boltzmann parameters and  $\Delta G$  calculations for voltage sensor movement.

| Kv2.1-CHO cells    | Activation ( $Q-V$ ) |                  |                   |     | $\Delta G_{AMIGO1}$ (kcal/mol) |                  |                      |
|--------------------|----------------------|------------------|-------------------|-----|--------------------------------|------------------|----------------------|
|                    | $Q_{ON,fast}$        | $V_{g,Mid}$ (mV) | $z_g$ ( $e_0$ )   | $n$ | Eqn. E                         |                  |                      |
| rKv2.1 + GFP       | $30.6 \pm 2.0^S$     |                  | $1.38 \pm 0.03^U$ | 20  | -1.92                          |                  |                      |
| rKv2.1+ AMIGO1-YFP | $17.8 \pm 2.9^T$     |                  | $1.61 \pm 0.05^V$ | 20  |                                |                  |                      |
| $Q_{OFF}$          | $V_{g,Mid}$ (mV)     | $V_{g,Med}$ (mV) | $z_g$ ( $e_0$ )   | $n$ | Eqn. E                         | Eqn. J*          | Eqn. J* <sup>o</sup> |
| rKv2.1 + GFP       | $-22.0 \pm 1.3^W$    | -19.5            | $2.00 \pm 0.13^Y$ | 20  | -2.45                          | $-3.11 \pm 0.69$ | -2.74                |
| rKv2.1+ AMIGO1-YFP | $-32.8 \pm 2.0^X$    | -29.0            | $2.43 \pm 0.15^Z$ | 20  |                                |                  |                      |

1098 *Table 2. Boltzmann parameters and  $\Delta G$  calculations for voltage sensor movement.*

1099 Average  $V_{g,Mid}$  and  $z_g$  values were derived from 1<sup>st</sup> order Boltzmann fits of  $n$  individual cells. All values are given  $\pm$   
 1100 SEM.  $V_{g,Mid}$ , is calculated under the assumption that all voltage sensors activate in a two-state process and represents  
 1101 the voltage at which half of the total voltage sensors are fully activated.  $V_{g,Med}$ , represents the voltage at which half  
 1102 of the total voltage sensors are fully activated, but makes no assumptions about the number of conformational  
 1103 change that underly the process of voltage sensor activation. Corresponding p-values for comparisons are as  
 1104 follows:  $Q_{ON,fast}$ : ST: 0.00093. UV: 0.00084. OFF Gating currents: WX:  $7.82 \times 10^{-5}$ . YZ: 0.038.  $V_{g,Med}$  was derived  
 1105 from median analysis fitting of the average  $Q-V$  relation.  $\Delta G$  was tabulated using Eqn. E or Eqn. J as listed. \* = the  
 1106 theoretical minimum amount of charge movement,  $12.5 e_0$ , required for channel activation was used in these  
 1107 calculations. <sup>o</sup> =  $V_{g,Med}$  was used in this calculation.  
 1108

1109 AMIGO1 accelerates voltage-stimulated GxTX-594 dissociation

1110 To further test the hypothesis that AMIGO1 specifically destabilizes the earliest resting  
1111 conformation of Kv2.1 voltage sensors, we probed the stability of this conformation with GxTX-  
1112 594. The earliest resting conformation is stabilized by GxTX (Tilley et al., 2019) and when  
1113 occupancy of this conformation is decreased by voltage activation, the rate of GxTX-594  
1114 dissociation accelerates (Thapa et al., 2021). Destabilization of the earliest resting conformation  
1115 by AMIGO1 is expected to increase the rate of GxTX-594 dissociation when voltage sensors are  
1116 partially activated. To test this prediction, we measured the rate of GxTX-594 dissociation at  
1117 +30 mV, a potential at which about 20% of gating charge is activated with GxTX bound (Tilley  
1118 et al., 2019) (Fig. 8A, B, C, D). The rate of GxTX-594 dissociation from Kv2.1 ( $k_{\Delta F}$ ) accelerated  
1119 from  $0.073 \pm 0.010 \text{ s}^{-1}$  (SEM) in control cells to  $0.115 \pm 0.015 \text{ s}^{-1}$  (SEM) in cells positive for  
1120 AMIGO1-YFP fluorescence (Fig. 8E, F). As we see no evidence that AMIGO1 alters GxTX-  
1121 594 affinity or binding in cells at rest (Supplemental Fig. 3, Fig. 9), this 1.6-fold acceleration of  
1122  $k_{\Delta F}$  is consistent with AMIGO1 destabilizing the earliest resting conformation of voltage sensors.  
1123 The thermodynamic model developed to interpret the  $k_{\Delta F}$  of GxTX-594 dissociation (Thapa et  
1124 al., 2021) estimates that AMIGO1 decreases the stability of the earliest resting conformation of  
1125 each voltage sensor by 1.9-fold or a  $\Delta G_{\text{AMIGO1}}$  of -1.5 kcal/mol for Kv2.1 tetramers (Eqn. L).  
1126 This result suggests that AMIGO1 destabilizes the resting voltage sensor conformation to speed  
1127 up voltage sensor activation and shift conductance to lower voltages.



1128 Figure 8. AMIGO1 accelerates voltage-stimulated GxTX-594 dissociation.

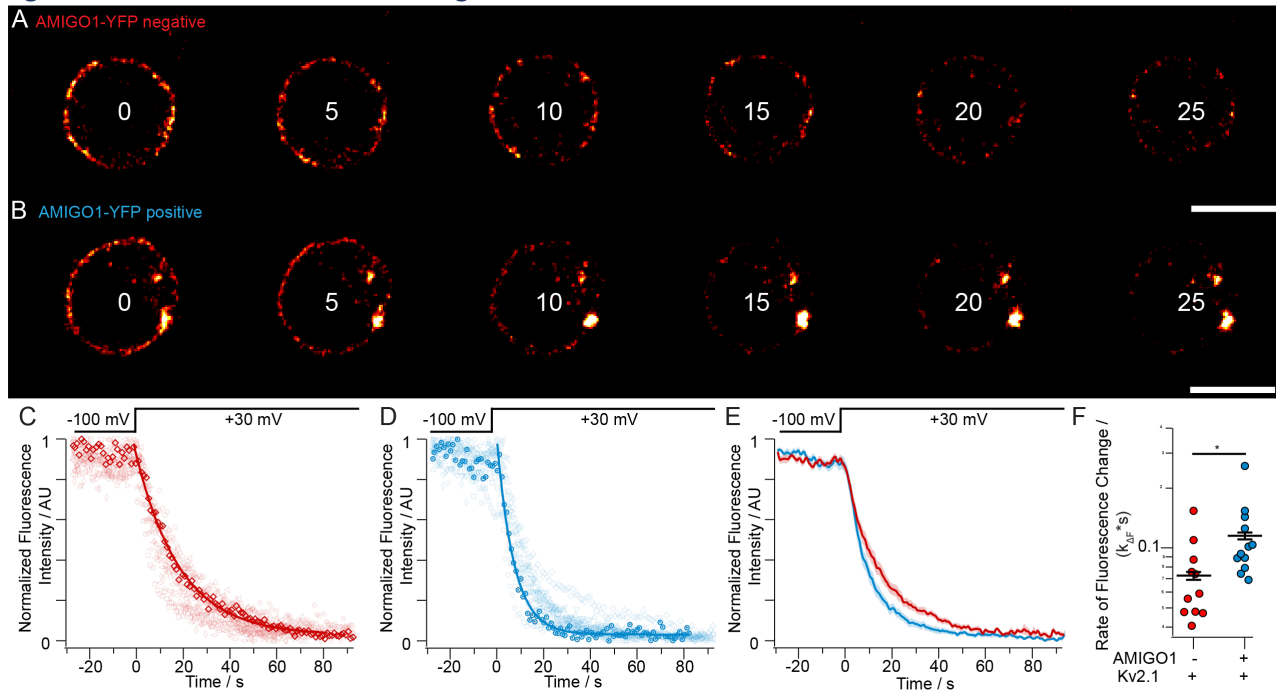

1129

1130 *Figure 8. AMIGO1 accelerates voltage-stimulated GxTX-594 dissociation.*

1131 (A, B) Airyscan images of the solution-exposed membrane of Kv2.1-CHO cells concurrently transfected with  
1132 AMIGO1-YFP and induced for 48 hours prior to GxTX-594 treatment and imaging. Cells were held -100 mV for  
1133 30 seconds before being stimulated to +30 mV (Time = 0 s) to trigger GxTX-594 dissociation. (A and B) showcase  
1134 fluorescence intensities of two exemplar cells for the first 25 seconds following voltage stimuli. The time point of  
1135 each image is listed. The scale bar represents 10  $\mu\text{m}$ . (C, D) Normalized fluorescence intensity decay plots for  
1136 Kv2.1-CHO cells without (C) AMIGO1-YFP fluorescence ( $n = 11$ ) and with (D) AMIGO1-YFP fluorescence ( $n =$   
1137 11). The bolded traces correspond to exemplar cells in (A) and (B). The solid line represents the monoexponential fit  
1138 of fluorescence decay and was used to derive the  $\tau$ . (E) Averaged fluorescence intensity decay for AMIGO1-YFP  
1139 negative (red), and AMIGO1-YFP positive (blue) cells. Standard error is displayed. (F) Rates of fluorescence  
1140 change ( $k_{AF}$ ) were calculated as  $1/\tau$ . (Statistics) The unpaired, two-tailed, T-test p-value comparing Kv2.1 control  
1141 cells and Kv2.1 + AMIGO1 cells was  $p = 0.03$ . \*:  $p = \leq 0.05$ .

## 1142 Evidence against an extracellular surface potential mechanism of AMIGO1

1143 We next aimed to differentiate between mechanisms through which AMIGO1 could  
1144 change voltage sensor action. The destabilization of the early resting conformation could be  
1145 allosteric or from a change in the electrostatic environment surrounding Kv2.1's gating charges.  
1146 Per surface charge theory, local extracellular negative charges could attract positive gating  
1147 charges to activate channels (Chandler et al., 1965; Gilly & Armstrong, 1982; Hille, 2001; Park  
1148 et al., 2003). AMIGO1 possesses five extracellular glycosylation sites (Kajander et al., 2011),  
1149 each potentially decorated with negatively-charged sugar moieties (Bishop et al., 2018).  
1150 AMIGO1 also has a conserved negatively charged residue predicted to localize near the  
1151 extracellular side of the membrane (Kajander et al., 2011; Kuja-Panula et al., 2003). Similar  
1152 structural characteristics are found in the Nav  $\beta$ 1 auxiliary subunit which, like AMIGO1, is a  
1153 glycosylated, single transmembrane pass protein with an immunoglobulin-domain. Nav  $\beta$ 1 has  
1154 been proposed to interact with Nav1.4  $\alpha$  subunit through surface charge effects (Ednie &  
1155 Bennett, 2012; Ferrera & Moran, 2006; D. Johnson et al., 2004). We tested if AMIGO1 likewise  
1156 affects Kv2.1 activation through electrostatic surface charge interactions.

1157 To measure the electrostatics of the environment immediately surrounding the Kv2.1  
1158 voltage sensor domain complex with and without AMIGO1, we employed far-red polarity-  
1159 sensitive fluorescence (Cohen et al., 2005). The polarity-sensitive fluorophore, JP, was localized  
1160 to the Kv2.1 voltage sensor by conjugating GxTX to JP at either residue Ser13 or Lys27  
1161 (Fletcher-Taylor et al., 2020). When GxTX binds to the S3-S4 extracellular region of the Kv2.1  
1162 channel (Gupta et al., 2015), Ser13 and Lys27 occupy positions of distinct polarity. At resting  
1163 membrane potentials, GxTX Ser13Pra(JP) has an emission maximum of 644 nm, consistent with  
1164 the homology-based prediction that Ser13 of GxTX localizes in an aqueous environment  
1165 branched away from S4. Conversely, GxTX Lys27Pra(JP) has an emission maximum of 617 nm,  
1166 consistent with the prediction that Lys27 sits in the polar region of the membrane adjacent to S4  
1167 (Fletcher-Taylor et al., 2020). If AMIGO1 were to alter the resting conformation of the Kv2.1  
1168 voltage sensor domain, we would expect either of these environmental point detectors, GxTX  
1169 Ser13Pra(JP) or GxTX Lys27Pra(JP), to exhibit an altered emission maximum.

1170 Full emission spectra of JP fluorescence from Kv2.1-CHO cells transfected with  
1171 AMIGO1-YFP and treated with GxTX Ser13Pra(JP) or GxTX Lys27Pra(JP) were fitted with 2-  
1172 component split pseudo-Voigt functions (Fig. 9C, F). Fitting shows emission peaks, 644 nm and  
1173 617 nm, respectively, are unchanged with or without AMIGO1-YFP, consistent with the local  
1174 electrostatic environment surrounding the JP probes positioned on resting Kv2.1 voltage sensors  
1175 not being altered by AMIGO1 expression. Previous work has shown that GxTX Lys27Pra(JP)  
1176 emission peak wavelength is sensitive to conformational changes among early resting states of  
1177 voltage sensors (Fletcher-Taylor et al., 2020). The absence of any AMIGO1-induced change in  
1178 environment for either of these GxTX sidechains suggests that AMIGO1 does not cause  
1179 significant changes to the local environment of the GxTX binding site on the S3b segment of  
1180 Kv2.1, nor the GxTX position in the membrane when bound to the channel. These results  
1181 indicate that any destabilization of the GxTX binding site by AMIGO1 is indirect, as the binding  
1182 site itself appears to retain the same conformation and local environment in the presence of  
1183 AMIGO1.

1184 Figure 9. AMIGO1 does not alter the Kv2-1-GxTX interface on resting voltage sensors.

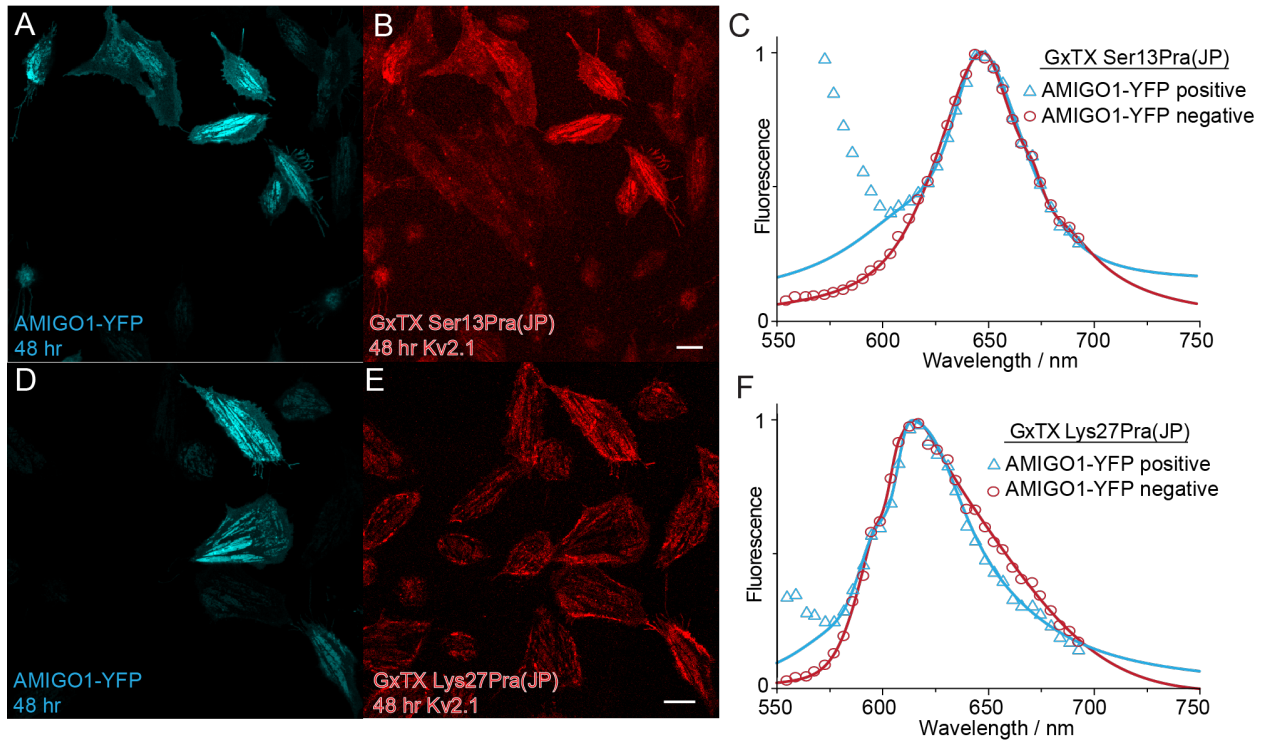

1185  
1186 *Figure 9. AMIGO1 does not alter the Kv2-1-GxTX interface on resting voltage sensors.*  
1187 (A,D) Confocal image of AMIGO1-YFP fluorescence (blue) in Kv2.1-CHO cells concurrently transfected with  
1188 AMIGO1-YFP and induced for Kv2.1 expression. (B,E) Cells were treated with GxTX Ser13Pra(JP) (B) or GxTX  
1189 Lys27Pra(JP) (E) for five minutes before lambda imaging with 543 nm excitation. (C,F) Fitted emission spectra of  
1190 GxTX Ser13Pra(JP) (B) and GxTX Lys27Pra(JP) (E) from Kv2.1-CHO cells positive (blue) and negative (red) for  
1191 AMIGO1-YFP fluorescence. Data points for all spectra are the mean of normalized emission from 72 and 69 cells  
1192 respectively. All spectra were fit with two-component split pseudo-Voigt functions with shape parameters and root-  
1193 mean-squared values found in Supplemental Table 1. Fittings for spectra without AMIGO1-YFP included all data  
1194 points as shown. Fittings for spectra with AMIGO1-YFP included emission data points starting at 613 nm and  
1195 greater for GxTX Ser13Pra(JP) (B) and 582 nm and greater for GxTX Lys27Pra(JP) (E).

1196 We also tested the whether AMIGO1 acts by a surface charge mechanism by a classical  
1197 charge screening approach. Surface charge interactions can be revealed by increasing the  
1198 concentration of  $Mg^{2+}$  to screen, or minimize, the impact of fixed negative charges near the  
1199 voltage sensors (Elinder & Århem, 2003; Green & Andersen, 1991; Hille, 2001). If

1200 AMIGO1 alters surface potential, we would expect elevated  $Mg^{2+}$  to shrink  $\Delta V_{i, Mid}$ .

1201 To determine whether surface charge screening suppresses the AMIGO1 effect, voltage  
1202 clamp experiments were conducted as in Fig. 4, except external recording solutions contained  
1203 100 mM  $Mg^{2+}$  (Fig. 10A, B, C). Kv2.1 requires more positive voltage steps to activate in high  
1204  $Mg^{2+}$  solutions (Table 2) (Broomand et al., 2007). AMIGO1 effected a  $\Delta V_{i, Mid}$  of  $-7.42 \pm 2.41$   
1205 mV (SEM) (Fig. 10H) but did not change  $z_i$  (Fig. 10G) (Table 1) . When compared to low  $Mg^{2+}$   
1206 conditions by Ordinary 2-way ANOVA,  $\Delta V_{i, Mid}$  was not significantly different in normal versus  
1207 100 mM  $Mg^{2+}$  (interaction of  $p = 0.33$ ). This result is inconsistent with AMIGO1 altering Kv2.1  
1208 activation by a surface charge mechanism and when combined with results from the  
1209 environmentally sensitive imaging experiments, we find no evidence that AMIGO1's influence  
1210 on Kv2.1 is mediated by extracellular electrostatic effects.

1211 Figure 10. Surface charge screening does not suppress the AMIGO1 effect.

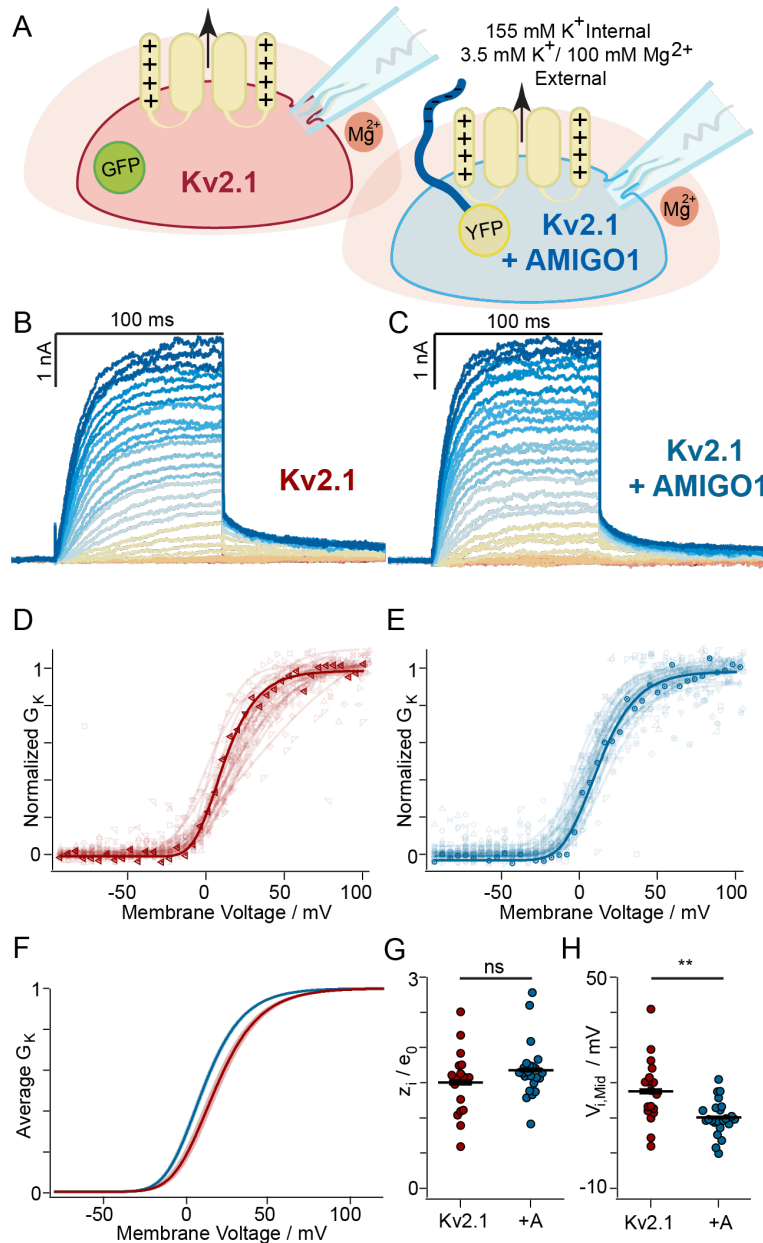

1212

1213 *Figure 10. Surface charge screening does not suppress the AMIGO1 effect.*

1214 (A) Experimental set up: Kv2.1-CHO cells were transfected 48 hours prior to whole-cell recording with either GFP  
 1215 (red) or AMIGO1-YFP (blue). Kv2.1 expression was induced by incubation with minocycline for 1-2 hours prior to  
 1216 recording. Macroscopic K<sup>+</sup> ionic current was recorded (black arrow). 100 mM magnesium was used to shield  
 1217 surface charges (peach halo). (B, C) Representative Kv2.1 current response elicited from a Kv2.1 control (10.0 pF)  
 1218 or Kv2.1 + AMIGO1 (6.3 pF) cell. Cells were given 100 ms voltage steps ranging from -80 mV (dark red trace) to  
 1219 +120 mV (dark blue trace) and then stepped to 0 mV to record tail currents. The holding potential was -100 mV. (D,  
 1220 E respectively) Normalized  $G-V$  relationships for Kv2.1 control or Kv2.1 + AMIGO1 cells. Different symbols  
 1221 correspond to individual cells and the bolded trace corresponds to the  $G-V$  derived from the exemplar cell shown in  
 1222 panels B, C respectively. Solid lines represent 4<sup>th</sup> order Boltzmann relationships (Eqn. C). (F) Reconstructed 4<sup>th</sup>  
 1223 order Boltzmann fits using the average  $V_{i, Mid}$  and the average  $z_i$  (Table 1). Shaded areas represent  $V_{i, Mid} \pm SEM$ . (G)  
 1224 Steepness and (H) midpoint of 4<sup>th</sup> order Boltzmann fits. Bars are mean  $\pm$  SEM. Unpaired, two-tailed T-tests p-  
 1225 values are in Table 1. \*\*:  $p \leq 0.01$ , ns: not significant.

## 1226 Discussion

1227 We asked whether AMIGO1 modulates the threshold for activation of Kv2.1 conductance by  
1228 way of modulating conformational changes associated with either pore opening or voltage sensor  
1229 activation. We found that AMIGO1 destabilizes the resting, inward conformation of Kv2.1  
1230 voltage sensors, causing channels to activate at more negative voltages. This conclusion is  
1231 supported by three major results:  
1232

1233 *1) AMIGO1 destabilizes the earliest resting conformation of Kv2.1 voltage sensors.*

1234 Activation kinetics measurements from macroscopic currents revealed that AMIGO1 expression  
1235 accelerated activation but only at the subset of voltages influenced by voltage sensor dynamics  
1236 and not those limited by a slow pore opening step (Fig. 4). When voltage sensor movements  
1237 were measured directly, gating current recordings revealed an increase in the forward rate  
1238 constant of gating charge activation in cells with AMIGO1. Between 0 and 120 mV, pore  
1239 opening is 10-30x slower than  $I_{g,ON}$  decay (Fig. 4, 7), too slow to influence voltage sensor  
1240 movement captured by these measurements.  $Q_{ON,fast}$  is shifted to more negative voltages with  
1241 AMIGO1, indicating that the earliest resting conformation is destabilized relative to more  
1242 activated conformations. When estimates of the amount of energy AMIGO1 contributes to  
1243 modulating Kv2.1 conformational bias were compared, we found that  $\Delta G_{AMIGO1}$  was more  
1244 extreme when calculated for voltage sensor movements (Table 2) as opposed to conductance  
1245 changes (Table 1). When the entirety of the Kv2.1 charge movement was considered, as  
1246 measured in the  $Q_{OFF}-V$  relation,  $\Delta G_{AMIGO1}$  was  $\sim 3$  kcal/mol. This value was consistent when  
1247 calculated using three distinct methods, Eqn. E, Eqn. J\*, and Eqn J\*<sup>o</sup>. We also calculated that  
1248 AMIGO1 imparted -1.3 kcal/mol (Eqn. I) to  $\Delta G_{AMIGO1}^{\ddagger}$ , which describes the rate of  
1249 conformational change between the resting and transitional state. We captured this measurement  
1250 from the change in the forward rate  $\tau_{0mV,\alpha}$  measured from ON gating current decays (Fig. 7).  
1251 From these results we can conclude that AMIGO1 destabilizes the fully resting conformation of  
1252 Kv2.1 channels by  $\sim 3$  kcal/mol, relative to the fully active open state, and that about half of this  
1253 energy lowers the barrier for the initial exit of voltage sensors from their resting conformation  
1254 (Fig. 11).  
1255

1256 *2) AMIGO1 opposes the action of a toxin which stabilizes resting voltage sensors*

1257 GxTX and its GxTX-594 analog detain Kv2.1 voltage sensors in their earliest resting  
1258 conformation (Tilley et al., 2019; Thapa et al., 2021). In the presence of GxTX-594, the  
1259 AMIGO1  $G-V$  shift widens to  $-22.3 \pm 4.8$  (SEM) from  $-5.74 \pm 2.15$  mV (SEM) without GxTX-  
1260 594 (Fig. 4, 6) and  $\Delta G_{AMIGO1}$  is increased (Table 1), consistent with AMIGO1 liberating voltage  
1261 sensors from detention in their earliest resting conformation. The enhancement of GxTX-594  
1262 dissociation at +30 mV by AMIGO1 is consistent with enhancement of voltage sensor activation  
1263 by AMIGO1 (Fig. 8). All GxTX-594 evidence supports the hypothesis that AMIGO1  
1264 destabilizes the earliest resting conformation of voltage sensors, allosterically opposing the  
1265 detention of voltage sensors at rest by GxTX-594.  
1266

1267 *3) AMIGO1 has a greater impact on the voltage sensors than the pore opening.*

1268 Free energy estimates indicate more AMIGO1 perturbation of the  $Q-V$  measurements than the  
1269  $G-V$ . The  $\Delta G$  for AMIGO1's impact on voltage sensor activation ranged from -1.92 kcal/mol to  
1270 -3.11 kcal/mol depending on the calculation method (Table 2). Yet, the  $\Delta G_{AMIGO1}$  calculated for

1271 ionic conductance was only -0.21 to -0.37 kcal/mol (Table 1). This lesser impact on pore opening  
1272 is consistent with a direct impact of AMIGO1 on voltage sensor movements which are coupled  
1273 to pore opening. When we looked at pore opening directly, we saw no evidence suggesting a  
1274 direct effect of AMIGO1. We saw no change in the slope of the  $G-V$  relationship with AMIGO1  
1275 (Fig. 1, 4, 6, 10), nor sigmoidicity (Fig. 4), nor single channel measurements (Fig. 5). While such  
1276 negative results cannot eliminate the possibility that AMIGO1 has a small direct effect on pore  
1277 opening, these negative results constrain the effect size of AMIGO1 on pore opening equilibria  
1278 or voltage sensor-pore coupling to be smaller than the error associated with our measurements.

1279 Figure 11. AMIGO1 destabilizes the resting conformation of Kv2.1 voltage sensors.

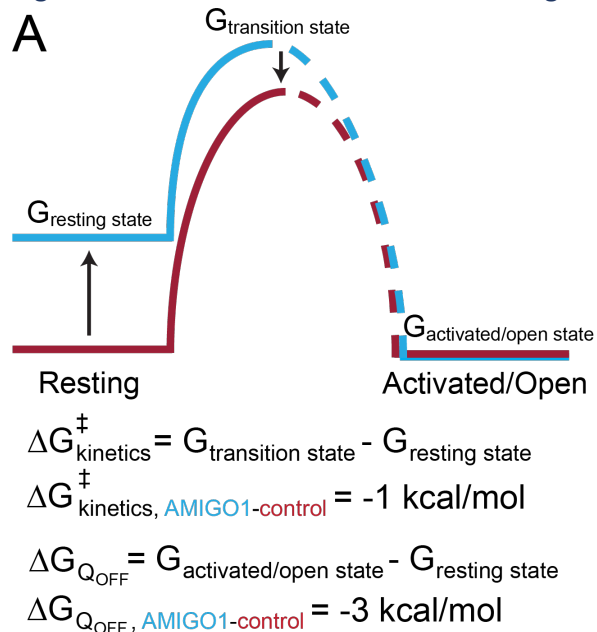

1280

1281 *Figure 11. AMIGO1 destabilizes the resting conformation of Kv2.1 voltage sensors.*

1282 AMIGO1 destabilizes the resting state conformation of Kv2.1 voltage sensors. AMIGO1 also lowers the activation

1283 energy barrier needed for Kv2.1 activation.



## 1284 Limitations

1285 More detailed investigation of the AMIGO1 impact on the Kv2.1 activation pathway was  
1286 limited by the relatively small magnitude of AMIGO1-dependent effects versus the cell-to-cell  
1287 variability, with  $\Delta V_{i, \text{Mid}}$  of 5 to 7 mV, and standard deviations for  $V_{i, \text{Mid}}$  of 4 to 9 mV (Table 1,  
1288 excluding GxTX-594). This degree of cell-to-cell variability does not appear to be unique to our  
1289 laboratory. Midpoints reported for rat Kv2.1 activation in HEK293 cells span a 36 mV range,  
1290 from -20.2 mV to 16.4 mV (Aréchiga-Figueroa et al., 2015, 2017; David et al., 2015; Delgado-  
1291 Ramírez et al., 2018; Kirmiz et al., 2018a; Li et al., 2015; Liu et al., 2016; Liu et al., 2017;  
1292 Maverick et al., 2021; Milescu et al., 2009; O'Connell et al., 2010; Park et al., 2006; Peltola et  
1293 al., 2011). When we calculated  $V_{\text{Mid}}$  standard deviation values from the standard errors and n-  
1294 values in these studies, standard deviations ranged from 1 to 17 mV, a range consistent with our  
1295 standard deviations. We suspect these notable  $V_{\text{Mid}}$  deviations result from the many different  
1296 types of regulation to which Kv2.1 channels are susceptible (MacDonald et al., 2003; Murakoshi  
1297 et al., 1997; Plant et al., 2011; Ramu et al., 2006). Means to constrain the cell-to-cell variability  
1298 in Kv2.1 function could allow more precise mechanistic studies of AMIGO1 modulation.

1299 Inconsistent action by auxiliary subunit(s) on a pore forming subunit counterpart is also a  
1300 common problem, requiring controls to assess interaction (Jain et al., 2001; Laedermann et al.,  
1301 2013; Meadows & Isom, 2005; Moran et al., 2000, 2003; Ponce et al., 2018). Variability in  
1302 channel-auxiliary subunit complexes can be due to inconsistent assembly. While some channel-  
1303 auxiliary subunit complexes coassemble after translocation to the plasma membrane (Froehner et  
1304 al., 1990), others must coassemble at earlier stages (Eichel et al., 2019; Nagaya & Papazian,  
1305 1997; Schmidt & Catterall, 1986; Yan & Aldrich, 2012). Further, abrogated or uncoupled  
1306 channel-auxiliary subunit trafficking can alter the glycosylation state of the auxiliary subunit and  
1307 further alter ion channel activity from conditions where trafficking is coupled (Bishop et al.,  
1308 2018; Vagin et al., 2009). As auxiliary subunits can have dose-dependent effects (Gonzalez-  
1309 Perez et al., 2014, 2018; Trapani & Korn, 2003; Wang et al., 2002), the method for coassembly  
1310 could contribute to variations in biochemical modification and auxiliary subunit function. While  
1311 our colocalization and reorganization assays offer evidence of AMIGO1 and Kv2.1 coassembly,  
1312 our approach may not have achieved homogenous coassembly or a uniform state of biochemical  
1313 modification. We have not eliminated the possibility that apparent excesses of AMIGO1 proteins  
1314 are unable to assemble with Kv2.1. If AMIGO1 coassembly is heterogenous, one might expect  
1315 increased cell-to-cell variability with AMIGO1. However, in CHO cells, the cell-to-cell  
1316 variability and slopes of Boltzmann fits are similar between AMIGO1 and control cells.  
1317 Although the most parsimonious explanation for the effect AMIGO1 has on the Kv2.1  
1318 conduction-voltage relation is a direct interaction with Kv2.1 voltage sensors, we have not  
1319 eliminated the possibility that unassociated AMIGO1 proteins could change cellular regulation  
1320 of Kv2.1. It is possible that AMIGO1 could destabilize resting voltage sensors not by physically  
1321 interacting with them, but through a mechanism involving intermediary molecules. Even if  
1322 AMIGO1 acts by an indirect mechanism, our mechanistic conclusions remain valid, as they are  
1323 not predicated on a direct protein-protein interaction between AMIGO1 and Kv2.1.

## 1324 Conclusions

1325 In order to shift the threshold for the activation of Kv2.1 conductance to lower voltages,  
1326 AMIGO1 destabilizes the earliest resting conformations of Kv2.1 voltage sensors relative to  
1327 more activated conformations. While we cannot completely rule out a direct influence on pore  
1328 dynamics, we saw no indication of such. Thus, we propose that AMIGO1 shifts the voltage-

1329 dependence of Kv2.1 conduction to more negative voltages by modulating early voltage sensor  
1330 movements.

1331       The impact of AMIGO1 on Kv2.1 voltage sensors suggests that all voltage-dependent  
1332 functions are modulated by AMIGO1. In addition to electrical signaling, Kv2 proteins have  
1333 important nonconducting functions (Bishop et al., 2018; Fox et al., 2013; Johnson et al., 2018;  
1334 Kirmiz et al., 2018a; Kirmiz et al., 2018b; Vierra et al., 2019). As AMIGO1 is colocalized with  
1335 all Kv2 proteins in many, if not all, mammalian brain neurons (Bishop et al., 2018; Mandikian et  
1336 al., 2014; Peltola et al., 2011), our results suggest that AMIGO1 acts as a functional unit of the  
1337 Kv2.1 voltage sensing domain and causes all voltage-dependent functions of Kv2-containing  
1338 proteins to occur at more negative potentials in many neurons throughout the brain.

1339

## 1340 Acknowledgements

1341 We thank Vladimir Yarov-Yarovoy, James Trimmer, Karen Zito, and Tsung-Yu Chen of  
1342 University of California Davis for constructive feedback integral to design and synthesis of  
1343 experimental ideas. The authors would like to thank the UC Davis statisticians Dr. Sandra Taylor  
1344 and Dr. Susan Stewart and as well as Karl Brown for their consultation on statistical approaches.

1345 This research was funded by National Institutes of Health grants R01NS096317 (JTS),  
1346 R21EY026449 (JTS), T32GM007377 (RJS), and F31NS108614 (RJS). The GxTX-Ser13Cys  
1347 peptide was synthesized at the Molecular Foundry of the Lawrence Berkeley National  
1348 Laboratory under U.S. Department of Energy contract DE-AC02-05CH11231. The authors  
1349 declare no competing financial interests.

1350

## 1351 Author Contributions

1352 Rebecka J. Sepela

1353 Conceptualization, Data curation, Formal analysis, Funding acquisition, Investigation,  
1354 Methodology, Project administration, Visualization, Writing – original draft, Writing – review  
1355 and editing

1356

1357 Robert G. Stewart

1358 Formal analysis, Investigation, Visualization

1359

1360 Luis A. Valencia

1361 Formal analysis, Visualization

1362

1363 Parashar Thapa

1364 Resources

1365

1366 Zeming Wang

1367 Resources

1368

1369 Bruce E. Cohen

1370 Conceptualization, Project administration, Writing – review and editing

1371

1372 Jon T. Sack

1373 Conceptualization, Data curation, Funding acquisition, Methodology, Project administration,  
1374 Supervision, Writing – original draft, Writing – review and editing

## 1375 Competing Interests

1376 We declare no competing interests.

## 1377 References

- 1378
- 1379 Aras, M. A., Saadi, R. A., & Aizenman, E. 2009. Zn<sup>2+</sup> regulates Kv2.1 voltage-dependent gating  
1380 and localization following ischemia. *Eur J Neurosci*, **30**(12): 2250–2257.  
1381 <https://doi.org/10.1111/j.1460-9568.2009.07026.x>
- 1382 Aréchiga-Figueroa, I. A., Delgado-Ramírez, M., Morán-Zendejas, R., & Rodríguez-Menchaca,  
1383 A. A. 2015. Modulation of Kv2.1 channels inactivation by curcumin. *Pharmacol Rep*,  
1384 **67**(6): 1273–1279. <https://doi.org/10.1016/j.pharep.2015.05.019>
- 1385 Aréchiga-Figueroa, I. A., Morán-Zendejas, R., Delgado-Ramírez, M., & Rodríguez-Menchaca,  
1386 A. A. 2017. Phytochemicals genistein and capsaicin modulate Kv2.1 channel gating.  
1387 *Pharmacol Rep*, **69**(6): 1145–1153. <https://doi.org/10.1016/j.pharep.2017.05.018>
- 1388 Armstrong, C. M., & Bezanilla, F. 1974. Charge movement associated with the opening and  
1389 closing of the activation-gates of the Na channels. *J Gen Physiol*, **63**: 533–552.  
1390 <https://doi.org/10.1085/jgp.63.5.533>
- 1391 Bar, C., Kuchenbuch, M., Barcia, G., Schneider, A., Jennesson, M., Le Guyader, G., Lesca, G.,  
1392 Mignot, C., Montomoli, M., Parrini, E., Isnard, H., Rolland, A., Keren, B., Afenjar, A.,  
1393 Dorison, N., Sadleir, L. G., Breuillard, D., Levy, R., Rio, M., ... Nabbout, R. 2020.  
1394 Developmental and epilepsy spectrum of KCNB1 encephalopathy with long-term outcome.  
1395 *Epilepsia*, **61**(11): 2461–2473. <https://doi.org/https://doi.org/10.1111/epi.16679>
- 1396 Barro-Soria, R., Perez, M. E., & Larsson, H. P. 2015. KCNE3 acts by promoting voltage sensor  
1397 activation in KCNQ1. *Proc Natl Acad Sci U S A*, **112**(52): E7286–E7292.  
1398 <https://doi.org/10.1073/pnas.1516238112>
- 1399 Barro-Soria, R., Ramentol, R., Liin, S. I., Perez, M. E., Kass, R. S., & Larsson, H. P. 2017.  
1400 KCNE1 and KCNE3 modulate KCNQ1 channels by affecting different gating transitions.  
1401 *Proc Natl Acad Sci U S A*, **114**(35): E7367–E7376.  
1402 <https://doi.org/10.1073/pnas.1710335114>
- 1403 Barro-Soria, R., Rebolledo, S., Liin, S. I., Perez, M. E., Sampson, K. J., Kass, R. S., & Larsson,  
1404 H. P. 2014. KCNE1 divides the voltage sensor movement in KCNQ1/KCNE1 channels into  
1405 two steps. *Nat Commun*, **5**(3750): 1-12. <https://doi.org/10.1038/ncomms4750>
- 1406 Baver, S. B., & O’Connell, K. M. S. 2012. The C-terminus of neuronal Kv2.1 channels is  
1407 required for channel localization and targeting but not for NMDA-receptor-mediated  
1408 regulation of channel function. *Neuroscience*, **217**: 56–66.  
1409 <https://doi.org/10.1016/j.neuroscience.2012.04.054>
- 1410 Bezanilla, F., Perozo, E., & Stefani, E. 1994. Gating of Shaker K<sup>+</sup> channels: II. The components  
1411 of gating currents and a model of channel activation. *Biophys J*, **66**(4): 1011–1021.  
1412 [https://doi.org/10.1016/S0006-3495\(94\)80882-3](https://doi.org/10.1016/S0006-3495(94)80882-3)
- 1413 Bishop, H. I., Cobb, M. M., Kirmiz, M., Parajuli, L. K., Mandikian, D., Philp, A. M., Melnik,  
1414 M., Kuja-Panula, J., Rauvala, H., Shigemoto, R., Murray, K. D., & Trimmer, J. S. 2018.  
1415 Kv2 ion channels determine the expression and localization of the associated AMIGO-1 cell  
1416 adhesion molecule in adult brain neurons. *Front Mol Neurosci*, **11**(1): 1-20.  
1417 <https://doi.org/10.3389/fnmol.2018.00001>
- 1418 Bishop, H. I., Guan, D., Bocksteins, E., Parajuli, L. K., Murray, K. D., Cobb, M. M., Misonou,  
1419 H., Zito, K., Foehring, R. C., & Trimmer, J. S. 2015. Distinct cell- and layer-specific  
1420 expression patterns and independent regulation of Kv2 channel subtypes in cortical  
1421 pyramidal neurons. *J Neurosci*, **35**(44): 14922–14942.

- 1422 <https://doi.org/10.1523/JNEUROSCI.1897-15.2015>
- 1423 Bocksteins, E. 2016. Kv5, Kv6, Kv8, and Kv9 subunits: No simple silent bystanders. *J Gen*
- 1424 *Physiol*, **147**(2): 105–125. <https://doi.org/10.1085/jgp.201511507>
- 1425 Brackenbury, W. J., & Isom, L. L. 2011. Na<sup>+</sup> channel  $\beta$  subunits: Overachievers of the ion
- 1426 channel family. *Front Pharmacol*, **2**(53): 1–11. <https://doi.org/10.3389/fphar.2011.00053>
- 1427 Broomand, A., Österberg, F., Wardi, T., & Elinder, F. 2007. Electrostatic domino effect in the
- 1428 Shaker K channel turret. *Biophys J*, **93**(7): 2307–2314.
- 1429 <https://doi.org/10.1529/biophysj.107.104349>
- 1430 Cerda, O., & Trimmer, J. S. 2011. Activity-dependent phosphorylation of neuronal Kv2.1
- 1431 potassium channels by CDK5. *J Biol Chem*, **286**(33): 28738–28748.
- 1432 <https://doi.org/10.1074/jbc.M111.251942>
- 1433 Chandler, W. K., Hodgkin, A. L., & Meves, H. 1965. The effect of changing the internal solution
- 1434 on sodium inactivation and related phenomena in giant axons. *J Physiol*, **180**(4): 821–836.
- 1435 <https://doi.org/10.1113/jphysiol.1965.sp007733>
- 1436 Chen, Y., Aulia, S., Li, L., & Tang, B. L. 2006. AMIGO and friends: An emerging family of
- 1437 brain-enriched, neuronal growth modulating, type I transmembrane proteins with leucine-
- 1438 rich repeats (LRR) and cell adhesion molecule motifs. *Brain Res Rev*, **51**(2): 265–274.
- 1439 <https://doi.org/10.1016/j.brainresrev.2005.11.005>
- 1440 Chen, Y., Hor, H. H., & Tang, B. L. 2012. AMIGO is expressed in multiple brain cell types and
- 1441 may regulate dendritic growth and neuronal survival. *J Cell Physiol*, **227**(5): 2217–2229.
- 1442 <https://doi.org/10.1002/jcp.22958>
- 1443 Chowdhury, S., & Chanda, B. 2012. Estimating the voltage-dependent free energy change of ion
- 1444 channels using the median voltage for activation. *J Gen Physiol*, **139**(1): 3–17.
- 1445 <https://doi.org/10.1085/jgp.201110722>
- 1446 Cobb, M. M., Austin, D. C., Sack, J. T., & Trimmer, J. S. 2016. Cell cycle-dependent changes in
- 1447 localization and phosphorylation of the plasma membrane Kv2.1 K<sup>+</sup> channel impact
- 1448 endoplasmic reticulum membrane contact sites in COS-1 cells. *J Biol Chem*, **291**(11): 5527.
- 1449 <https://doi.org/10.1074/jbc.A115.690198>
- 1450 Cohen, B. E., Pralle, A., Yao, X., Swaminath, G., Gandhi, C. S., Jan, Y. N., Kobilka, B. K.,
- 1451 Isacoff, E. Y., & Jan, L. Y. 2005. A fluorescent probe designed for studying protein
- 1452 conformational change. *Proc Natl Acad Sci U S A*, **102**(4), 965–970.
- 1453 <https://doi.org/10.1073/pnas.0409469102>
- 1454 Consiglio, J. F., & Korn, S. J. 2004. Influence of permeant ions on voltage sensor function in the
- 1455 Kv2.1 potassium channel. *J Gen Physiol*, **123**(4): 387–400.
- 1456 <https://doi.org/10.1085/jgp.200308976>
- 1457 Costes, S. V., Daelemans, D., Cho, E. H., Dobbin, Z., Pavlakis, G., & Lockett, S. 2004.
- 1458 Automatic and quantitative measurement of protein-protein colocalization in live cells.
- 1459 *Biophys J*, **86**(6): 3993–4003. <https://doi.org/10.1529/biophysj.103.038422>
- 1460 Das, S., Gilchrist, J., Bosmans, F., & Van Petegem, F. 2016. Binary architecture of the Nav1.2-
- 1461  $\beta$ 2 signaling complex. *Elife*, **5**(e10960): 1-21. <https://doi.org/10.7554/eLife.10960>
- 1462 David, J.-P., Stas, J. I., Schmitt, N., & Bocksteins, E. 2015. Auxiliary KCNE subunits modulate
- 1463 both homotetrameric Kv2.1 and heterotetrameric Kv2.1/Kv6.4 channels. *Sci Rep*, **5**(1):
- 1464 12813. <https://doi.org/10.1038/srep12813>
- 1465 Delgado-Ramírez, M., De Jesús-Pérez, J. J., Aréchiga-Figueroa, I. A., Arreola, J., Adney, S. K.,
- 1466 Villalba-Galea, C. A., Logothetis, D. E., & Rodríguez-Menchaca, A. A. 2018. Regulation of
- 1467 Kv2.1 channel inactivation by phosphatidylinositol 4,5-bisphosphate. *Sci Rep*, **8**(1): 1769.

- 1468 <https://doi.org/10.1038/s41598-018-20280-w>
- 1469 Du, J., Haak, L. L., Phillips-Tansey, E., Russell, J. T., & McBain, C. J. 2000. Frequency-  
1470 dependent regulation of rat hippocampal somato-dendritic excitability by the K<sup>+</sup> channel  
1471 subunit Kv2.1. *J Physiol*, **522 Pt 1**(1): 19–31. [https://doi.org/10.1111/j.1469-7793.2000.t01-  
1472 2-00019.xm](https://doi.org/10.1111/j.1469-7793.2000.t01-2-00019.xm)
- 1473 Dudem, S., Large, R. J., Kulkarni, S., McClafferty, H., Tikhonova, I. G., Sergeant, G. P.,  
1474 Thornbury, K. D., Shipston, M. J., Perrino, B. A., & Hollywood, M. A. 2020. LINGO1 is a  
1475 regulatory subunit of large conductance, Ca<sup>2+</sup>-activated potassium channels. *Proc Natl Acad  
1476 Sci U S A*, **117**(4): 2194–2200. <https://doi.org/10.1073/pnas.1916715117>
- 1477 Dunn, K. W., Kamocka, M. M., & McDonald, J. H. 2011. A practical guide to evaluating  
1478 colocalization in biological microscopy. *Am J Physiol Cell Physiol*, **300**(4): C723-742.  
1479 <https://doi.org/10.1152/ajpcell.00462.2010>
- 1480 Eaholtz, G., Scheuer, T., & Catterall, W. A. 1994. Restoration of inactivation and block of open  
1481 sodium channels by an inactivation gate peptide. *Neuron*, **12**(5): 1041–1048.  
1482 [https://doi.org/10.1016/0896-6273\(94\)90312-3](https://doi.org/10.1016/0896-6273(94)90312-3)
- 1483 Ednie, A. R., & Bennett, E. S. 2012. Modulation of voltage-gated ion channels by sialylation.  
1484 *Compr Physiol*, **2**(2): 1269–1301. <https://doi.org/doi:10.1002/cphy.c110044>
- 1485 Eichel, C. A., Ríos-Pérez, E. B., Liu, F., Jameson, M. B., Jones, D. K., Knickelbine, J. J., &  
1486 Robertson, G. A. 2019. A microtranslatome coordinately regulates sodium and potassium  
1487 currents in the human heart. *Elife*, **8**(e52654): 1-21. <https://doi.org/10.7554/eLife.52654>
- 1488 Elinder, F., & Århem, P. 2003. Metal ion effects on ion channel gating. *Quarterly Reviews of  
1489 Biophysics*, **36**(4): 373–427. <https://doi.org/10.1017/s0033583504003932>
- 1490 Ferrera, L., & Moran, O. 2006. β1-subunit modulates the Nav1.4 sodium channel by changing  
1491 the surface charge. *Exp Brain Res*, **172**(2): 139–150. [https://doi.org/10.1007/s00221-005-  
1492 0323-4](https://doi.org/10.1007/s00221-005-0323-4)
- 1493 Fletcher-Taylor, S., Thapa, P., Sepela, R. J., Kaakati, R., Yarov-Yarovoy, V., Sack, J. T., &  
1494 Cohen, B. E. 2020. Distinguishing potassium channel resting state conformations in live  
1495 cells with environment-sensitive fluorescence. *ACS Chem Neurosci*, **11**(15).  
1496 <https://doi.org/10.1021/acchemneuro.0c00276>
- 1497 Fox, P. D., Loftus, R. J., & Tamkun, M. M. 2013. Regulation of Kv2.1 K(+) conductance by cell  
1498 surface channel density. *J Neurosci*, **33**(3): 1259–1270.  
1499 <https://doi.org/10.1523/JNEUROSCI.3008-12.2013>
- 1500 Froehner, S. C., Luetje, C. W., Scotland, P. B., & Patrick, J. 1990. The postsynaptic 43K protein  
1501 clusters muscle nicotinic acetylcholine receptors in *Xenopus* oocytes. *Neuron*, **5**(4): 403–  
1502 410. [https://doi.org/10.1016/0896-6273\(90\)90079-u](https://doi.org/10.1016/0896-6273(90)90079-u)
- 1503 Gamper, N., Stockand, J. D., & Shapiro, M. S. 2005. The use of Chinese hamster ovary (CHO)  
1504 cells in the study of ion channels. *J Pharmacol Toxicol Methods*, **51**(3): 177–185.  
1505 <https://doi.org/10.1016/j.vascn.2004.08.008>
- 1506 Gilchrist, J., Das, S., Van Petegem, F., & Bosmans, F. 2013. Crystallographic insights into  
1507 sodium-channel modulation by the β4 subunit. *Proc Natl Acad Sci U S A*, **110**(51): E5016-  
1508 E5024. <https://doi.org/10.1073/pnas.1314557110>
- 1509 Gilly, W. F., & Armstrong, C. M. 1982. Slowing of sodium channel opening kinetics in squid  
1510 axon by extracellular zinc. *J Gen Physiol*, **79**(6): 935–964.  
1511 <https://doi.org/10.1085/jgp.79.6.935>
- 1512 Gonzalez-Perez, V., Johny, M. Ben, Xia, X. M., & Lingle, C. J. 2018. Regulatory γ1 subunits  
1513 defy symmetry in functional modulation of BK channels. *Proc Natl Acad Sci U S A*,

- 1514 **115**(40): 9923–9928. <https://doi.org/10.1073/pnas.1804560115>
- 1515 Gonzalez-Perez, V., Xia, X.-M., & Lingle, C. J. 2014. Functional regulation of BK potassium  
1516 channels by  $\gamma 1$  auxiliary subunits. *Proc Natl Acad Sci U S A*, **111**(13): 4868–4873.  
1517 <https://doi.org/10.1073/pnas.1322123111>
- 1518 Green, W. N., & Andersen, O. S. 1991. Surface charges and ion channel function. *Annu Rev*  
1519 *Physiol*, **53**(1): 341–359. <https://doi.org/10.1146/annurev.ph.53.030191.002013>
- 1520 Gupta, K., Zamanian, M., Bae, C., Milescu, M., Krepkiy, D., Tilley, D. C., Sack, J. T., Yarov-  
1521 Yarovoy, V., Kim, J. Il, & Swartz, K. J. 2015. Tarantula toxins use common surfaces for  
1522 interacting with Kv and ASIC ion channels. *Elife*, **4**(e06774): 1–20.  
1523 <https://doi.org/10.7554/eLife.06774>
- 1524 Hille, B. 2001. Ion Channel Excitable Membranes. In *Sunderland Massachusetts USA* (pp. 646–  
1525 659). [https://doi.org/10.1007/3-540-29623-9\\_5640](https://doi.org/10.1007/3-540-29623-9_5640)
- 1526 Hönigsperger, C., Nigro, M. J., & Storm, J. F. 2017. Physiological roles of Kv2 channels in  
1527 entorhinal cortex layer II stellate cells revealed by Guangxitoxin-1E. *J Physiol*, **595**(3):  
1528 739–757. <https://doi.org/10.1113/JP273024>
- 1529 Horrigan, F. T., & Aldrich, R. W. 2002. Coupling between voltage sensor activation,  $Ca^{2+}$   
1530 binding and channel opening in large conductance (BK) potassium channels. *J Gen Physiol*,  
1531 **120**(3): 267–305. <https://doi.org/10.1085/jgp.20028605>
- 1532 Ikematsu, N., Dallas, M. L., Ross, F. A., Lewis, R. W., Rafferty, J. N., David, J. A., Suman, R.,  
1533 Peers, C., Hardie, D. G., & Evansc, A. M. 2011. Phosphorylation of the voltage-gated  
1534 potassium channel Kv2.1 by AMP-activated protein kinase regulates membrane excitability.  
1535 *Proc Natl Acad Sci U S A*, **108**(44): 18132–18137. <https://doi.org/10.1073/pnas.1106201108>
- 1536 Islas, L. D., & Sigworth, F. J. 1999. Voltage sensitivity and gating charge in Shaker and Shab  
1537 family potassium channels. *J Gen Physiol*, **114**(5): 723–742.  
1538 <https://doi.org/10.1085/jgp.114.5.723>
- 1539 Isom, L., De Jongh, K., Patton, D., Reber, B., Offord, J., Charbonneau, H., Walsh, K., Goldin,  
1540 A., & Catterall, W. 1992. Primary structure and functional expression of the beta 1 subunit  
1541 of the rat brain sodium channel. *Science*, **256**(5058): 839–842.  
1542 <https://doi.org/10.1126/science.1375395>
- 1543 Isom, L. L., & Catterall, W. A. 1996.  $Na^+$  channel subunits and Ig domains. *Nature*, **383**(6598):  
1544 307–308. <https://doi.org/10.1038/383307b0>
- 1545 Isom, L. L., Ragsdale, D. S., De Jongh, K. S., Westenbroek, R. E., Reber, B. F. X., Scheuer, T.,  
1546 & Catterall, W. A. 1995. Structure and function of the  $\beta 2$  subunit of brain sodium channels,  
1547 a transmembrane glycoprotein with a CAM motif. *Cell*, **83**(3): 433–442.  
1548 [https://doi.org/10.1016/0092-8674\(95\)90121-3](https://doi.org/10.1016/0092-8674(95)90121-3)
- 1549 Jain, L., Chen, X.-J. J., Ramosevac, S., Brown, L. A., & Eaton, D. C. 2001. Expression of highly  
1550 selective sodium channels in alveolar type II cells is determined by culture conditions. *Am J*  
1551 *Physiol Lung Cell Mol Physiol*, **280**(4): 646–658.  
1552 <https://doi.org/10.1152/ajplung.2001.280.4.1646>
- 1553 Jara-Oseguera, A., Ishida, I. G., Rangel-Yescas, G. E., Espinosa-Jalapa, N., Pérez-Guzmán, J. A.,  
1554 Elías-Viñas, D., Le Lagadec, R., Rosenbaum, T., & Islas, L. D. 2011. Uncoupling charge  
1555 movement from channel opening in voltage-gated potassium channels by ruthenium  
1556 complexes. *J Biol Chem*, **286**(18): 16414–16425. <https://doi.org/10.1074/jbc.M110.198010>
- 1557 Jensen, C. S., Watanabe, S., Stas, J. I., Klaphaak, J., Yamane, A., Schmitt, N., Olesen, S.-P.,  
1558 Trimmer, J. S., Rasmussen, H. B., & Misonou, H. 2017. Trafficking of Kv2.1 channels to  
1559 the axon initial segment by a novel nonconventional secretory pathway. *J Neurosci*, **37**(48):

- 1560 11523–11536. <https://doi.org/10.1523/JNEUROSCI.3510-16.2017>
- 1561 Johnson, B., Leek, A. N., Solé, L., Maverick, E. E., Levine, T. P., & Tamkun, M. M. 2018. Kv2  
1562 potassium channels form endoplasmic reticulum/plasma membrane junctions via interaction  
1563 with VAPA and VAPB. *Proc Natl Acad Sci U S A*, **115**(31): E7331 LP-E7340.  
1564 <https://doi.org/10.1073/pnas.1805757115>
- 1565 Johnson, D., Montpetit, M. L., Stocker, P. J., & Bennett, E. S. 2004. The sialic acid component  
1566 of the  $\beta$ 1 subunit modulates voltage-gated sodium channel function. *J Biol Chem*, **279**(43):  
1567 44303–44310. <https://doi.org/10.1074/jbc.M408900200>
- 1568 Kajander, T., Kuja-Panula, J., Rauvala, H., & Goldman, A. 2011. Crystal structure and role of  
1569 glycans and dimerization in folding of neuronal leucine-rich repeat protein AMIGO-1. *J*  
1570 *Membr Biol*, **413**(5): 1001–1015. <https://doi.org/10.1016/j.jmb.2011.09.032>
- 1571 Kang, S. K., Vanoye, C. G., Misra, S. N., Echevarria, D. M., Calhoun, J. D., O'Connor, J. B.,  
1572 Fabre, K. L., McKnight, D., Demmer, L., Goldenberg, P., Grote, L. E., Thiffault, I.,  
1573 Saunders, C., Strauss, K. A., Torkamani, A., van der Smagt, J., van Gassen, K., Carson, R.  
1574 P., Diaz, J., ... Kearney, J. A. 2019. Spectrum of K(v) 2.1 dysfunction in KCNB1-  
1575 associated neurodevelopmental disorders. *Ann Neurol*, **86**(6): 899–912.  
1576 <https://doi.org/10.1002/ana.25607>
- 1577 Kazarinova-Noyes, K., Malhotra, J. D., McEwen, D. P., Mattei, L. N., Berglund, E. O., Ranscht,  
1578 B., Levinson, S. R., Schachner, M., Shrager, P., Isom, L. L., & Xiao, Z. C. 2001. Contactin  
1579 associates with Na<sup>+</sup> channels and increases their functional expression. *J Neurosci*, **21**(19):  
1580 7517–7525. <https://doi.org/10.1523/jneurosci.21-19-07517.2001>
- 1581 Kihira, Y., Hermansteyne, T. O., & Misonou, H. 2010. Formation of heteromeric Kv2 channels in  
1582 mammalian brain neurons. *J Biol Chem*, **285**(20): 15048–15055.  
1583 <https://doi.org/10.1074/jbc.M109.074260>
- 1584 Kimm, T., Khaliq, Z. M., & Bean, B. P. 2015. Differential regulation of action potential shape  
1585 and burst-frequency firing by BK and Kv2 channels in substantia nigra dopaminergic  
1586 neurons. *J Neurosci*, **35**(50): 16404–16417. [https://doi.org/10.1523/JNEUROSCI.5291-](https://doi.org/10.1523/JNEUROSCI.5291-14.2015)  
1587 14.2015
- 1588 Kirmiz, M., Palacio, S., Thapa, P., King, A. N., Sack, J. T., & Trimmer, J. S. 2018. Remodeling  
1589 neuronal ER–PM junctions is a conserved nonconducting function of Kv2 plasma  
1590 membrane ion channels. *Mol Biol Cell*, **29**(20): 2410–2432.  
1591 <https://doi.org/10.1091/mbc.E18-05-0337>
- 1592 Kirmiz, M., Vierra, N. C., Palacio, S., & Trimmer, J. S. 2018. Identification of VAPA and VAPB  
1593 as Kv2 channel-interacting proteins defining endoplasmic reticulum–plasma membrane  
1594 junctions in mammalian brain neurons. *J Neurosci*, **38**(35): 7562–7584.  
1595 <https://doi.org/10.1523/JNEUROSCI.0893-18.2018>
- 1596 Kuja-Panula, J., Kiiltomäki, M., Yamashiro, T., Rouhiainen, A., & Rauvala, H. 2003. AMIGO, a  
1597 transmembrane protein implicated in axon tract development, defines a novel protein family  
1598 with leucine-rich repeats. *J Cell Bio*, **160**(6): 963–973.  
1599 <https://doi.org/10.1083/jcb.200209074>
- 1600 Laedermann, C. J., Syam, N., Pertin, M., Decosterd, I., & Abriel, H. 2013.  $\beta$ 1- and  $\beta$ 3- voltage-  
1601 gated sodium channel subunits modulate cell surface expression and glycosylation of  
1602 Nav1.7 in HEK293 cells. *Front Cell Neurosci*, **7**: 137.  
1603 <https://doi.org/10.3389/fncel.2013.00137>
- 1604 Li, X.-T., Li, X.-Q., Hu, X.-M., & Qiu, X.-Y. 2015. The inhibitory effects of Ca<sup>2+</sup> channel  
1605 blocker nifedipine on rat Kv2.1 potassium channels. *PLoS One*, **10**(4): e0124602.



- 1606 <https://doi.org/10.1371/journal.pone.0124602>
- 1607 Lim, S. T., Antonucci, D. E., Scannevin, R. H., & Trimmer, J. S. 2000. A novel targeting signal  
1608 for proximal clustering of the Kv2.1 K<sup>+</sup> channel in hippocampal neurons. *Neuron*, **25**(2):  
1609 385–397. [https://doi.org/10.1016/S0896-6273\(00\)80902-2](https://doi.org/10.1016/S0896-6273(00)80902-2)
- 1610 Liu, P. W., & Bean, B. P. 2014. Kv2 channel regulation of action potential repolarization and  
1611 firing patterns in superior cervical ganglion neurons and hippocampal CA1 pyramidal  
1612 neurons. *J Neurosci*, **34**(14): 4991–5002. [https://doi.org/10.1523/JNEUROSCI.1925-](https://doi.org/10.1523/JNEUROSCI.1925-13.2014)  
1613 [13.2014](https://doi.org/10.1523/JNEUROSCI.1925-13.2014)
- 1614 Liu, R., Yang, G., Zhou, M.-H., He, Y., Mei, Y.-A., & Ding, Y. 2016. Flotillin-1 downregulates  
1615 K(+) current by directly coupling with Kv2.1 subunit. *Protein Cell*, **7**(6): 455–460.  
1616 <https://doi.org/10.1007/s13238-016-0276-3>
- 1617 Liu, X., Fu, Y., Yang, H., Mavlyutov, T., Li, J., McCurdy, C. R., Guo, L.-W., & Pattnaik, B. R.  
1618 2017. Potential independent action of sigma receptor ligands through inhibition of the  
1619 Kv2.1 channel. *Oncotarget*, **8**(35): 59345–59358. <https://doi.org/10.18632/oncotarget.19581>
- 1620 Liu, X., Constantinescu, S. N., Sun, Y., Bogan, J. S., Hirsch, D., Weinberg, R. A., & Lodish, H.  
1621 F. (2000). Generation of mammalian cells stably expressing multiple genes at  
1622 predetermined levels. *Anal Biochem*, **280**(1): 20–28. <https://doi.org/10.1006/abio.2000.4478>
- 1623 Long, S. B., Campbell, E. B., & MacKinnon, R. 2005. Voltage sensor of Kv1.2: Structural basis  
1624 of electromechanical coupling. *Science*, **309**(5736): 903–908.  
1625 <https://doi.org/10.1126/science.1116270>
- 1626 Long, S. B., Tao, X., Campbell, E. B., & MacKinnon, R. 2007. Atomic structure of a voltage-  
1627 dependent K<sup>+</sup> channel in a lipid membrane-like environment. *Nature*, **450**(7168): 376–382.  
1628 <https://doi.org/10.1038/nature06265>
- 1629 Lopatin, A. N., Makhina, E. N., & Nichols, C. G. 1994. Potassium channel block by cytoplasmic  
1630 polyamines as the mechanism of intrinsic rectification. *Nature*, **372**(6504): 366–369.  
1631 <https://doi.org/10.1038/372366a0>
- 1632 MacDonald, P. E., Salapatek, A. M. F., & Wheeler, M. B. 2003. Temperature and redox state  
1633 dependence of native Kv2.1 currents in rat pancreatic beta-cells. *J Physiol*, **546**(Pt 3): 647–  
1634 653. <https://doi.org/10.1113/jphysiol.2002.035709>
- 1635 Maffie, J. K., Dvoretzkova, E., Bougis, P. E., Martin-Eauclaire, M.-F., & Rudy, B. 2013.  
1636 Dipeptidyl-peptidase-like-proteins confer high sensitivity to the scorpion toxin AmmTX3 to  
1637 Kv4-mediated A-type K<sup>+</sup> channels. *J Physiol*, **591**(10): 2419–2427.  
1638 <https://doi.org/10.1113/jphysiol.2012.248831>
- 1639 Malin, S. A., & Nerbonne, J. M. 2002. Delayed rectifier K currents, I<sub>K</sub>, are encoded by Kv2-  
1640 subunits and regulate tonic firing in mammalian sympathetic neurons. *J Neurosci*, **22**(23):  
1641 10094–10105. <https://doi.org/10.1523/JNEUROSCI.22-23-10094.2002>
- 1642 Manders, E. M. M., Stap, J., Brakenhoff, G. J., Van Driel, R., & Aten, J. A. 1992. Dynamics of  
1643 three-dimensional replication patterns during the S-phase, analysed by double labelling of  
1644 DNA and confocal microscopy. *J Cell Sci*, **103**(3): 857–862.
- 1645 Mandikian, D., Bocksteins, E., Parajuli, L. K., Bishop, H. I., Cerda, O., Shigemoto, R., &  
1646 Trimmer, J. S. 2014. Cell type-specific spatial and functional coupling between mammalian  
1647 brain Kv2.1 K<sup>+</sup> channels and ryanodine receptors. *J Comp Neurol*, **522**(15): 3555–3574.  
1648 <https://doi.org/10.1002/cne.23641>
- 1649 Mardinly, A. R., Oldenburg, I. A., Pégard, N. C., Sridharan, S., Lyall, E. H., Chesnov, K.,  
1650 Brohawn, S. G., Waller, L., & Adesnik, H. 2018. Precise multimodal optical control of  
1651 neural ensemble activity. *Nat Neurosci*, **21**(6): 881–893. <https://doi.org/10.1038/s41593->

- 1652 018-0139-8
- 1653 Marionneau, C., Carrasquillo, Y., Norris, A. J., Townsend, R. R., Isom, L. L., Link, A. J., &  
1654 Nerbonne, J. M. 2012. The sodium channel accessory subunit Nav 1 regulates neuronal  
1655 excitability through modulation of repolarizing voltage-gated K<sup>+</sup> channels. *J Neurosci*,  
1656 **32**(17): 5716–5727. <https://doi.org/10.1523/JNEUROSCI.6450-11.2012>
- 1657 Maverick, E. E., Leek, A. N., & Tamkun, M. M. 2021. Kv2 channel/AMIGO  $\beta$ -subunit assembly  
1658 modulates both channel function and cell adhesion molecule surface trafficking. *J Cell Sci*.  
1659 <https://doi.org/10.1242/jcs.256339>
- 1660 McDonald, J. H., & Dunn, K. W. 2013. Statistical tests for measures of colocalization in  
1661 biological microscopy. *J Microsc*, **252**(3): 295–302. <https://doi.org/10.1111/jmi.12093>
- 1662 McEwen, D. P., & Isom, L. L. 2004. Heterophilic interactions of sodium channel beta1 subunits  
1663 with axonal and glial cell adhesion molecules. *J Biol Chem*, **279**(50): 52744–52752.  
1664 <https://doi.org/10.1074/jbc.M405990200>
- 1665 Meadows, L. S., & Isom, L. L. 2005. Sodium channels as macromolecular complexes:  
1666 Implications for inherited arrhythmia syndromes. *Cardiovasc Res*, **67**(3): 448–458.  
1667 <https://doi.org/10.1016/j.cardiores.2005.04.003>
- 1668 Messner, D. J., & Catterall, W. A. 1986. The sodium channel from rat brain: Role of the  $\beta$ 1 and  
1669  $\beta$ 2 subunits in saxitoxin binding. *J Biol Chem*, **261**(1): 211–215.  
1670 <http://www.ncbi.nlm.nih.gov/pubmed/2416745>
- 1671 Messner, D. J., Feller, D. J., Scheuer, T., & Catterall, W. A. 1986. Functional properties of rat  
1672 brain sodium channels lacking the beta 1 or beta 2 subunit. *J Biol Chem*, **261**(32): 14882–  
1673 14890. <http://www.ncbi.nlm.nih.gov/pubmed/2429961>
- 1674 Milescu, M., Bosmans, F., Lee, S., Alabi, A. A., Kim, J. II, & Swartz, K. J. 2009. Interactions  
1675 between lipids and voltage sensor paddles detected with tarantula toxins. *Nat Struct Mol*  
1676 *Biol*, **16**(10): 1080–1085. <https://doi.org/10.1038/nsmb.1679>
- 1677 Misonou, H., Menegola, M., Mohapatra, D. P., Guy, L. K., Park, K.-S., & Trimmer, J. S. 2006.  
1678 Bidirectional activity-dependent regulation of neuronal ion channel phosphorylation. *J*  
1679 *Neurosci*, **26**(52): 13505–13514. <https://doi.org/10.1523/JNEUROSCI.3970-06.2006>
- 1680 Misonou, H., Mohapatra, D. P., Menegola, M., & Trimmer, J. S. 2005. Calcium- and metabolic  
1681 state-dependent modulation of the voltage-dependent Kv2.1 channel regulates neuronal  
1682 excitability in response to ischemia. *J Neurosci*, **25**(48): 11184–11193.  
1683 <https://doi.org/10.1523/JNEUROSCI.3370-05.2005>
- 1684 Misonou, Hiroaki, Mohapatra, D. P., Park, E. W., Leung, V., Zhen, D., Misonou, K., Anderson,  
1685 A. E., & Trimmer, J. S. 2004. Regulation of ion channel localization and phosphorylation  
1686 by neuronal activity. *Nat Neurosci*, **7**(7): 711–718. <https://doi.org/10.1038/nn1260>
- 1687 Misonou, Hiroaki, Thompson, S. M., & Cai, X. 2008. Dynamic regulation of the Kv2.1 voltage-  
1688 gated potassium channel during brain ischemia through neuroglial interaction. *J Neurosci*,  
1689 **28**(34): 8529–8538. <https://doi.org/10.1523/JNEUROSCI.1417-08.2008>
- 1690 Mohapatra, D. P., Misonou, H., Pan, S. J., Held, J. E., Surmeier, D. J., & Trimmer, J. S. 2009.  
1691 Regulation of intrinsic excitability in hippocampal neurons by activity-dependent  
1692 modulation of the Kv2.1 potassium channel. *Channels*, **3**(1): 46–56. <https://doi.org/7655>  
1693 [pii]
- 1694 Moran, O., Nizzari, M., & Conti, F. 2000. Endogenous expression of the  $\beta$ 1A sodium channel  
1695 subunit in HEK-293 cells. *FEBS Lett*, **473**(2): 132–134. [https://doi.org/10.1016/S0014-5793\(00\)01518-0](https://doi.org/10.1016/S0014-5793(00)01518-0)
- 1697 Moran, O., Traverso, S., Elia, L., & Pusch, M. 2003. Molecular modeling of p-

- 1698 chlorophenoxyacetic acid binding to the CLC-0 channel. *Biochemistry*, **42**(18): 5176–5185.  
1699 <https://doi.org/10.1021/bi027368o>
- 1700 Morgan, K., Stevens, E. B., Shah, B., Cox, P. J., Dixon, A. K., Lee, K., Pinnock, R. D., Hughes,  
1701 J., Richardson, P. J., Mizuguchi, K., & Jackson, A. P. 2000. Beta 3: An additional auxiliary  
1702 subunit of the voltage-sensitive sodium channel that modulates channel gating with distinct  
1703 kinetics. *Proc Natl Acad Sci U S A*, **97**(5): 2308–2313.  
1704 <https://doi.org/10.1073/pnas.030362197>
- 1705 Mulholland, P. J., Carpenter-Hyland, E. P., Hearing, M. C., Becker, H. C., Woodward, J. J., &  
1706 Chandler, L. J. 2008. Glutamate transporters regulate extrasynaptic NMDA receptor  
1707 modulation of Kv2.1 potassium channels. *J Neurosci*, **28**(35): 8801–8809.  
1708 <https://doi.org/10.1523/JNEUROSCI.2405-08.2008>
- 1709 Murakoshi, H., Shi, G., Scannevin, R. H., & Trimmer, J. S. 1997. Phosphorylation of the Kv2.1  
1710 K<sup>+</sup> channel alters voltage-dependent activation. *Mol Pharmacol*, **52**(5): 821–828.  
1711 <https://doi.org/10.1124/mol.52.5.821>
- 1712 Nagaya, N., & Papazian, D. M. 1997. Potassium channel alpha and beta subunits assemble in the  
1713 endoplasmic reticulum. *J Biol Chem*, **272**(5): 3022–3027.  
1714 <https://doi.org/10.1074/jbc.272.5.3022>
- 1715 Nakajo, K., & Kubo, Y. 2015. KCNQ1 channel modulation by KCNE proteins via the voltage-  
1716 sensing domain. *J Physiol*, **593**(12): 2617–2625.  
1717 <https://doi.org/10.1113/jphysiol.2014.287672>
- 1718 Nguyen, H. M., Miyazaki, H., Hoshi, N., Smith, B. J., Nukina, N., Goldin, A. L., & Chandy, K.  
1719 G. 2012. Modulation of voltage-gated K<sup>+</sup> channels by the sodium channel 1 subunit. *Proc*  
1720 *Natl Acad Sci U S A*, **109**(45): 18577–18582. <https://doi.org/10.1073/pnas.1209142109>
- 1721 Niday, Z., & Tzingounis, A. V. 2018. Potassium channel gain of function in epilepsy: An  
1722 unresolved paradox. *Neuroscientist*, **24**(4): 368–380.  
1723 <https://doi.org/10.1177/1073858418763752>
- 1724 O’Connell, K. M. S., Loftus, R., & Tamkun, M. M. 2010. Localization-dependent activity of the  
1725 Kv2.1 delayed-rectifier K<sup>+</sup> channel. *Proc Natl Acad Sci U S A*, **107**(27): 12351–12356.  
1726 <https://doi.org/10.1073/pnas.1003028107>
- 1727 Palacio, S., Chevaleyre, V., Brann, D. H., Murray, K. D., Piskorowski, R. A., & Trimmer, J. S.  
1728 2017. Heterogeneity in Kv2 channel expression shapes action potential characteristics and  
1729 firing patterns in CA1 versus CA2 hippocampal pyramidal neurons. *ENeuro*, **4**(4): 1–12.  
1730 <https://doi.org/10.1523/ENEURO.0267-17.2017>
- 1731 Park, J. B., Kim, H. J., Ryu, P. D., & Moczydlowski, E. 2003. Effect of phosphatidylserine on  
1732 unitary conductance and Ba<sup>2+</sup> block of the BK Ca<sup>2+</sup>-activated K<sup>+</sup> channel: Re-examination  
1733 of the surface charge hypothesis. *J Gen Physiol*, **121**(5): 375–397.  
1734 <https://doi.org/10.1085/jgp.200208746>
- 1735 Park, K.-S., Mohapatra, D. P., Misonou, H., & Trimmer, J. S. 2006. Graded regulation of the  
1736 Kv2.1 potassium channel by variable phosphorylation. *Science*, **313**(5789): 976–979.  
1737 <https://doi.org/10.1126/science.1124254>
- 1738 Patino, G. A., Claes, L. R. F., Lopez-Santiago, L. F., Slat, E. A., Dondeti, R. S. R., Chen, C.,  
1739 O’Malley, H. A., Gray, C. B. B., Miyazaki, H., Nukina, N., Oyama, F., De Jonghe, P., &  
1740 Isom, L. L. 2009. A functional null mutation of SCN1B in a patient with Dravet syndrome.  
1741 *J Neurosci*, **29**(34): 10764–10778. <https://doi.org/10.1523/JNEUROSCI.2475-09.2009>
- 1742 Peltola, M. A., Kuja-Panula, J., Lauri, S. E., Taira, T., & Rauvala, H. 2011. AMIGO is an  
1743 auxiliary subunit of the Kv2.1 potassium channel. *EMBO Rep*, **12**(12): 1293–1299.

- 1744 <https://doi.org/10.1038/embor.2011.204>
- 1745 Peltola, M. A., Kuja-Panula, J., Liuhanen, J., Vöikar, V., Piepponen, P., Hiekkalinna, T., Taira,  
1746 T., Lauri, S. E., Suvisaari, J., Kuleskaya, N., Paunio, T., & Rauvala, H. 2015. AMIGO-  
1747 Kv2.1 potassium channel complex is associated with schizophrenia-related phenotypes.  
1748 *Schizophr Bull*, **42**(1): 105. <https://doi.org/10.1093/schbul/sbv105>
- 1749 Plant, L. D., Dowdell, E. J., Dementieva, I. S., Marks, J. D., & Goldstein, S. A. N. 2011. SUMO  
1750 modification of cell surface Kv2.1 potassium channels regulates the activity of rat  
1751 hippocampal neurons. *J Gen Physiol*, **137**(5): 441–454.  
1752 <https://doi.org/10.1085/jgp.201110604>
- 1753 Ponce, A., Castillo, A., Hinojosa, L., Martinez-Rendon, J., & Cerejido, M. 2018. The expression  
1754 of endogenous voltage-gated potassium channels in HEK293 cells is affected by culture  
1755 conditions. *Physiol Rep*, **6**(8): e13663. <https://doi.org/10.14814/phy2.13663>
- 1756 Ramu, Y., Xu, Y., & Lu, Z. 2006. Enzymatic activation of voltage-gated potassium channels.  
1757 *Nature*, **442**(7103): 696–699. <https://doi.org/10.1038/nature04880>
- 1758 Rockman, M. E., Vouga, A. G., & Rothberg, B. S. 2020. Molecular mechanism of BK channel  
1759 activation by the smooth muscle relaxant NS11021. *J Gen Physiol*, **152**(6).  
1760 <https://doi.org/10.1085/jgp.201912506>
- 1761 Romer, S. H., Dewardoff, A. S., & Fyffe, R. E. W. 2019. A molecular rheostat: Kv2.1 currents  
1762 maintain or suppress repetitive firing in motoneurons. *J Physiol*, **597**(14): 3769–3786.  
1763 <https://doi.org/10.1113/JP277833>
- 1764 Sack, J. T., & Aldrich, R. W. 2006. Binding of a gating modifier toxin induces intersubunit  
1765 cooperativity early in the Shaker K channel's activation pathway. *J Gen Physiol*, **128**(1):  
1766 119–132. <https://doi.org/10.1085/jgp.200609492>
- 1767 Schindelin, J., Arganda-Carreras, I., Frise, E., Kaynig, V., Longair, M., Pietzsch, T., Preibisch,  
1768 S., Rueden, C., Saalfeld, S., Schmid, B., Tinevez, J.-Y., White, D. J., Hartenstein, V.,  
1769 Eliceiri, K., Tomancak, P., & Cardona, A. 2012. Fiji: An open-source platform for  
1770 biological-image analysis. *Nat Methods*, **9**(7): 676–682. <https://doi.org/10.1038/nmeth.2019>
- 1771 Schmidt, J. W., & Catterall, W. A. 1986. Biosynthesis and processing of the alpha subunit of the  
1772 voltage-sensitive sodium channel in rat brain neurons. *Cell*, **46**(3): 437–444.  
1773 [https://doi.org/10.1016/0092-8674\(86\)90664-1](https://doi.org/10.1016/0092-8674(86)90664-1)
- 1774 Scholle, A., Dugarmaa, S., Zimmer, T., Leonhardt, M., Koopmann, R., Engeland, B., Pongs, O.,  
1775 & Benndorf, K. 2004. Rate-limiting reactions determining different activation kinetics of  
1776 Kv1.2 and Kv2.1 channels. *J Membr Biol*, **198**(2): 103–112. <https://doi.org/10.1007/s00232-004-0664-0>
- 1777
- 1778 Schoppa, N. E., & Sigworth, F. J. 1998. Activation of Shaker potassium channels. I.  
1779 Characterization of voltage-dependent transitions. *J Gen Physiol*, **111**(2): 271–294.  
1780 <https://doi.org/10.1085/jgp.111.2.271>
- 1781 Shen, H., Liu, D., Wu, K., Lei, J., & Yan, N. 2019. Structures of human Nav1.7 channel in  
1782 complex with auxiliary subunits and animal toxins. *Science*, **1308**(March): 1303–1308.  
1783 <https://doi.org/10.1126/science.aaw2493>
- 1784 Sigworth, F. J., & Sine, S. M. 1987. Data transformations for improved display and fitting of  
1785 single-channel dwell time histograms. *Biophys J*, **52**(6): 1047–1054.  
1786 [https://doi.org/10.1016/S0006-3495\(87\)83298-8](https://doi.org/10.1016/S0006-3495(87)83298-8)
- 1787 Speca, D. J., Ogata, G., Mandikyan, D., Bishop, H. I., Wiler, S. W., Eum, K., Wenzel, H. J.,  
1788 Doisy, E. T., Matt, L., Campi, K. L., Golub, M. S., Nerbonne, J. M., Hell, J. W., Trainor, B.  
1789 C., Sack, J. T., Schwartzkroin, P. A., & Trimmer, J. S. 2014. Deletion of the Kv2.1 delayed

- 1790 rectifier potassium channel leads to neuronal and behavioral hyperexcitability. *Genes Brain*  
1791 *Behav*, **13**(4): 394–408. <https://doi.org/10.1111/gbb.12120>
- 1792 Stewart, R., Cohen, B. E., & Sack, J. T. 2021. Fluorescent toxins as ion channel activity sensors.  
1793 *Methods Enzymol*, **653**: 295–318. <https://doi.org/10.1016/bs.mie.2021.02.014>
- 1794 Sun, J., & MacKinnon, R. 2020. Structural Basis of Human KCNQ1 Modulation and Gating.  
1795 *Cell*, **180**(2): 340–347.e9. <https://doi.org/10.1016/j.cell.2019.12.003>
- 1796 Tao, X., Lee, A., Limapichat, W., Dougherty, D. A., & MacKinnon, R. (2010). A gating charge  
1797 transfer center in voltage sensors. *Science*, **328**(5974): 67–73.  
1798 <https://doi.org/10.1126/science.1185954>
- 1799 Thapa, P., Stewart, R., Sepela, R. J., Vivas, O., Parajuli, L. K., Lillya, M., Fletcher-Taylor, S.,  
1800 Cohen, B. E., Zito, K., & Sack, J. T. 2021. Optical measurement of voltage sensing by  
1801 endogenous ion channels. *bioRxiv*, 541805. <https://doi.org/10.1101/541805>
- 1802 Thiffault, I., Specca, D. J., Austin, D. C., Cobb, M. M., Eum, K. S., Safina, N. P., Grote, L.,  
1803 Farrow, E. G., Miller, N., Soden, S., Kingsmore, S. F., Trimmer, J. S., Saunders, C. J., &  
1804 Sack, J. T. 2015. A novel epileptic encephalopathy mutation in KCNB1 disrupts Kv2.1 ion  
1805 selectivity, expression, and localization. *J Gen Physiol*, **146**(5): 399–410.  
1806 <https://doi.org/10.1085/jgp.201511444>
- 1807 Tilley, D. C., Angueyra, J. M., Eum, K. S., Kim, H., Chao, L. H., Peng, A. W., & Sack, J. T.  
1808 2019. The tarantula toxin GxTx detains K<sup>+</sup> channel gating charges in their resting  
1809 conformation. *J Gen Physiol*, **151**(3): 292–315. <https://doi.org/10.1085/jgp.201812213>
- 1810 Tilley, D. C., Eum, K. S., Fletcher-Taylor, S., Austin, D. C., Dupre, C., Patron, L. A., Garcia, R.  
1811 L., Lam, K., Yarov-Yarovoy, V., Cohen, B. E., & Sack, J. T. (2014). Chemoselective  
1812 tarantula toxins report voltage activation of wild-type ion channels in live cells. *Proc Natl*  
1813 *Acad Sci U S A*, **111**(44): E4789–E4796. <https://doi.org/10.1073/pnas.1406876111>
- 1814 Torkamani, A., Bersell, K., Jorge, B. S., Bjork, R. L., Friedman, J. R., Bloss, C. S., Cohen, J.,  
1815 Gupta, S., Naidu, S., Vanoye, C. G., George, A. L., & Kearney, J. A. 2014. De novo  
1816 KCNB1 mutations in epileptic encephalopathy. *Ann Neurol*, **76**(4): 529–540.  
1817 <https://doi.org/10.1002/ana.24263>
- 1818 Trapani, J. G., Andalib, P., Consiglio, J. F., & Korn, S. J. 2006. Control of single channel  
1819 conductance in the outer vestibule of the Kv2.1 potassium channel. *J Gen Physiol*, **128**(2):  
1820 231–246. <https://doi.org/10.1085/jgp.200509465>
- 1821 Trapani, J. G., & Korn, S. J. 2003. Control of ion channel expression for patch clamp recordings  
1822 using an inducible expression system in mammalian cell lines. *BMC neurosci*, **4**(15).  
1823 <https://doi.org/10.1186/1471-2202-4-15>
- 1824 Trimmer, J. S. 1993. Expression of Kv2.1 delayed rectifier K<sup>+</sup> channel isoforms in the  
1825 developing rat brain. *FEBS Lett*, **324**(2): 205–210. [https://doi.org/10.1016/0014-](https://doi.org/10.1016/0014-5793(93)81394-F)  
1826 [5793\(93\)81394-F](https://doi.org/10.1016/0014-5793(93)81394-F)
- 1827 Vacher, H., Mohapatra, D. P., & Trimmer, J. S. 2008. Localization and targeting of voltage-  
1828 dependent ion channels in mammalian central neurons. *Physiol Rev*, **88**(4): 1407–1447.  
1829 <https://doi.org/10.1152/physrev.00002.2008>
- 1830 Vagin, O., Kraut, J. A., & Sachs, G. 2009. Role of N-glycosylation in trafficking of apical  
1831 membrane proteins in epithelia. *Am J Physiol Renal Physiol*, **296**(3): F459–69.  
1832 <https://doi.org/10.1152/ajprenal.90340.2008>
- 1833 Vierra, N. C., Kirmiz, M., van der List, D., Santana, L. F., & Trimmer, J. S. 2019. Kv2.1  
1834 mediates spatial and functional coupling of L-type calcium channels and ryanodine  
1835 receptors in mammalian neurons. *Elife*, **8**(e49953). <https://doi.org/10.7554/eLife.49953>

- 1836 Wang, Y. W., Ding, J. P., Xia, X. M., & Lingle, C. J. 2002. Consequences of the stoichiometry  
1837 of Slo1,  $\alpha$  and auxiliary  $\beta$  subunits on functional properties of large-conductance  $\text{Ca}^{2+}$ -  
1838 activated  $\text{K}^+$  channels. *J Neurosci*, **22**(5): 1550–1561. [https://doi.org/10.1523/jneurosci.22-](https://doi.org/10.1523/jneurosci.22-05-01550.2002)  
1839 [05-01550.2002](https://doi.org/10.1523/jneurosci.22-05-01550.2002)
- 1840 Wilson, M. J., Zhang, M. M., Azam, L., Olivera, B. M., Bulaj, G., & Yoshikami, D. 2011. Nav $\beta$   
1841 subunits modulate the inhibition of Nav1.8 by the analgesic gating modifier  $\mu\text{O}$ -conotoxin  
1842 MrVIB. *J Pharmacol Exp Ther*, **338**(2): 687–693. <https://doi.org/10.1124/jpet.110.178343>
- 1843 Xu, H., Li, T., Rohou, A., Arthur, C. P., Tzakoniati, F., Wong, E., Estevez, A., Kugel, C.,  
1844 Franke, Y., Chen, J., Ciferri, C., Hackos, D. H., Koth, C. M., & Payandeh, J. 2019.  
1845 Structural basis of Nav1.7 inhibition by a gating-modifier spider toxin. *Cell*, **176**(4). 702–  
1846 715. <https://doi.org/10.1016/j.cell.2018.12.018>
- 1847 Yan, J., & Aldrich, R. W. 2012. BK potassium channel modulation by leucine-rich repeat-  
1848 containing proteins. *Proc Natl Acad Sci U S A*, **109**(20): 7917–7922.  
1849 <https://doi.org/10.1073/pnas.1205435109>
- 1850 Yan, Jiusheng, & Aldrich, R. W. 2010. LRRC26 auxiliary protein allows BK channel activation  
1851 at resting voltage without calcium. *Nature*, **466**(7305): 513–516.  
1852 <https://doi.org/10.1038/nature09162>
- 1853 Yu, F. H., Westenbroek, R. E., Silos-Santiago, I., McCormick, K. A., Lawson, D., Ge, P.,  
1854 Ferreira, H., Lilly, J., DiStefano, P. S., Catterall, W. A., Scheuer, T., & Curtis, R. 2003.  
1855 Sodium channel beta4, a new disulfide-linked auxiliary subunit with similarity to beta2. *J*  
1856 *Neurosci*, **23**(20): 7577–7585. <https://doi.org/10.1523/JNEUROSCI.23-20-07577.2003>
- 1857 Yu, S. P., & Kerchner, G. A. 1998. Endogenous voltage-gated potassium channels in human  
1858 embryonic kidney (HEK293) cells. *J Neurosci Res*, **52**(5): 612–617.  
1859 [https://doi.org/10.1002/\(SICI\)1097-4547\(19980601\)52:5<612::AID-JNR13>3.0.CO;2-3](https://doi.org/10.1002/(SICI)1097-4547(19980601)52:5<612::AID-JNR13>3.0.CO;2-3)
- 1860 Zagotta, W. N., Hoshi, T., Dittman, J., & Aldrich, R. W. 1994. Shaker potassium channel gating.  
1861 II: Transitions in the activation pathway. *J Gen Physiol*, **103**(2): 279–319.  
1862 <https://doi.org/10.1085/jgp.103.2.279>
- 1863 Zhang, J., & Yan, J. 2014. Regulation of BK channels by auxiliary  $\gamma$  subunits. *Front Physiol*, **5**:  
1864 401. <https://doi.org/10.3389/fphys.2014.00401>
- 1865 Zhao, X., Kuja-Panula, J., Sundvik, M., Chen, Y.-C., Aho, V., Peltola, M. A., Porkka-Heiskanen,  
1866 T., Panula, P., & Rauvala, H. 2014. Amigo adhesion protein regulates development of  
1867 neural circuits in zebrafish brain. *J Biol Chem*, **289**(29): 19958–19975.  
1868 <https://doi.org/10.1074/jbc.M113.545582>
- 1869

1870 Supplemental Material

1871 Supplemental Figure 1. SCN1 $\beta$  did not detectably modulate Kv2.1 conductance in HEK293 cells.

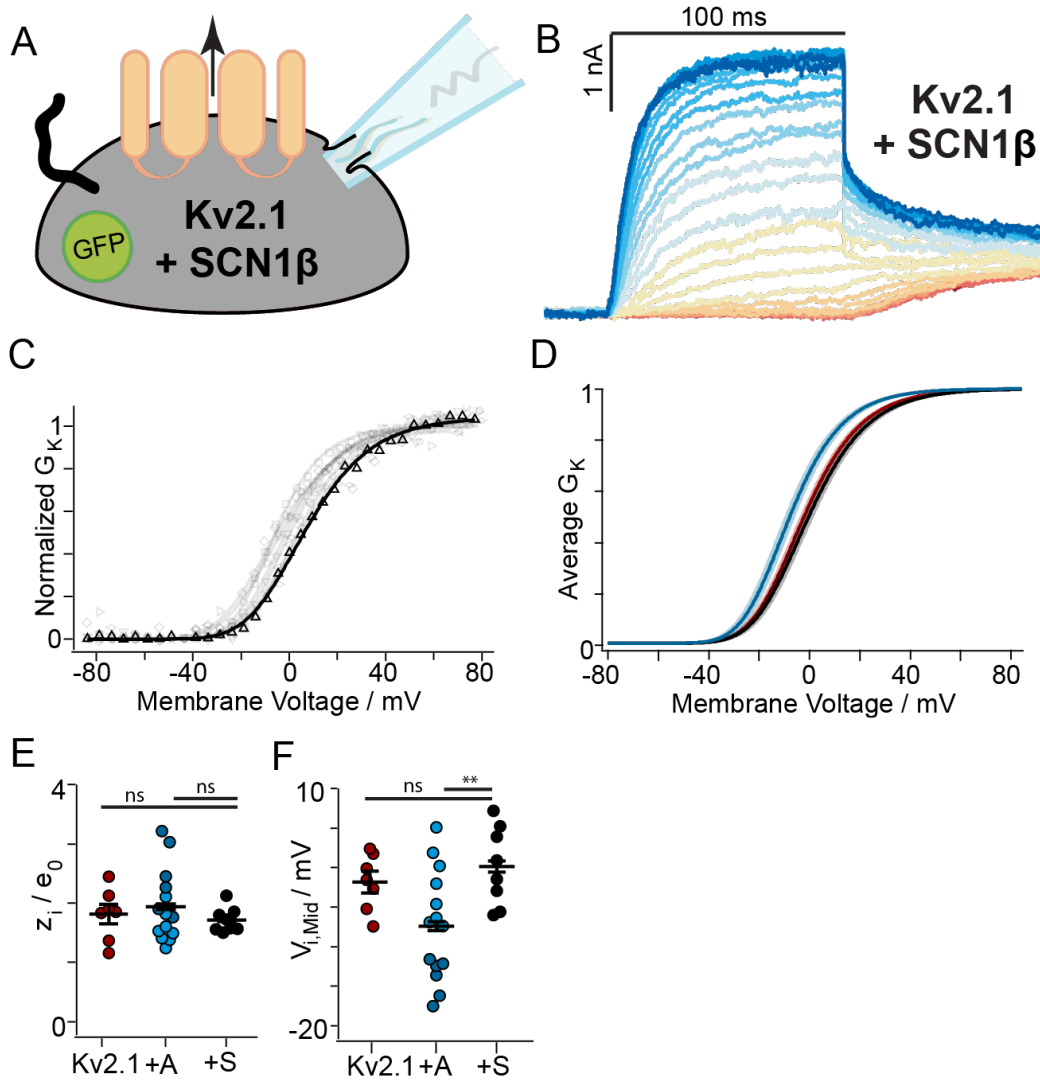

1872  
 1873 *Supplemental Figure 1. SCN1 $\beta$  did not detectably modulate Kv2.1 conductance in HEK293 cells.*  
 1874 (A) Experimental set up: HEK293 cells were co-transfected 48 hours prior to whole-cell recording with mKv2.1 and  
 1875 SCN1 $\beta$ -pIRES2-GFP (black). Macroscopic K<sup>+</sup> ionic current was recorded (black arrow). Recording solutions are  
 1876 depicted in Fig. 1A. The human voltage-gated sodium channel auxiliary subunit, subtype 1 (SCN1 $\beta$ ) was used as a  
 1877 control to assess the effects of overexpressing mKv2.1 with an unrelated single-pass transmembrane protein that  
 1878 contains an extracellular immunoglobulin domain (Isom et al., 1992; Isom & Catterall, 1996; Morgan et al., 2000;  
 1879 Yu et al., 2003). (B) Representative Kv2.1 current response elicited from a mKv2.1 + SCN1 $\beta$  (10.0 pF) HEK293  
 1880 cell. Cells were given 100 ms voltage steps ranging from -80 mV (red) to +85 mV (dark blue) and then stepped to 0  
 1881 mV to record tail currents. The holding potential was -80 mV. 8 of 27 mKv2.1 + SCN1 $\beta$  cells satisfied our outward  
 1882  $I_K$  density inclusion threshold for analysis (C) Normalized  $G$ -V relationships for mKv2.1 + SCN1 $\beta$  HEK293 cells.  
 1883 Different symbols correspond to individual cells and the bolded trace corresponds to the representative current  
 1884 response shown in panel B. Solid lines represent 4<sup>th</sup> order Boltzmann relationships (Eqn. C). (D) Reconstructed 4<sup>th</sup>  
 1885 order Boltzmann fits using the average  $V_{i,Mid}$  and the average  $z_i$  (Table 1). Shaded areas represent  $V_{i,Mid} \pm SEM$ . (E)  
 1886 Steepness and (F) midpoint of 4<sup>th</sup> order Boltzmann fits. Bars are mean  $\pm SEM$ . SCN1 $\beta$  co-transfection modulates the

1887 function of Nav, K<sub>v</sub>1.1, K<sub>v</sub>1.2, K<sub>v</sub>1.3, K<sub>v</sub>1.6, K<sub>v</sub>4.2 and K<sub>v</sub>7.2 channels (Marionneau et al., 2012; Nguyen et al.,  
1888 2012), yet, in our study, SCNβ1 gave no indication of mKv2.1 modulation. (**Statistics, E, F**) Unpaired, two-tailed,  
1889 T-tests p-values are in Table 1. \*\*: p = ≤0.01, ns: not significant.



1890 Supplemental Figure 2. Kv2.1 current density  $\pm$  AMIGO1 in HEK293 and Kv2.1-CHO cells.

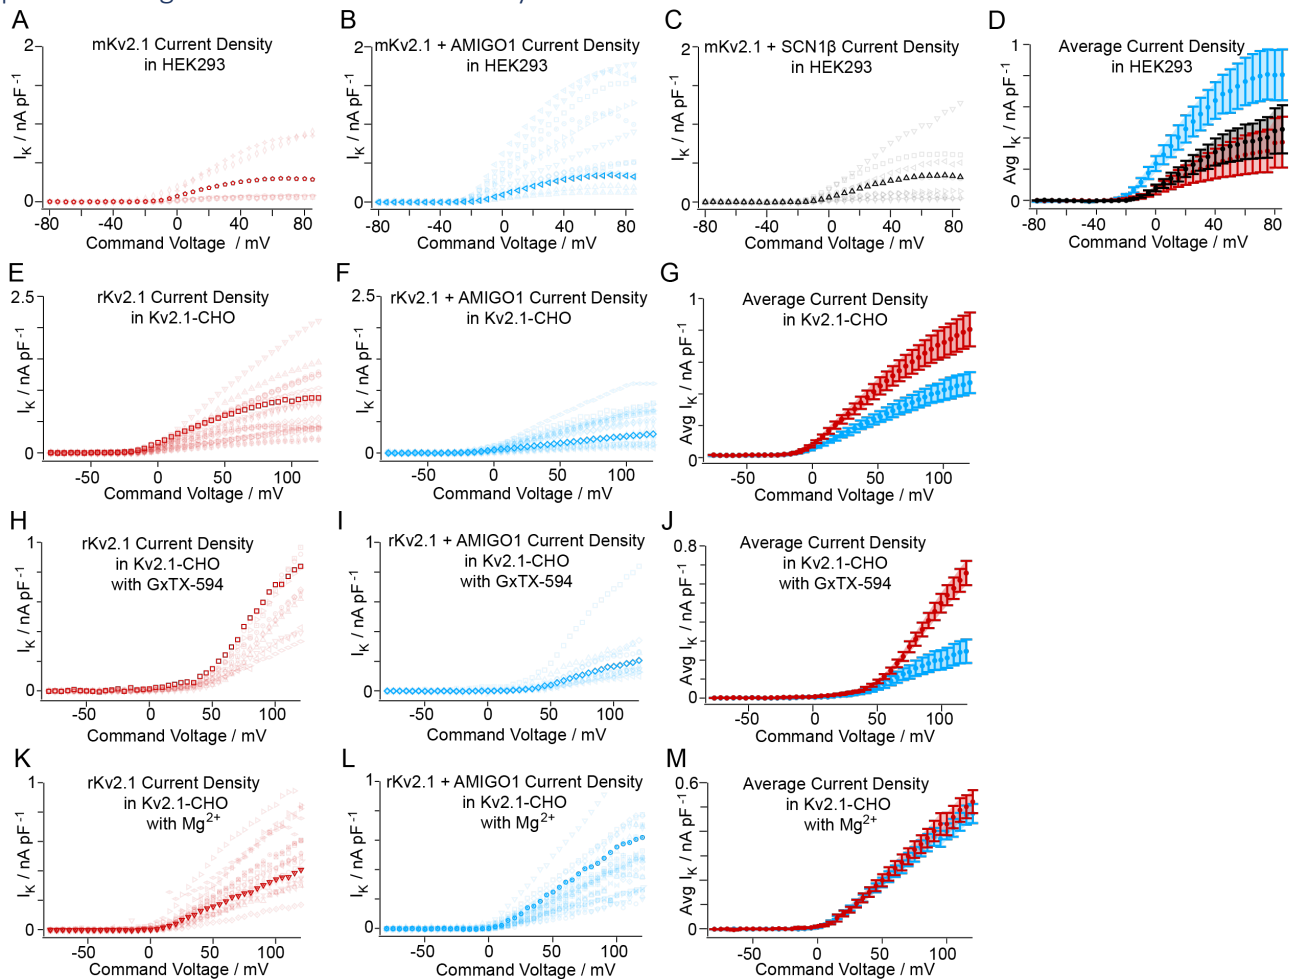

1891  
 1892 *Supplemental Figure 2. Kv2.1 current density  $\pm$  AMIGO1 in HEK293 and Kv2.1-CHO cells.*  
 1893 AMIGO1 has mixed effects on current density in HEK293 and Kv2.1-CHO cells. Outward current densities  
 1894 normalized by cell capacitance were calculated from mean of the last 10 ms of each voltage step and plotted against  
 1895 the command voltage. Symbols represent individual cells. **(A, B, C respectively)** HEK293 cells co-transfected with  
 1896 mKv2.1 + GFP, mKv2.1 + AMIGO1-pIRES2-GFP, or mKv2.1 SCN1B-pIRES2-GFP. Respectively, 11 of 17, 14  
 1897 of 28, and 19 of 28 cells that did not meet the inclusion criteria are not pictured. Thus, the full variability of current  
 1898 densities is more extreme than depicted here. Bolded star or triangle data corresponds to exemplar cell shown in Fig.  
 1899 1B, 1C, and Supplemental Fig. 1C. **(D)** Arithmetic means and standard error for aggregate data in A, B, and C. **(E, F**  
 1900 **respectively)** Kv2.1-CHO cells transfected with GFP or AMIGO1-YFP and induced for Kv2.1 expression for 1-2  
 1901 h. Bolded square or diamond data corresponds to exemplar cell shown in Fig. 4B or 4C. **(G)** Arithmetic means and  
 1902 standard error for aggregate data in E and F. **(H, I respectively)** Kv2.1-CHO cells transfected with GFP or with  
 1903 AMIGO1-YFP and induced for Kv2.1 expression for 1-2 h. Recordings were made in 100 nM GxTX-594. Bolded  
 1904 square or diamond corresponds to exemplar cell shown in Fig. 6B or 6C. Unique cells are symbol matched between  
 1905 E/H and F/I to represent the same cell both before and after GxTX-594 addition. **(J)** Arithmetic means and standard  
 1906 error for aggregate data in H and I. **(K, L respectively)** Kv2.1-CHO transfected cells with GFP or AMIGO1-YFP  
 1907 and induced for Kv2.1 expression for 1-2 h. Recordings were made in 3.5 mM K<sup>+</sup>/100 mM Mg<sup>2+</sup> external recording  
 1908 solution. Bolded triangle or circle data corresponds to exemplar cell shown in Fig. 10B or 10C. **(M)** Arithmetic  
 1909 means and standard error for aggregate data in H and I.  
 1910

1911 Supplemental Figure 3. AMIGO1 does not impede GxTX-594 binding to Kv2.1.

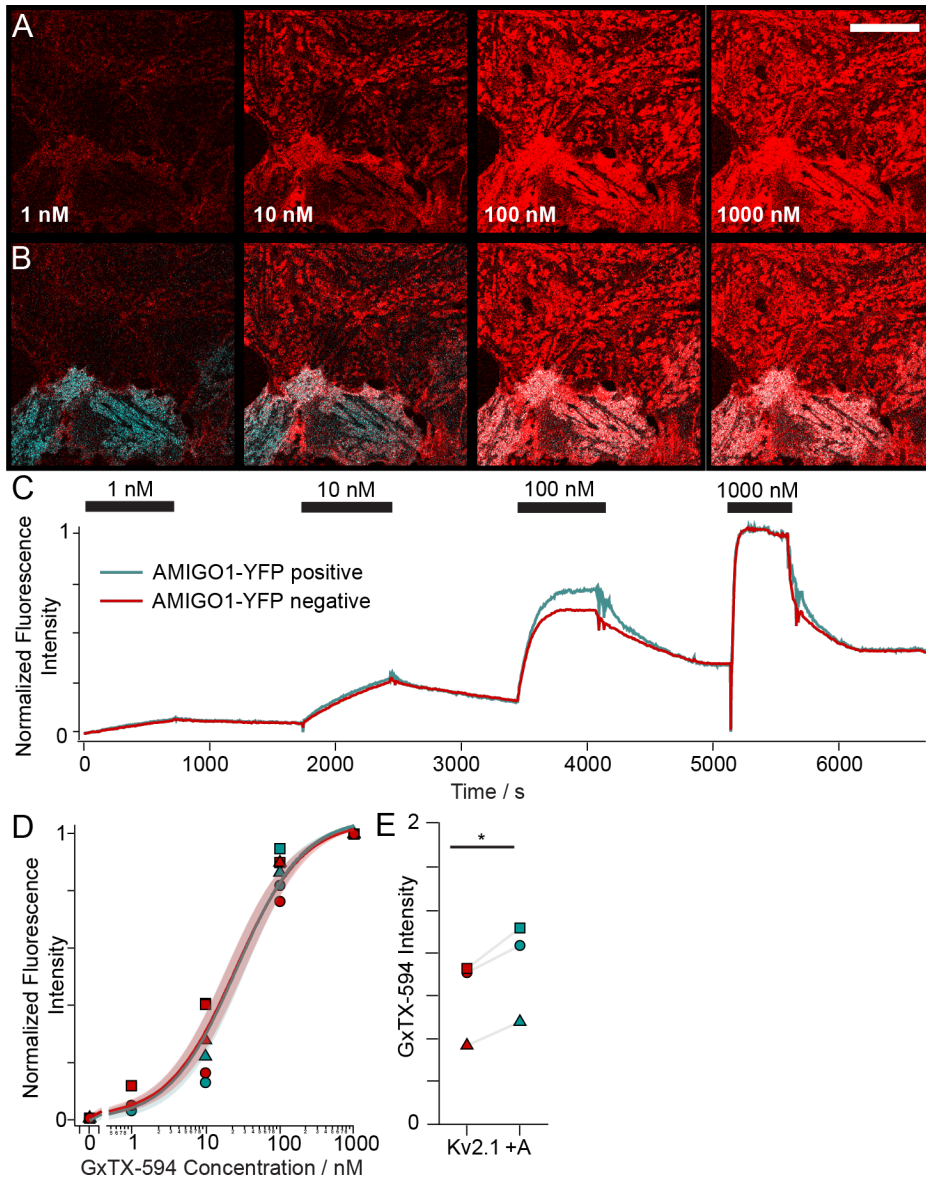

1912

1913 *Supplemental Figure 3. AMIGO1 does not impede GxTX-594 binding to Kv2.1.*

1914 (A) Confocal image of the fluorescence from Kv2.1-CHO cells transfected with AMIGO1-YFP, induced for Kv2.1  
1915 expression for 48 hours and labeled with indicated concentrations of the Alexa594 conjugate of GxTX, GxTX-594,  
1916 (Thapa et al., 2021) (red). In this cell preparation AMIGO1 impacts Kv2.1 voltage sensor movement, consistent with  
1917 most, if not all Kv2.1 proteins assembling with AMIGO1 (Fig. 7 and Fig. 8). The imaging plane was near the glass-  
1918 adhered cell membrane surface. Scale bar is 20  $\mu\text{m}$ . (B) Overlap (white) between AMIGO1-YFP (cyan) and GxTX-  
1919 594 fluorescence signals (C) Mean fluorescence intensities from ROIs encompassing either all of the AMIGO1-  
1920 YFP positive or AMIGO1-YFP negative cells from the dose-response experiment shown in A. (D) Background-  
1921 subtracted fluorescence intensity after 500 s at each concentration as in panel C. Symbol shapes represent data from  
1922 each of 3 experiments. Curves and shaded regions represent the mean  $\pm$  SEM of a Langmuir binding isotherm (Eqn.  
1923 K) fit to individual experiments, respectively.  $K_d = 27.5 \pm 8.3$  nM without AMIGO1-YFP expression and  $27.9 \pm 7.2$   
1924 nM with AMIGO1-YFP.  $K_d$  from fits are likely an overestimate due to incomplete equilibration at 1 and 10 nM. (E)  
1925 Cells expressing AMIGO1-YFP had brighter GxTX-594 fluorescence. Symbols are mean GxTX-594 fluorescence  
1926 intensity values acquired from 1000 nM GxTX-594 labeling. Symbols correspond with D.

1927 Supplemental Table 1. Split Pseudo–Voigt fitting parameters.

| GxTX(JP) conjugate | AMIGO1–YFP Expression | fitting component | a0    | a1    | a2     | a3     | a4     | a5     | R <sup>2</sup> |
|--------------------|-----------------------|-------------------|-------|-------|--------|--------|--------|--------|----------------|
| GxTX Ser13Pra(JP)  | - AMIGO               | 1                 | 0.229 | 670.4 | 47.88  | 11.41  | 1.075  | 2.323  | 0.999          |
|                    |                       | 2                 | 0.813 | 647.0 | 25.73  | 21.77  | 0.631  | 1.685  |                |
|                    | + AMIGO               | 1                 | 0.893 | 646.7 | 23.30  | 25.63  | 1.822  | 0.721  | 0.997          |
|                    |                       | 2                 | 0.006 | -1610 | -15206 | -1877  | 4967   | 461.2  |                |
| GxTX Lys27Pra(JP)  | - AMIGO               | 1                 | 0.352 | 594.3 | 12.11  | -11.53 | 0.568  | 5.364  | 0.998          |
|                    |                       | 2                 | 0.719 | 608.2 | 9.71   | 59.05  | 0.359  | -0.264 |                |
|                    | + AMIGO               | 1                 | 0.715 | 597.8 | 16.07  | 18.08  | 1.578  | 2.912  | 0.997          |
|                    |                       | 2                 | 0.632 | 616.3 | 9.05   | 26.28  | -1.657 | 1.488  |                |

1928 Supplemental Table 1. Split Pseudo–Voigt fitting parameters.

1929 Fluorescence emission spectra split pseudo–Voigt fitting parameters and root-mean squared values.
